# Supplementary material for: Whole genome sequencing identifies multiple loci for critical illness caused by COVID-19
Source: bioRxiv or medRxiv preprint supplement (doi:10.1101/2021.09.02.21262965), 2021-09-08
Supplement: Supplementary file [file media-1.pdf]

# Supplementary material

1

2

## 3 Contents

|    |                                                                                  |           |
|----|----------------------------------------------------------------------------------|-----------|
| 4  | <b>Overview of analysis</b>                                                      | <b>3</b>  |
| 5  | <b>Cohort characteristics</b>                                                    | <b>4</b>  |
| 6  | Pre-QC breakdown . . . . .                                                       | 4         |
| 7  | SampleQC . . . . .                                                               | 5         |
| 8  | PCA and ancestry . . . . .                                                       | 7         |
| 9  | Post-QC breakdown . . . . .                                                      | 7         |
| 10 | Age and sex breakdown . . . . .                                                  | 7         |
| 11 | <b>GWAS</b>                                                                      | <b>14</b> |
| 12 | Per-population GWAS results . . . . .                                            | 14        |
| 13 | LD-based validation of lead GWAS signals . . . . .                               | 16        |
| 14 | Association signal forest plots . . . . .                                        | 17        |
| 15 | Replication forestplots . . . . .                                                | 20        |
| 16 | Genetic fine-mapping and colocalisation . . . . .                                | 23        |
| 17 | Stratified analysis . . . . .                                                    | 30        |
| 18 | <b>TWAS</b>                                                                      | <b>31</b> |
| 19 | eQTL TWAS . . . . .                                                              | 31        |
| 20 | Colocalisation sensitivity analysis . . . . .                                    | 32        |
| 21 | <b>Aggregate variant testing (AVT)</b>                                           | <b>35</b> |
| 22 | Masks and Model . . . . .                                                        | 35        |
| 23 | AVT results . . . . .                                                            | 35        |
| 24 | <b>HLA Inference and Association Tests</b>                                       | <b>36</b> |
| 25 | HLA imputation using HIBAG . . . . .                                             | 36        |
| 26 | HLA inference using HLA*LA and concordance between HIBAG and HLA*LA callsets . . | 38        |
| 27 | HLA Association Tests . . . . .                                                  | 38        |
| 28 | Conditional Analysis . . . . .                                                   | 39        |
| 29 | <b>Meta-analysis by information content (MAIC)</b>                               | <b>41</b> |
| 30 | <b>References</b>                                                                | <b>42</b> |

|    |                                           |           |
|----|-------------------------------------------|-----------|
| 31 | <b>GenOMICC Investigators</b>             | <b>42</b> |
| 32 | <b>Covid-19 Human Genetics Initiative</b> | <b>63</b> |
| 33 | <b>23andMe Investigators</b>              | <b>63</b> |

34 Overview of analysis

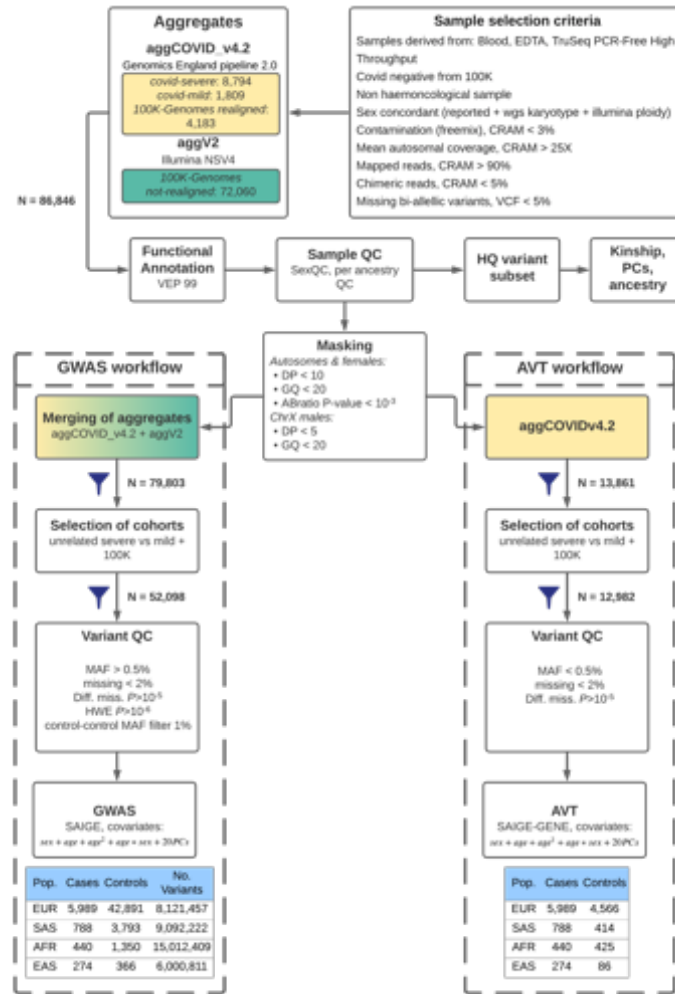

Figure 1: Diagram showing the analysis workflow for genome-wide association study (GWAS) and aggregate variant testing (AVT) analyses of this study.

35 **Cohort characteristics**

36 **Pre-QC breakdown**

| Cohort                             | Instrument | Alignment & variant calling workflow                    | N (pre-QC) | Included in aggregate |
|------------------------------------|------------|---------------------------------------------------------|------------|-----------------------|
| <i>covid - severe</i>              | NovaSeq    | Genomics England pipeline 2.0                           | 8,794      | aggCOVID_v4.2         |
| <i>covid - mild</i>                | NovaSeq    | Genomics England pipeline 2.0                           | 1,809      | aggCOVID_v4.2         |
| <i>100K-Genomes(not realigned)</i> | Hiseq X    | Illumina North Star Version 4 (NSV4, version 2.6.53.23) | 72,060     | aggV2                 |
| <i>100K-Genomes(realigned)</i>     | Hiseq X    | Genomics England pipeline 2.0                           | 4,183      | aggCOVID_v4.2         |

Table 1: Breakdown of the cohorts included in this study

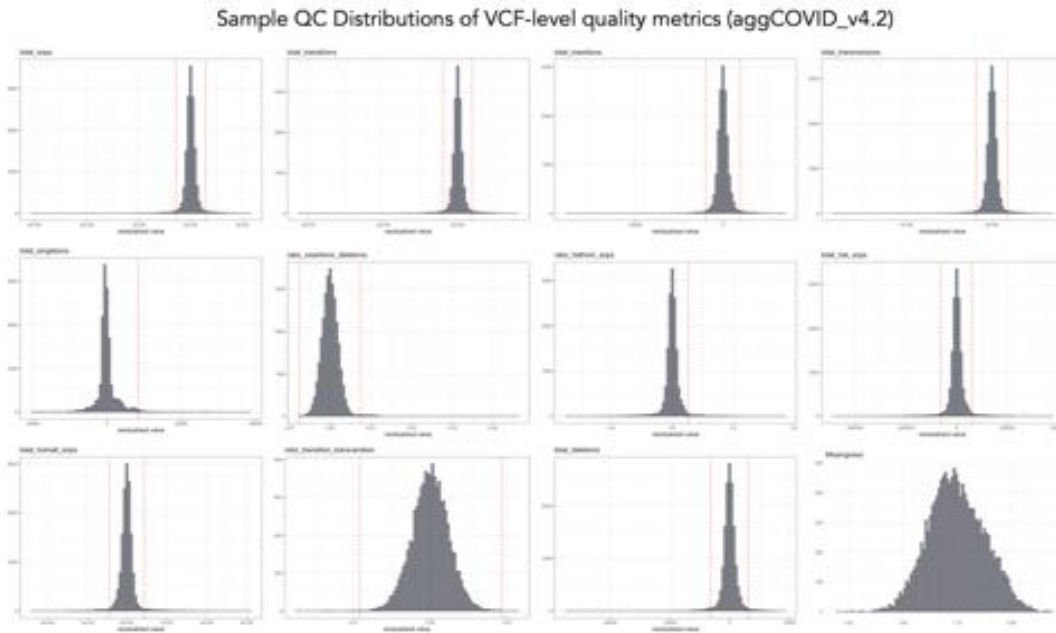

Figure 2: Each histogram shows the distribution of samples in the aggCOVID v4.2 data-set for a particular VCF-level quality metric, following adjustment for sequencing platform and the first three ancestry assignment principal components (as described in Methods). All metrics are calculated from autosomal bi-allelic SNVs. The dashed red lines indicate the threshold for sample exclusion. Samples were removed that were four median absolute deviations (MADs) above or below the median for the following metrics: ratio heterozygous-homozygous, ratio insertions-deletions, ratio transitions-transversions, total deletions, total insertions, total heterozygous snps, total homozygous snps, total transitions, total transversions. For the number of total singletons (snps), samples were removed that were more than 8 MADs above the median. For the ratio of heterozygous to homozygous alternate snps, samples were removed that were more than 4 MADs above the median. For sample-missingness (bottom-right panel), a hard cut-off of 0.05 was applied (no adjustment for sequencing platform or ancestry).

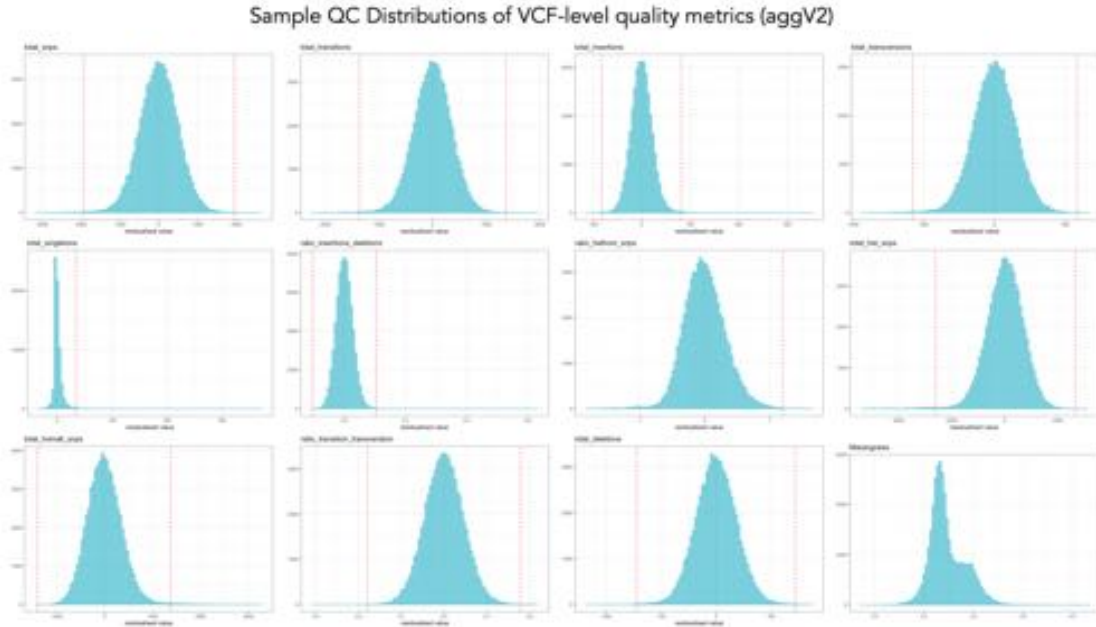

Figure 3: Each histogram shows the distribution of samples in the aggV2 data-set for a particular VCF-level quality metric, following adjustment for sequencing platform and the first three ancestry assignment principal components (as described in Methods). All metrics are calculated from autosomal bi-allelic SNVs. The dashed red lines indicate the threshold for sample exclusion. Samples were removed that were four median absolute deviations (MADs) above or below the median for the following metrics: ratio heterozygous-homozygous, ratio insertions-deletions, ratio transitions-transversions, total deletions, total insertions, total heterozygous snps, total homozygous snps, total transitions, total transversions. For the number of total singletons (snps), samples were removed that were more than 8 MADs above the median. For the ratio of heterozygous to homozygous alternate snps, samples were removed that were more than 4 MADs above the median. For sample-missingness (bottom-right panel), a hard cut-off of 0.05 was applied (no adjustment for sequencing platform or ancestry).

38 **PCA and ancestry**

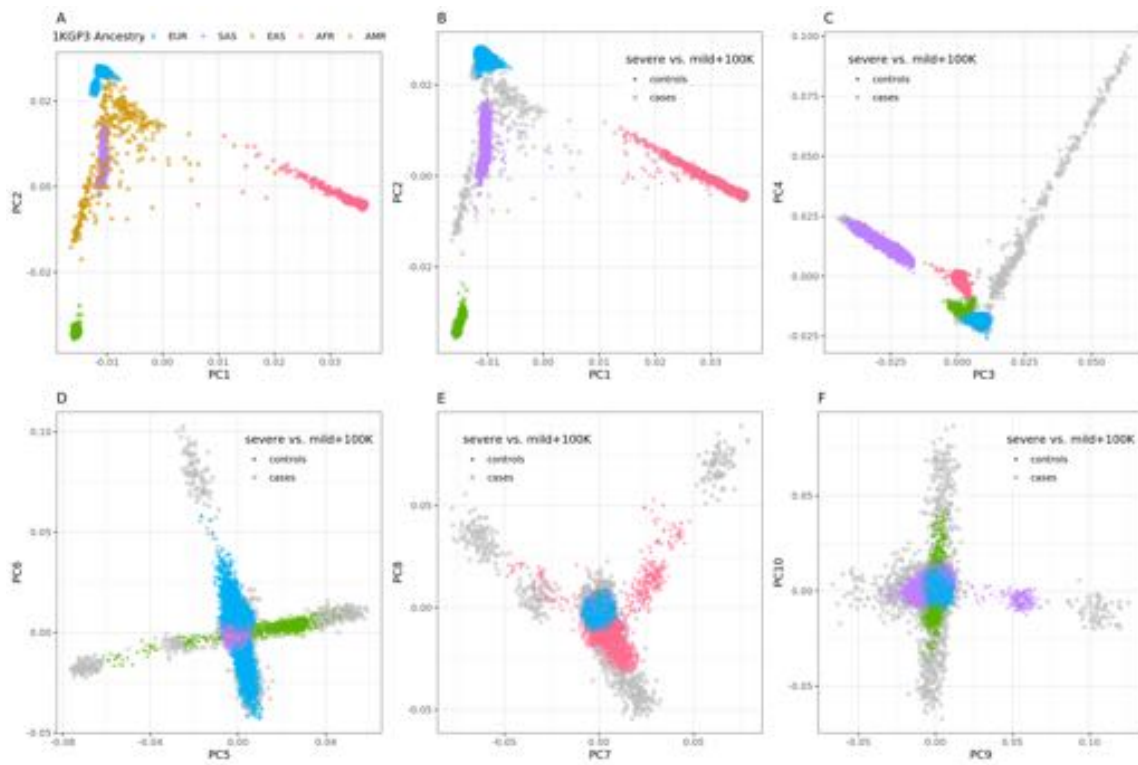

Figure 4: Projection of severe, mild and 100K individuals onto the PCs of the 1KGP3. (A) PCs 1 & 2 for 1KGP3 unrelated individuals using the high quality independent SNP set. (B-F). Projected PCs 1-10 for severe (cases) and mild + 100K individuals (controls). 1KGP3 reference individuals are shown in grey.

39 **Post-QC breakdown**

40 **Age and sex breakdown**

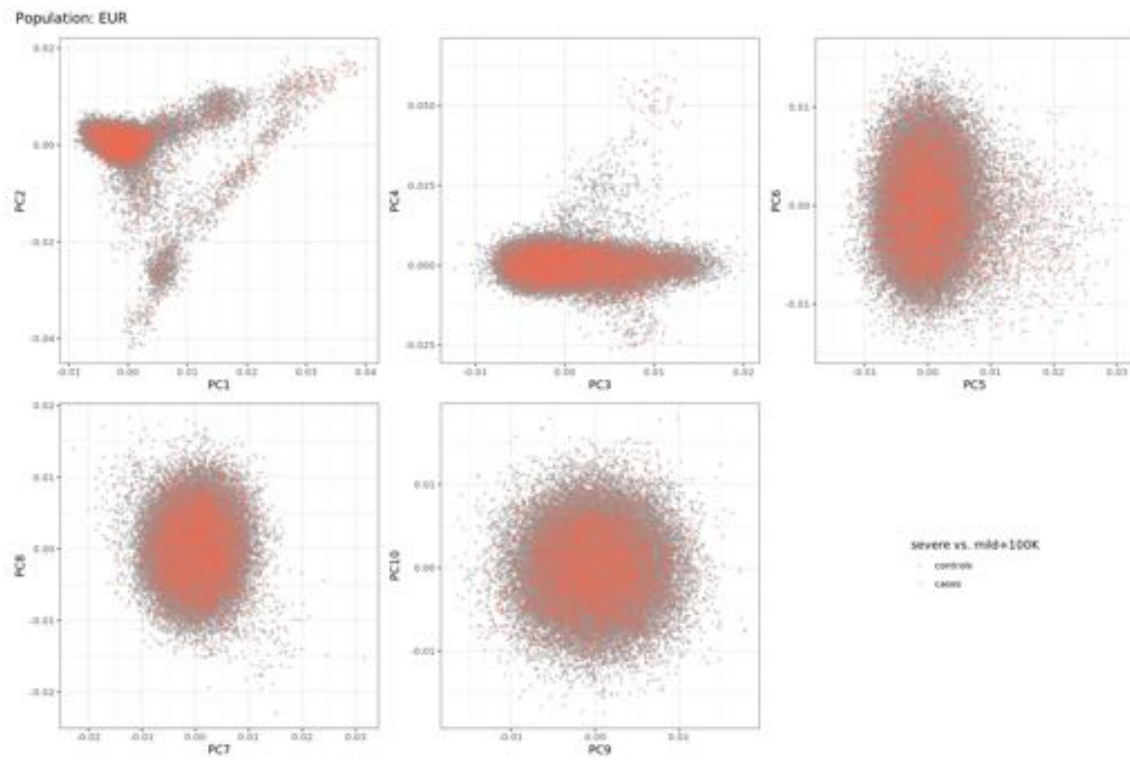

Figure 5: EUR PCs 1-10 for severe (cases) and mild + 100K individuals (controls).



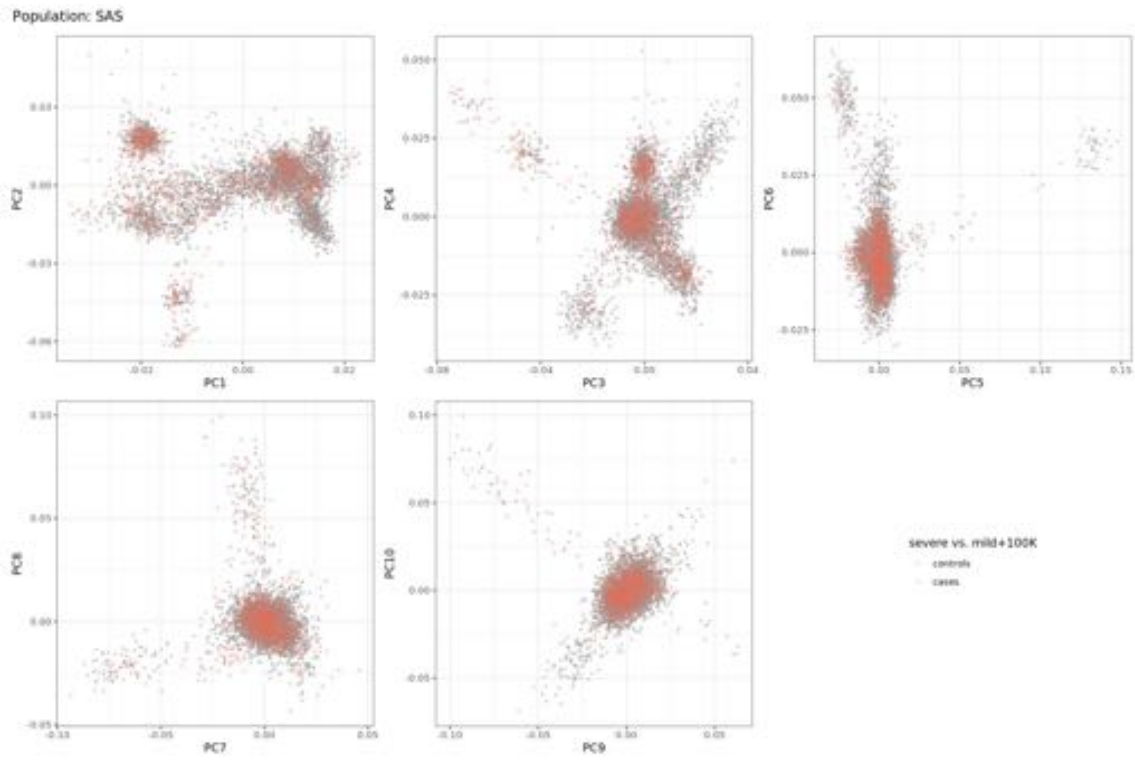

Figure 6: SAS PCs 1-10 for severe (cases) and mild + 100K individuals (controls).

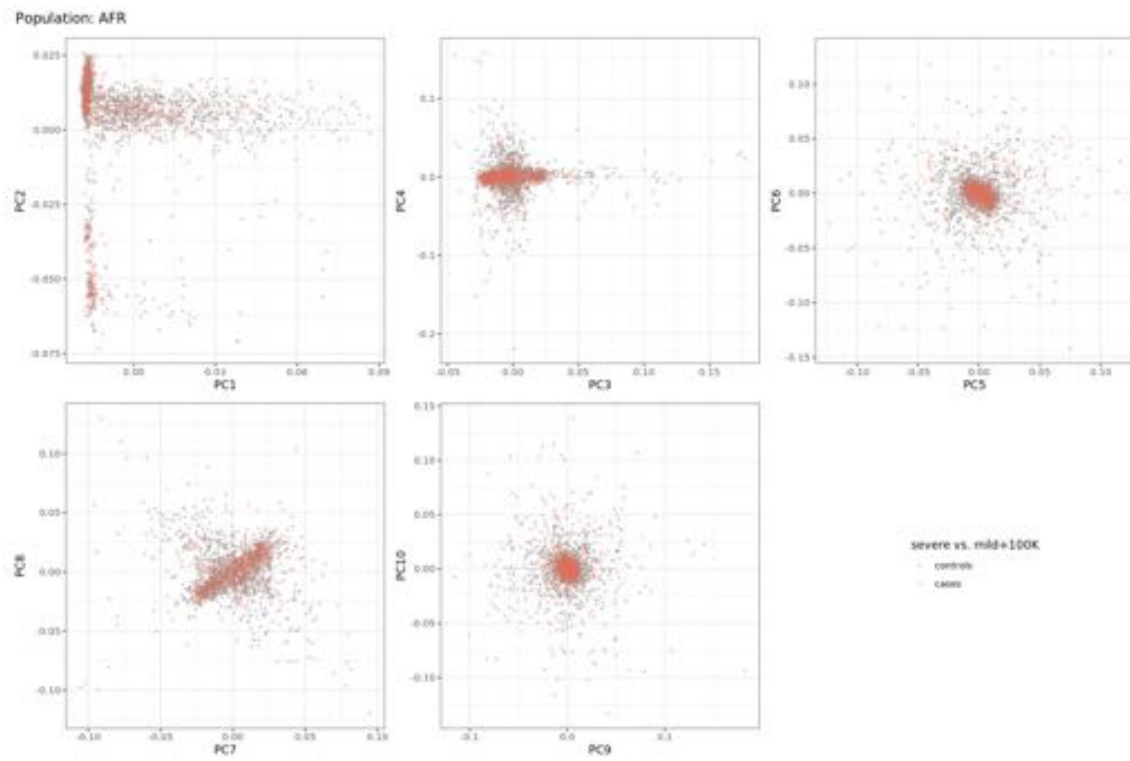

Figure 7: AFR PCs 1-10 for severe (cases) and mild + 100K individuals (controls).

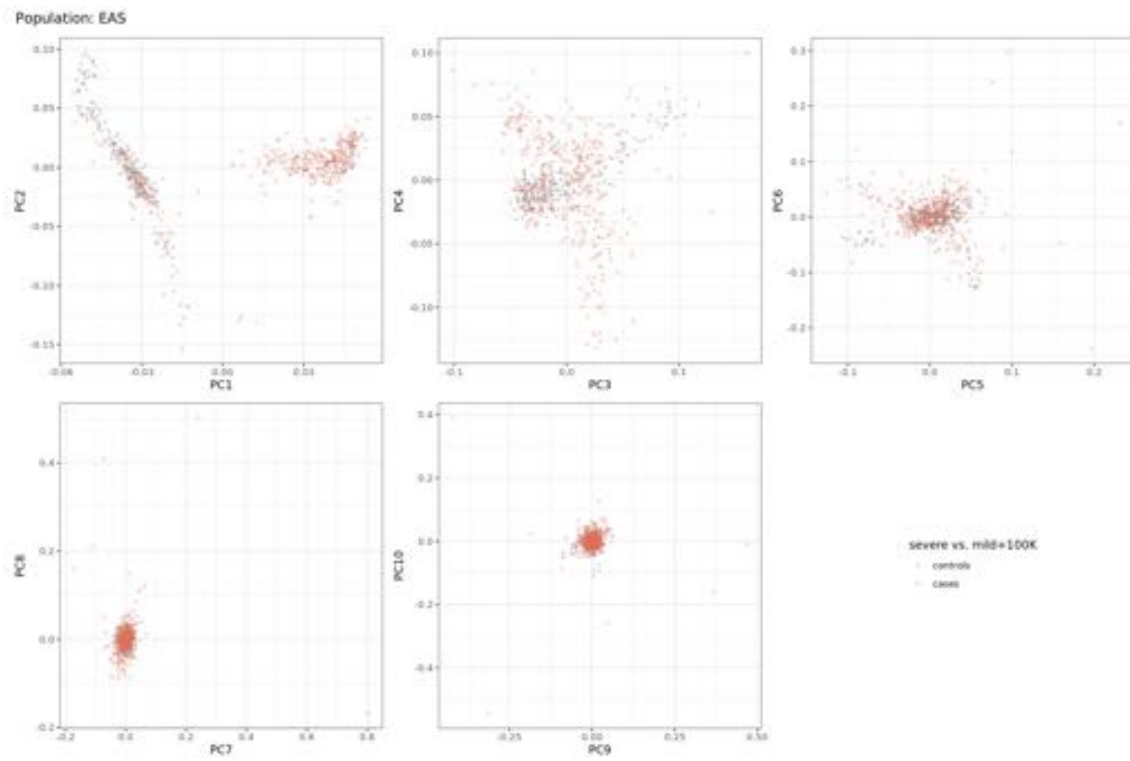

Figure 8: EAS PCs 1-10 for severe (cases) and mild + 100K individuals (controls).

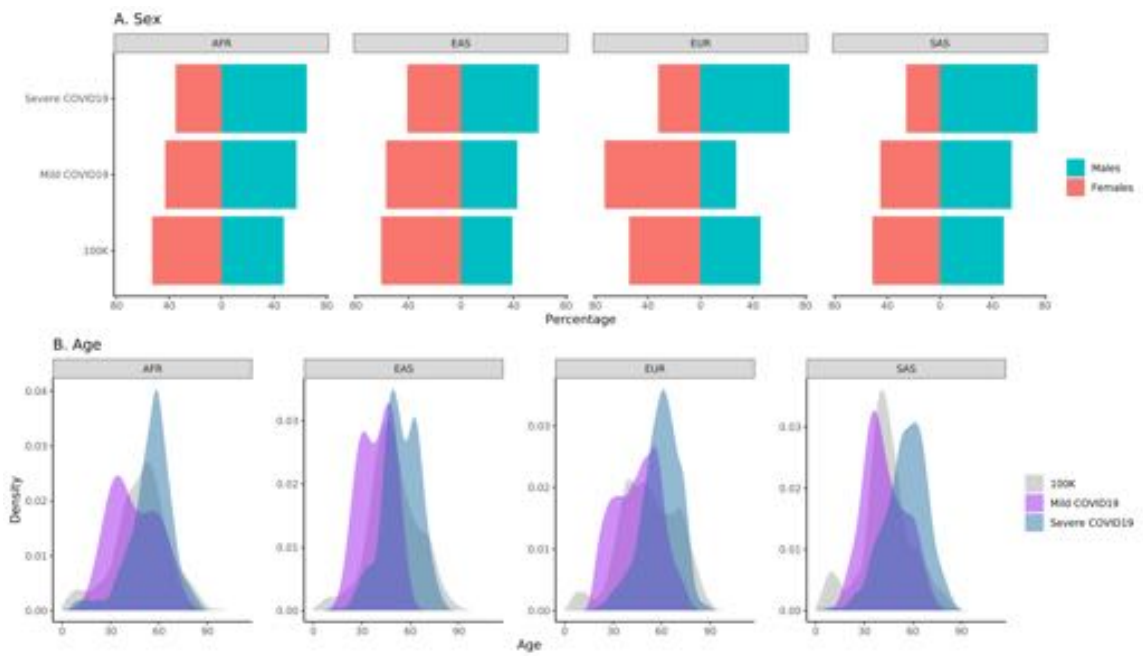

Figure 9: Breakdown of sex and age for severe, mild and 100K cohorts.

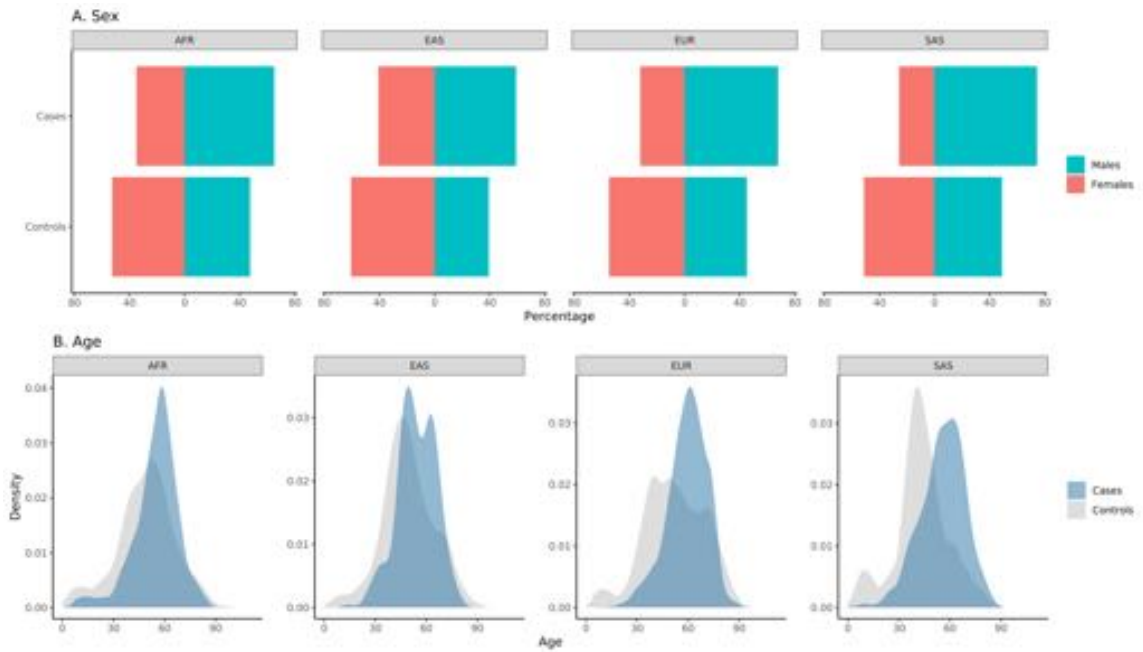

Figure 10: Breakdown of sex and age for cases and controls of the severe (cases) vs. mild+100K (controls) cohorts.

| Predicted Ancestry | <i>covid-severe</i> | <i>covid-mild</i> | <i>100K-Genomes (not realigned)</i> | <i>100K-Genomes (realigned)</i> |
|--------------------|---------------------|-------------------|-------------------------------------|---------------------------------|
| EUR                | 5,989               | 1,507             | 38,325                              | 3,059                           |
| SAS                | 788                 | 95                | 3379                                | 319                             |
| AFR                | 440                 | 14                | 1025                                | 311                             |
| EAS                | 274                 | 14                | 280                                 | 72                              |

Table 2: Breakdown of the cohorts included in this study by predicted ancestry, after sample QC and removal of related individuals.

## 41 GWAS

### 42 Per-population GWAS results

| Population | No. of ld-pruned variants | Bonferroni-corrected P-value threshold |
|------------|---------------------------|----------------------------------------|
| EUR        | 2264479                   | 2.2e-08                                |
| SAS        | 2729540                   | 1.8e-08                                |
| AFR        | 5370001                   | 9.3e-09                                |
| EAS        | 1264431                   | 4e-08                                  |

Table 3: The Bonferroni-corrected  $P$ -values for the per-population GWAS analyses. The  $P$ -value significance threshold was calculated by estimating the effective number of tests. After selecting the final filtered set of tested variants for each population, we LD-pruned in a window of 250Kb and  $r^2 = 0.8$  with plink 1.9.

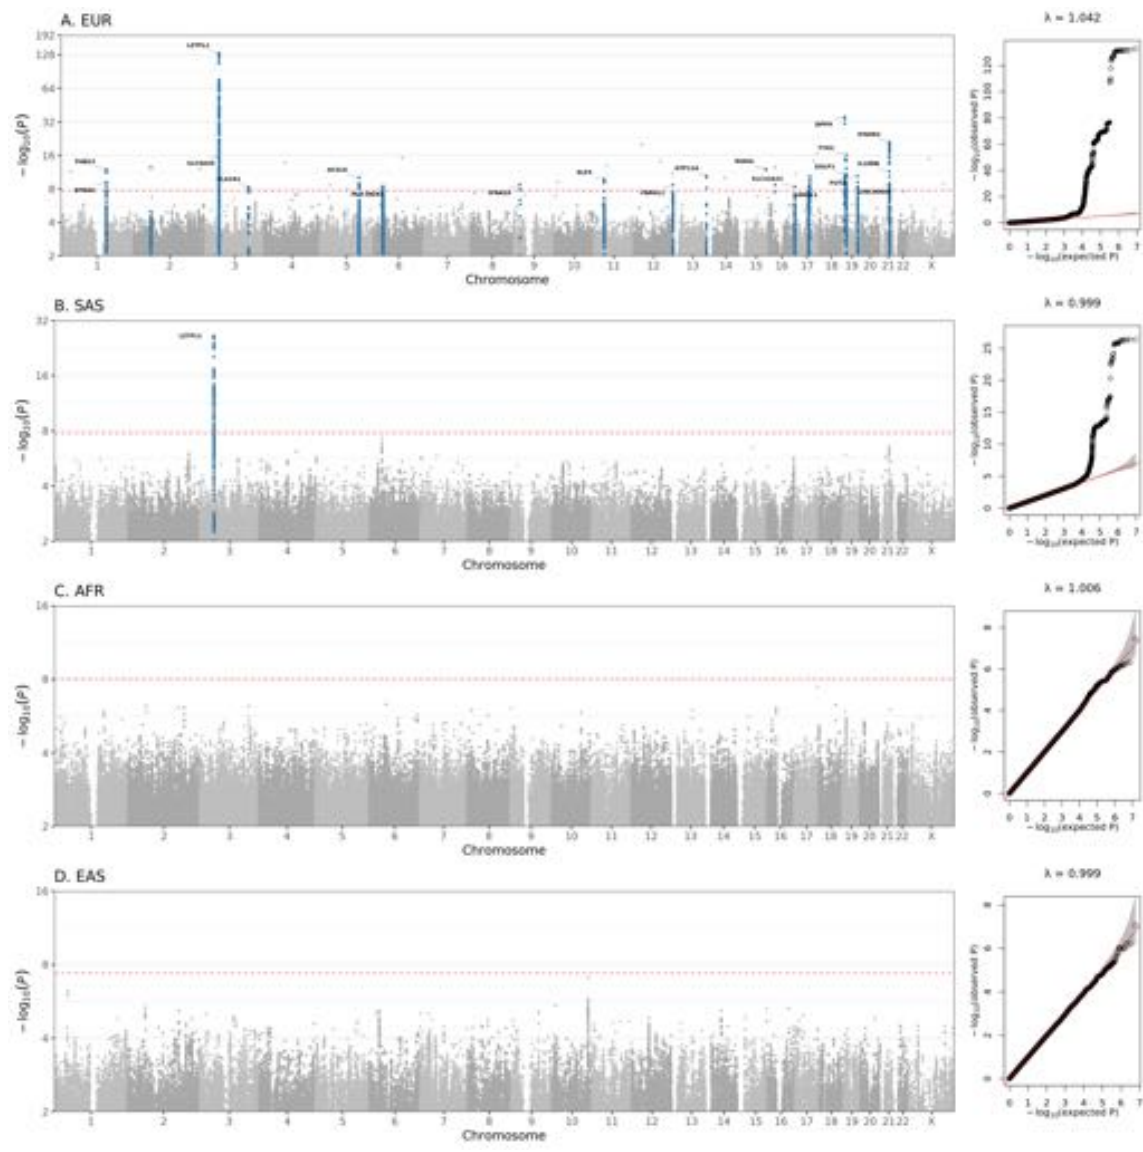

Figure 11: Manhattan plots showing GWAS results for each population cohort. The highlighted results with blue are the variants that are LD clumped ( $r^2=0.1$ ,  $P_2=0.01$  in each population) with each lead variant. Red dashed line is the Bonferroni-corrected  $P$ -value according to the number of estimated independent tests in each population.

43 LD-based validation of lead GWAS signals

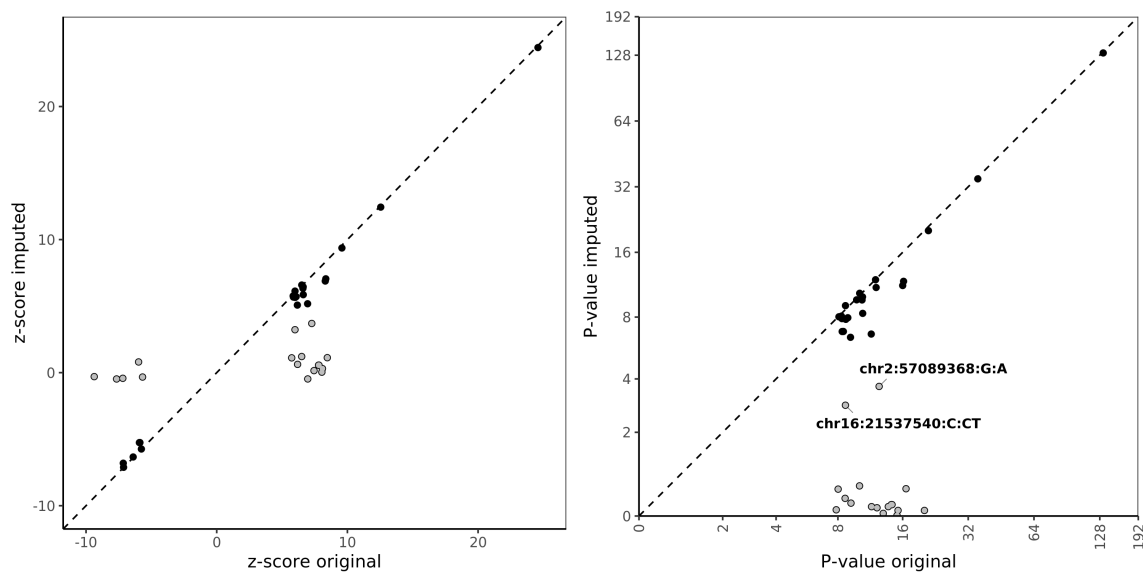

Figure 12: Original and imputed zscores and respective  $P$ -values with leave-one procedure for lead variants of the EUR analysis. Variants with low support from neighbouring variants are highlighted with grey.



44 Association signal forest plots

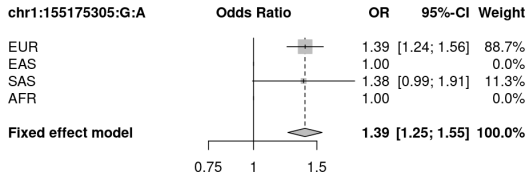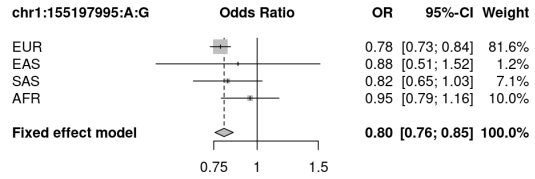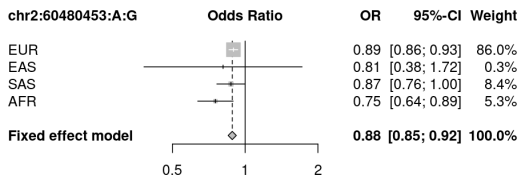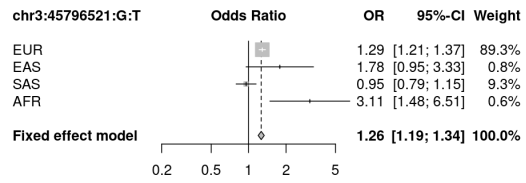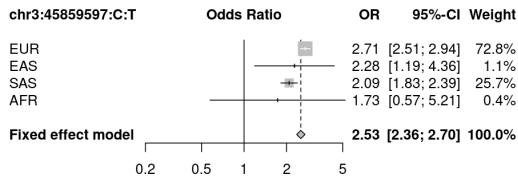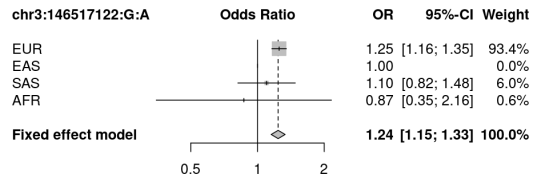

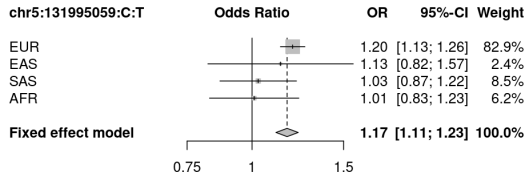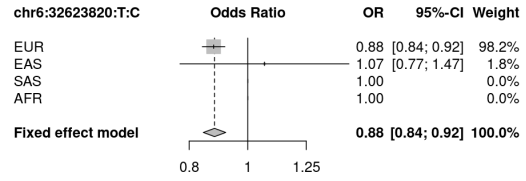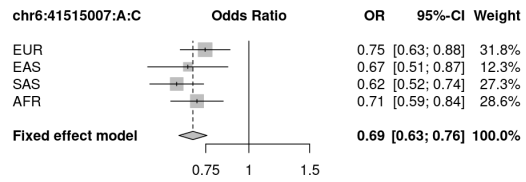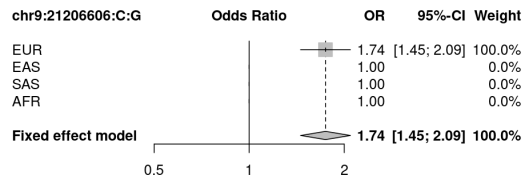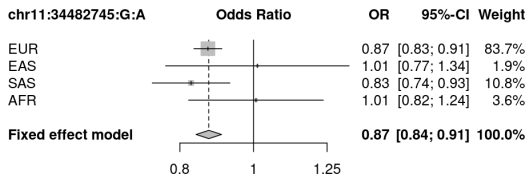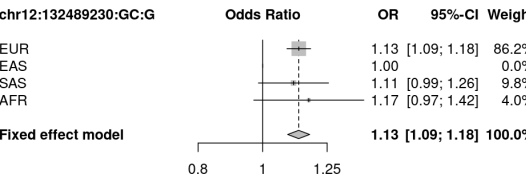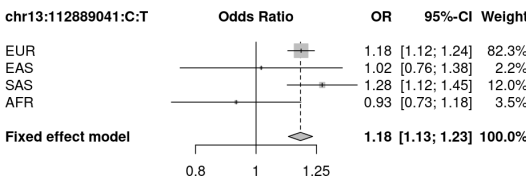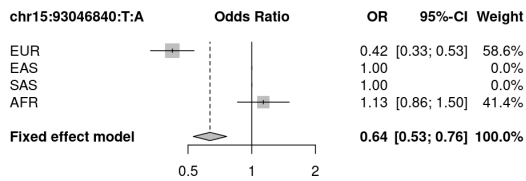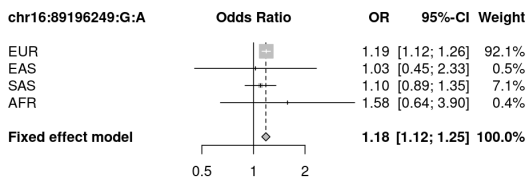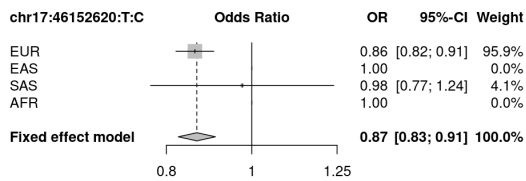

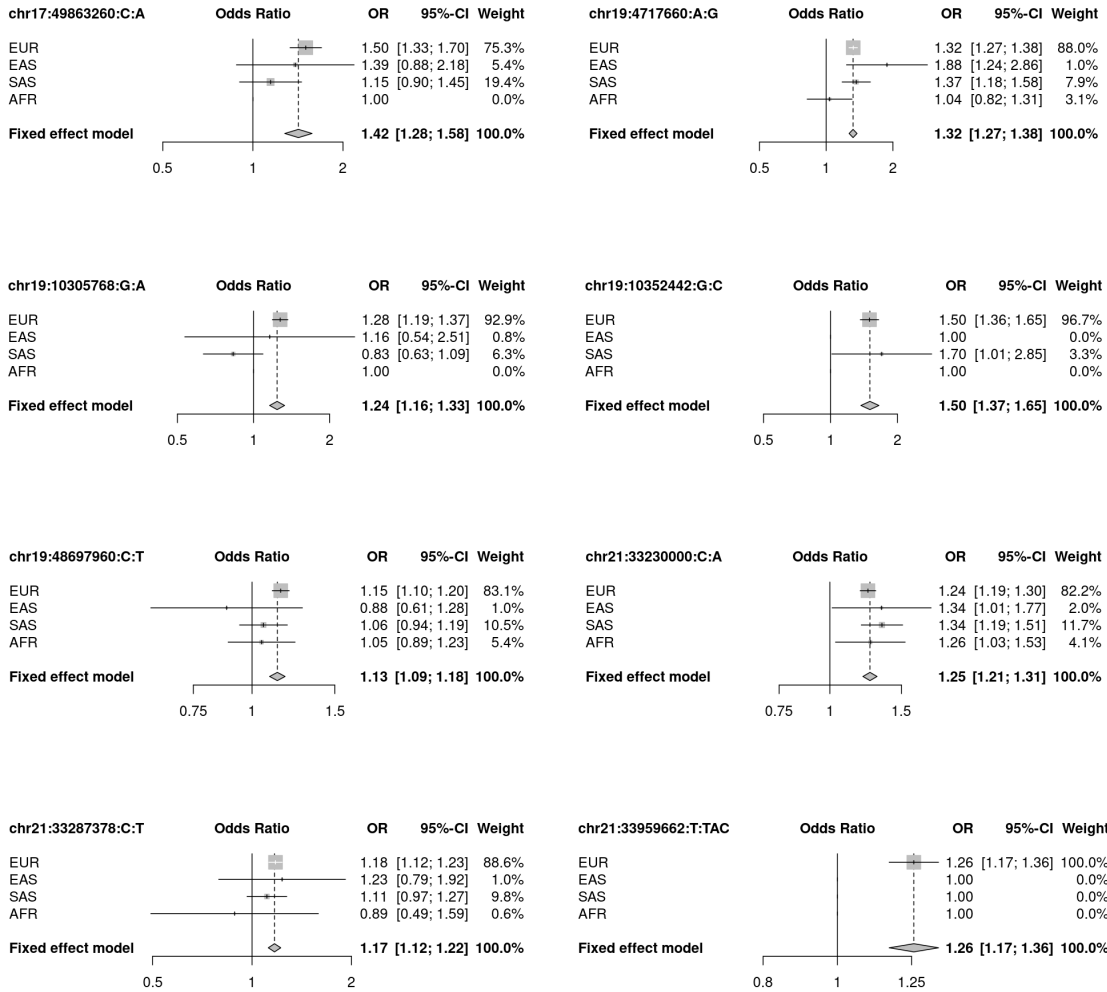

Figure 13: Forest plots for all lead signals.

45 Replication forestplots

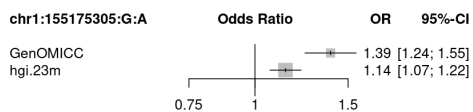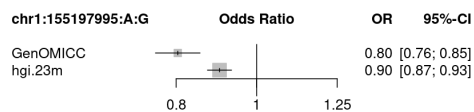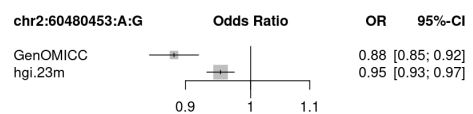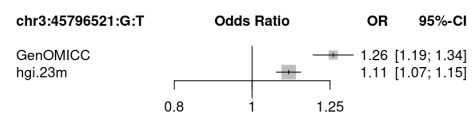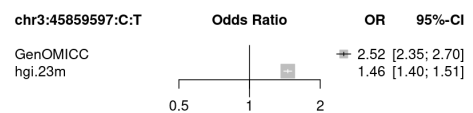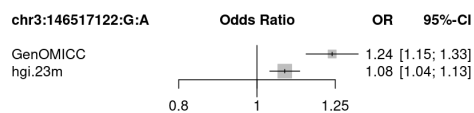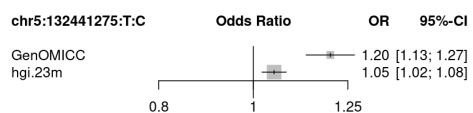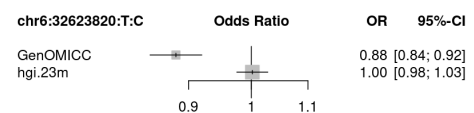

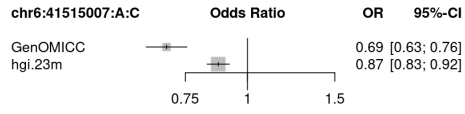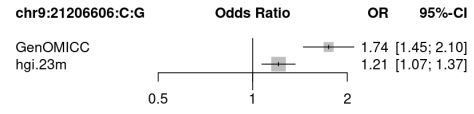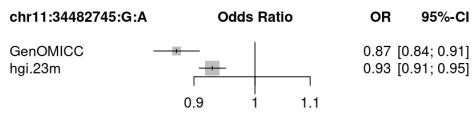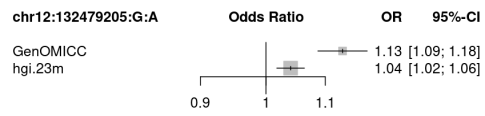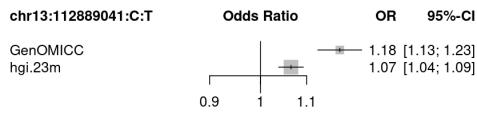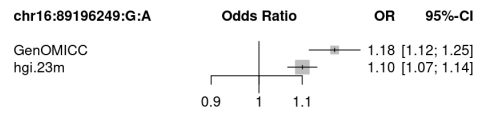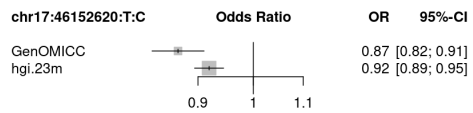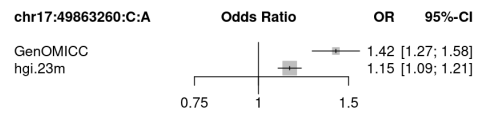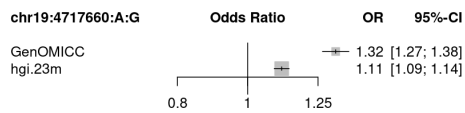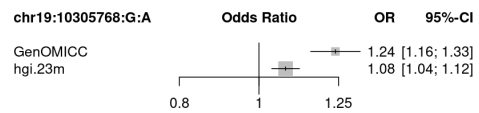

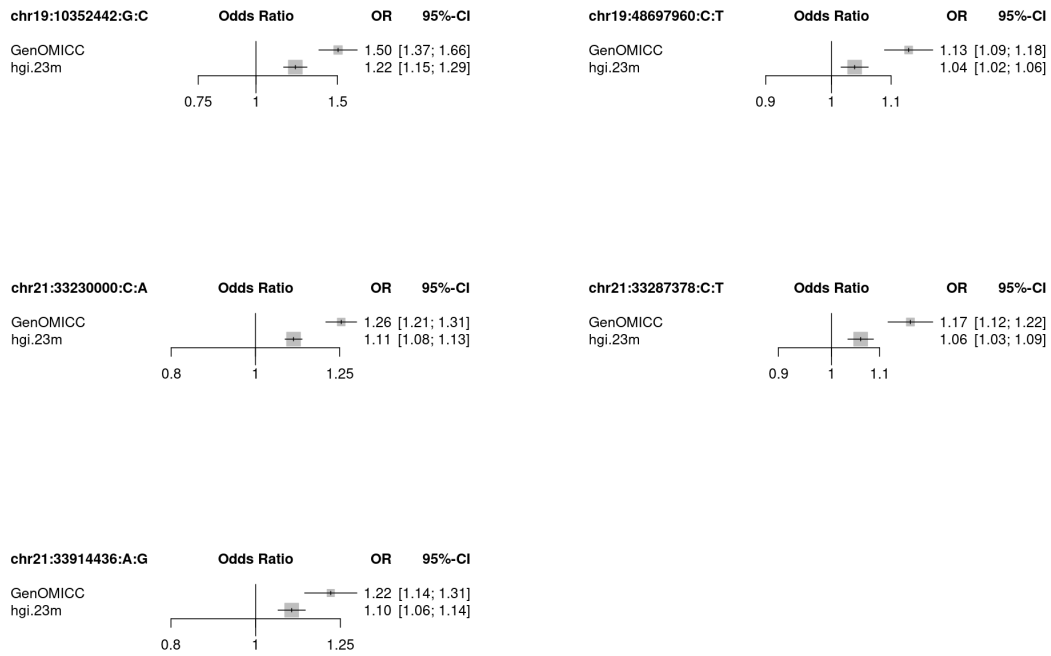

Figure 14: Forest plots comparing the Odds ratios for all the lead signals with a combined meta-analysis of HGI freeze 6 B2 and 23andMe. The HGI summaries were produced with new meta-analysis that removed the GENOMICC cases to ensure statistical independence. The Genomics England 100K participants (i.e, controls) summary data contributed to HGI C2 analysis and not B2 used here.

## 46 Genetic fine-mapping and colocalisation

47 In the EUR ancestry group, we found two independent signals for the association at 1q22. The lead  
48 variant for the first fine-mapped locus is a synonymous variant in *EFNA4* (chr1:155066988:C:T),  
49 while the lead variant of the second independent signal (chr1:155197995:A:G) is an intronic variant in  
50 *THSB3*, in close proximity to the most significant single-tissue eQTLs for *MUC1* (chr1:155199564:G:T,  
51 chr1:155199139:G:A) in GTEx v8, which are also in the same intronic region. Fine mapping the  
52 trans-ancestry meta-analysis revealed a third independent signal at this locus, with the lead variant  
53 (chr1:155175305:G:A, rs7528026, OR:1.39, 95% CIs:[1.24-1.55]) being in an intron of *TRIM46*. This  
54 variant is an sQTL and eQTL for *MUC1* in lung and whole blood tissue, respectively, in GTEx  
55 v8<sup>1</sup> (Supplementary File TWAS.xlsx).

56 Meta-analysis across genetically inferred ancestries revealed a novel locus at 2p16.1, with the lead  
57 variant (chr2:60480453:A:G, OR:0.88, 95% CIs:[0.85,0.92]) being in an intron of *BCL11A*.

58 We fine-mapped the signal in the 3p21.31 region, first reported by Ellighaus *et al.*,<sup>2</sup> into two  
59 independent associations. The lead variant for the first association is in the 5' UTR region  
60 of *SLC6A20* (chr3:45796521:G:T, OR:1.29, 95% CIs:[1.21,1.37]). The second association in the  
61 chr3p21.31 region is seen at genome-wide significance in both the EUR and SAS cohorts, with two of  
62 the three highest ranked variants in the fine-mapped region in the two populations shared between  
63 the two cohorts (chr3:45818159:G:A, chr3:45859597:C:T) and residing in downstream and intronic  
64 regions of *LZTFL1*.

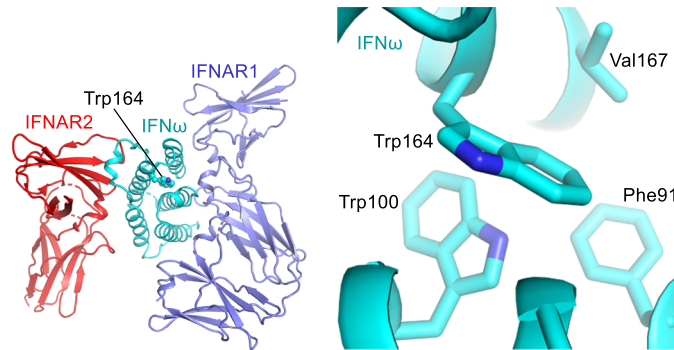

Figure 15: Structural predictions for impact of risk variant on IFNA10

65 The credible set for the 3q24 association included 9 variant and the lead variant (chr3:146517122:G:A,  
66 rs343320,p.His262Tyr, OR:1.24, 95% CIs [1.15-1.33]) is a missense variant in *PLSCR1*, predicted to  
67 be damaging by CADD (CADD:22.6).

68 At 5q31.1, the lead variant (chr5:131995059:C:T, rs56162149, OR:1.17, 95% CIs:[1.11,1.23]) is in an  
69 intron of *ACSL6*. The credible set for this locus contains 33 variants that span 484 kb including  
70 variants in genes *CSF2* and *IRF1-AS1*, with chr5:132075767:T:C being a missense variant in *CSF2*  
71 and chr5:131991772:C:G being missense in *ACSL6* and only intronic variants for *IRF1-AS1*.

72 The previously reported signal at 6p21.1, linked to *FOXP4*<sup>3</sup>, is stronger in the SAS cohort but has  
73 a consistent effect across ancestries ( $P_{het}=0.49$ ).

74 We fine mapped the signal at 9p21.3 to three variants with lead variant (chr9:21206606:C:G,  
75 rs28368148,p.Trp164Cys, OR:1.74, 95% CIs [1.45-2.09]) being a missense variant in IFNA10 that is  
76 predicted to be damaging by CADD (CADD:23.9) with potential functional impact Supplementary  
77 Figure 15.

78 The signal in the 11p13 region was fine-mapped to four variants (lead variant chr11:34482745:G:A,  
79 rs61882275, OR:0.87, 95% CIs:[0.84-0.91]), all four of which are in an intron of *ELF5*.

80 The credible set for the signal in the 12q24.33 region includes 24 variants spanning 95 kb, of which  
81 the lead (chr12:132489230:GC:G, rs56106917, OR:1.13, 95% CIs:[1.09-1.18]) lies upsdream *FBRSL1*.

82 The signal at 13q34 was fine-mapped to four variants, with lead variant (13:112889041:C:T, rs9577175,  
83 OR:1.18, 95% CIs [1.12-1.24]) lying downstream of *ATP11A* and upstream of *MCF2L* genes.

84 The association at 15q26.1 was fine mapped to two variants with lead variant (chr15:93046840:T:A,  
85 rs4424872, OR: 2.37, 95% CIs:[ 1.87-3.01] in an intron of *RGMA*. This a low frequency (allele  
86 frequency <1%) variant that was not replicated due to lack of coverage in the available replication  
87 data and further validation in an independent dataset is recommended.

88 The credible set for the association with lead variant at chr17:46152620:T:C (rs2532300, OR:1.16,  
89 95% CIs:[1.10,1.22]) includes 1430 variants and spans 658 kb, indicating an association with the  
90 known inversion haplotype at 17q21.31<sup>4</sup>.

91 We fine mapped the signal at 17q21.33 to five variants, with lead variant (chr17:49863260:C:A,  
92 rs3848456, OR:1.5, 95% CIs:[1.33-1.70] residing in a regulatory element (ENSR00001010694) 15.5  
93 kb upstream of the *TAC4* gene.

94 In the 19p13.3 region, which we reported in 2020,<sup>5</sup> we fine-mapped the signal to a single variant in  
95 *DPP9* (chr19:4717660:A:G). This variant is a missense variant in transcript ENST00000599248 but  
96 intronic in other transcripts including the MANE transcript (ENST00000262960.14).

97 In the 19p13.2 region, where we previously reported a variant associated with *TYK2*,<sup>5</sup> we find two  
98 independent signals, one of which is a damaging missense variant in *TYK2*, chr19:10352442:G:C  
99 (rs34536443, OR:1.50, 95% CIs:[1.36,1.65], CADD=25.1), and the second is an intronic variant of  
100 *ZGLP1* (19:10305768:G:A, rs73510898, OR:1.28, 95% CIs:[1.19,1.37]).

101 The signal at 19q13.33 was fine-mapped to ten variants, with the lead variant (chr19:48697960:C:T,  
102 rs368565, OR:1.15, 95% CIs [1.1-1.2]) in an intron of *FUT2* and variant chr19:48705753:T:C (rs503279)  
103 being in the 3' UTR of the MANE transcript for this gene.

104 In the 21q22.11 region, we described previously,<sup>5</sup> fine-mapping revealed three independent signals, for  
105 which the lead variants reside in the 5' UTR of *IFNAR2* (chr21:33230000:C:G,rs17860115, OR:1.24,  
106 95% CIs:[1.19-1.30], CADD=10.1), an intronic region of *IL10RB* (chr21:33287378:C:T, rs8178521,  
107 OR:1.18, 95% CIs:[1.12,1.23]) and in a downstream long non-coding RNA (chr21:33959662:T:TAC,  
108 rs35370143, OR:1.26, 95% CIs:[1.17,1.36]).



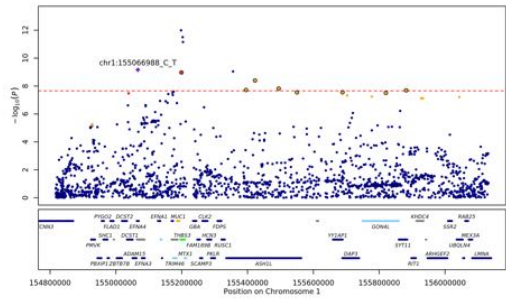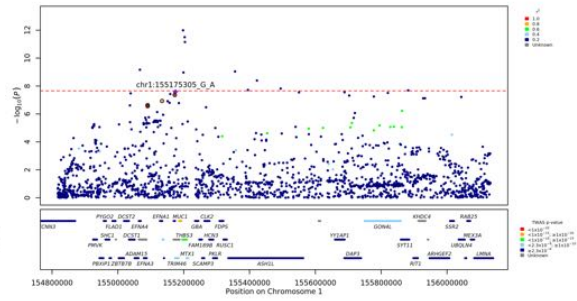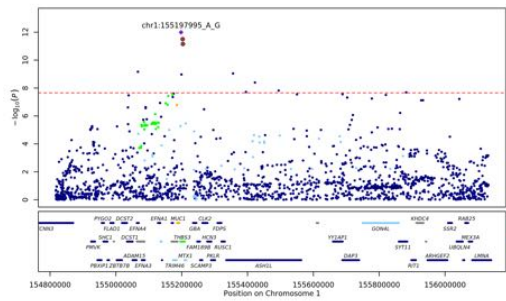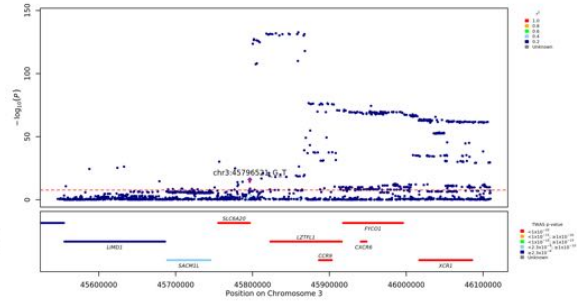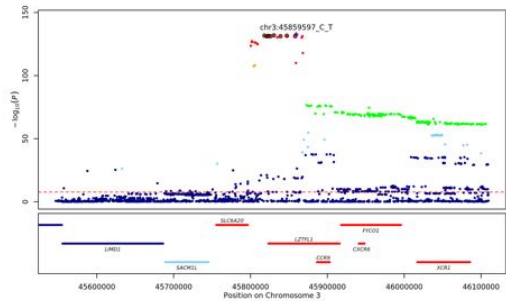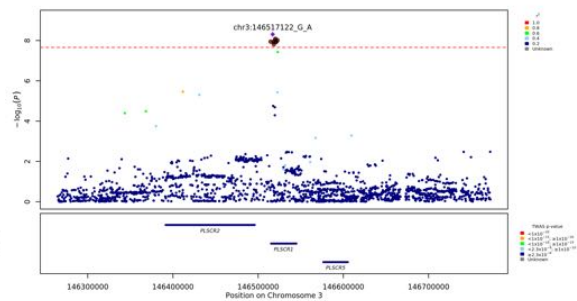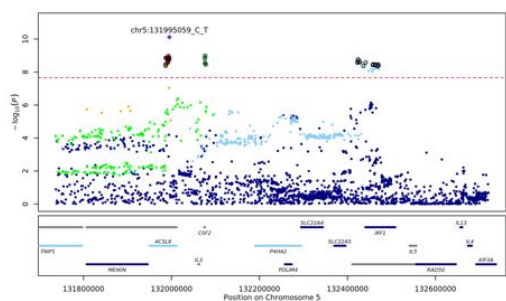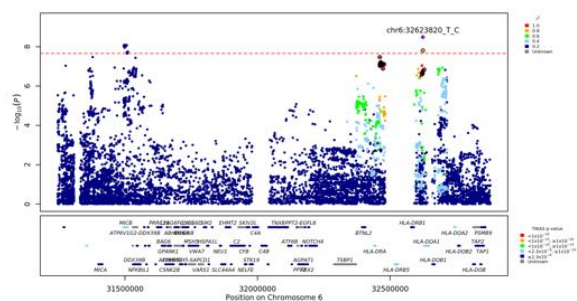

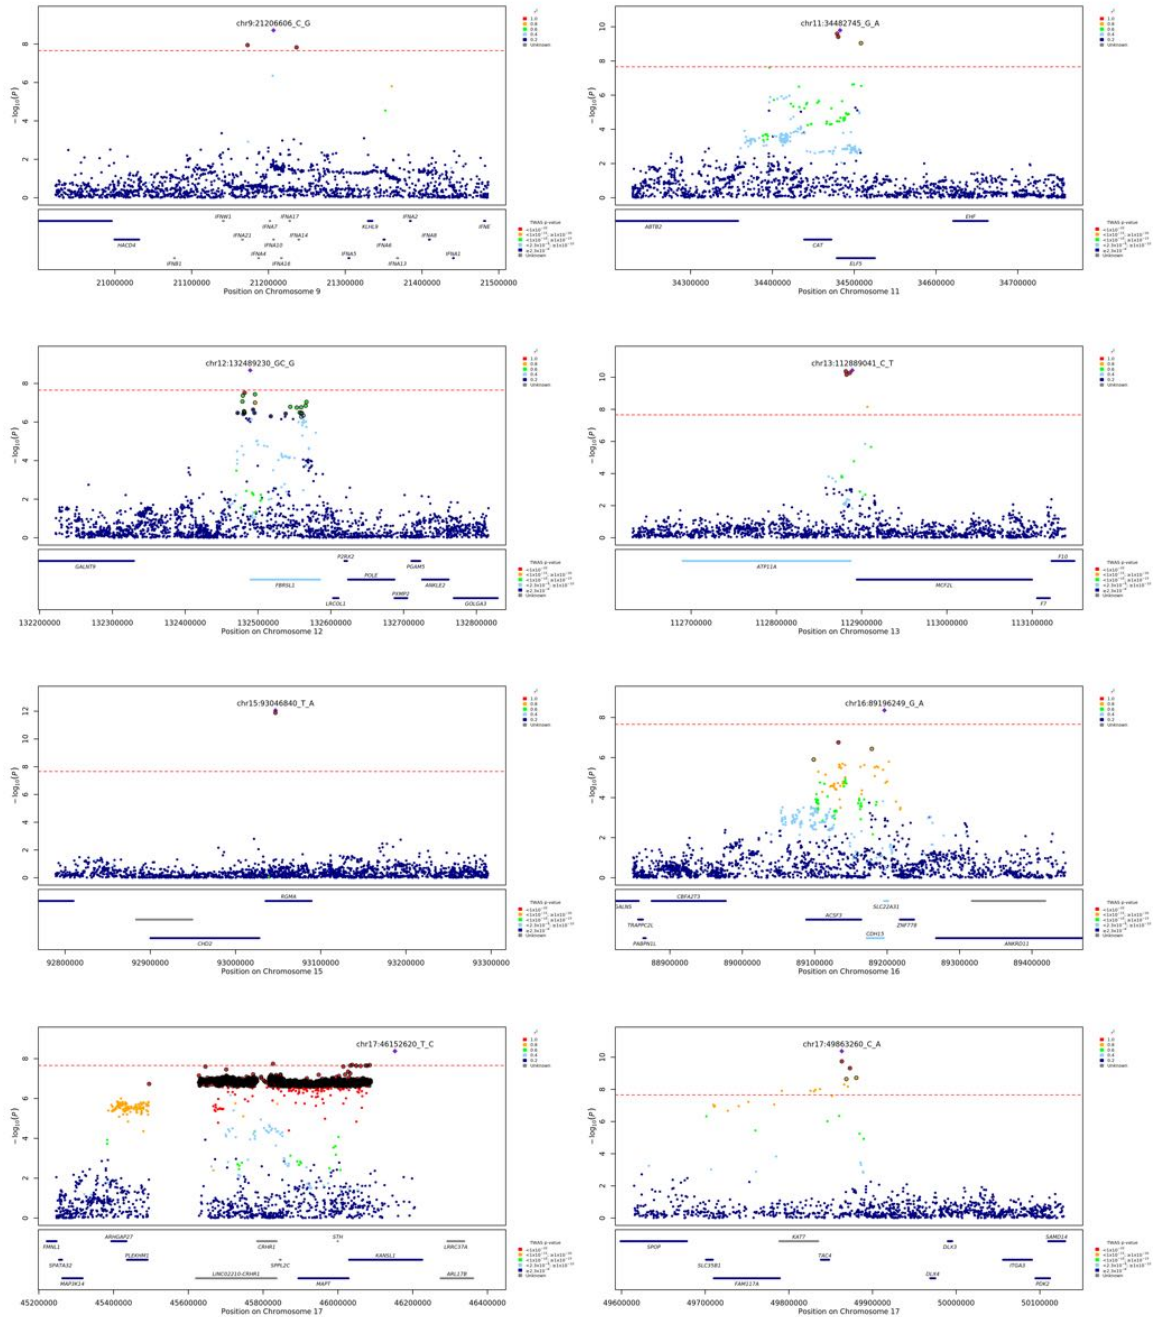

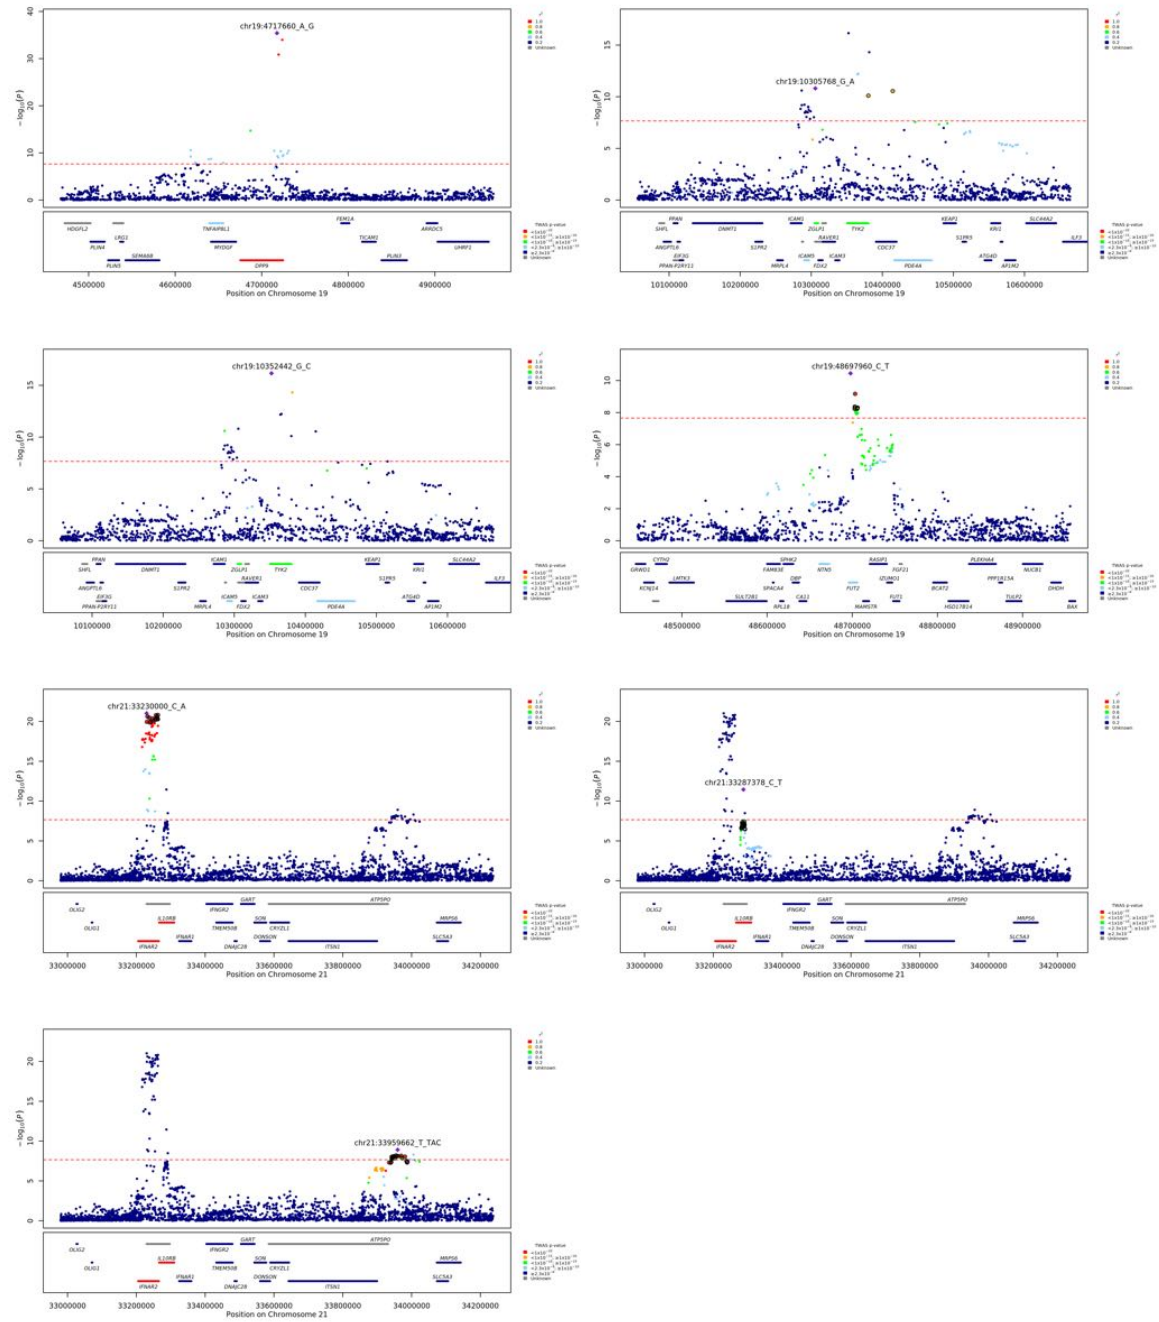

Figure 16: Locuszoom figures for the signals found in the per-population analyses. Upper panels show lead signals and LD calculated in EUR with all other loci in the window shown. Credible sets for each displayed signal that were inferred with susieR are displayed with outline black circles. On the bottom panels an hg38 gene track is displayed with colors matching significance from the metaTWAS analysis in discrete bins shown.

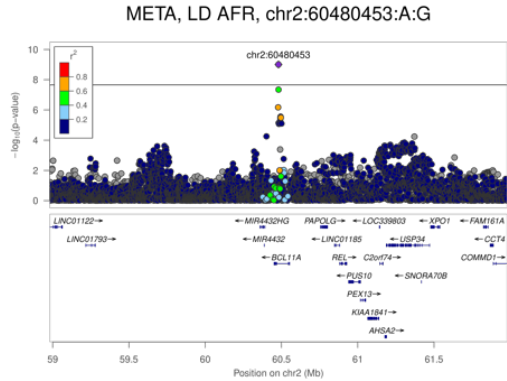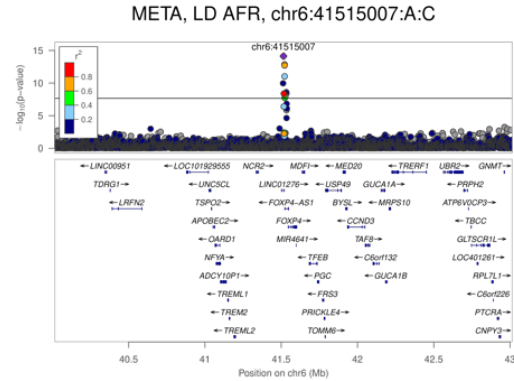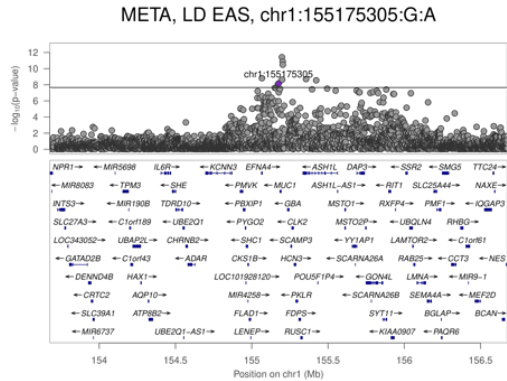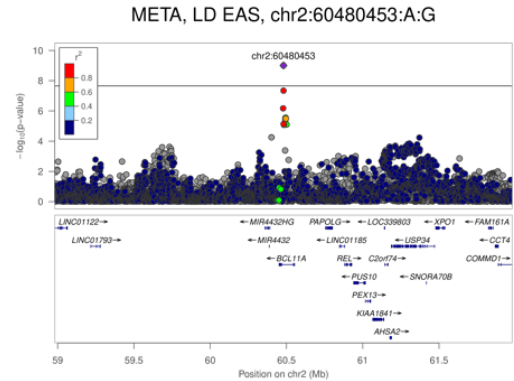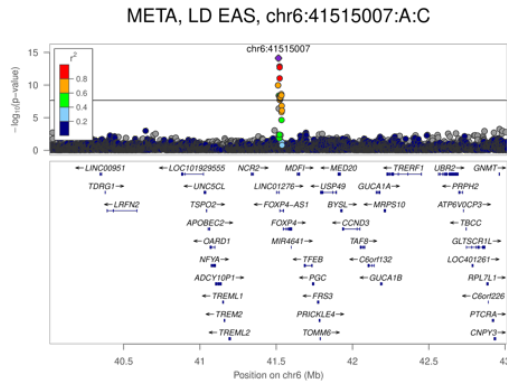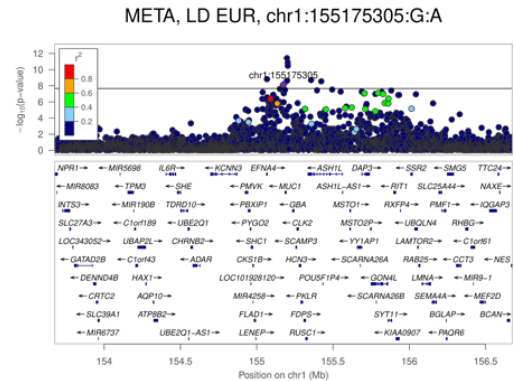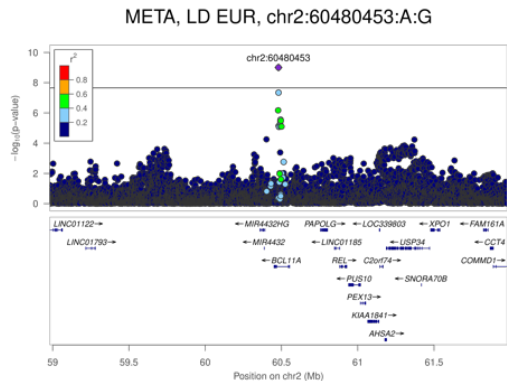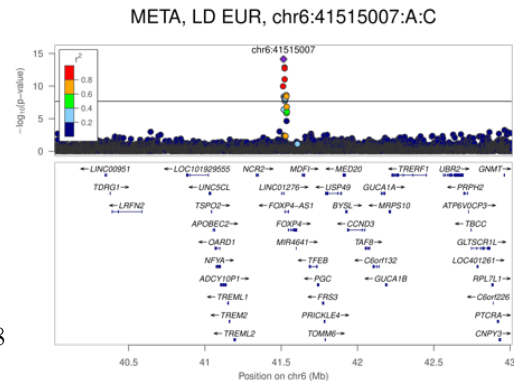

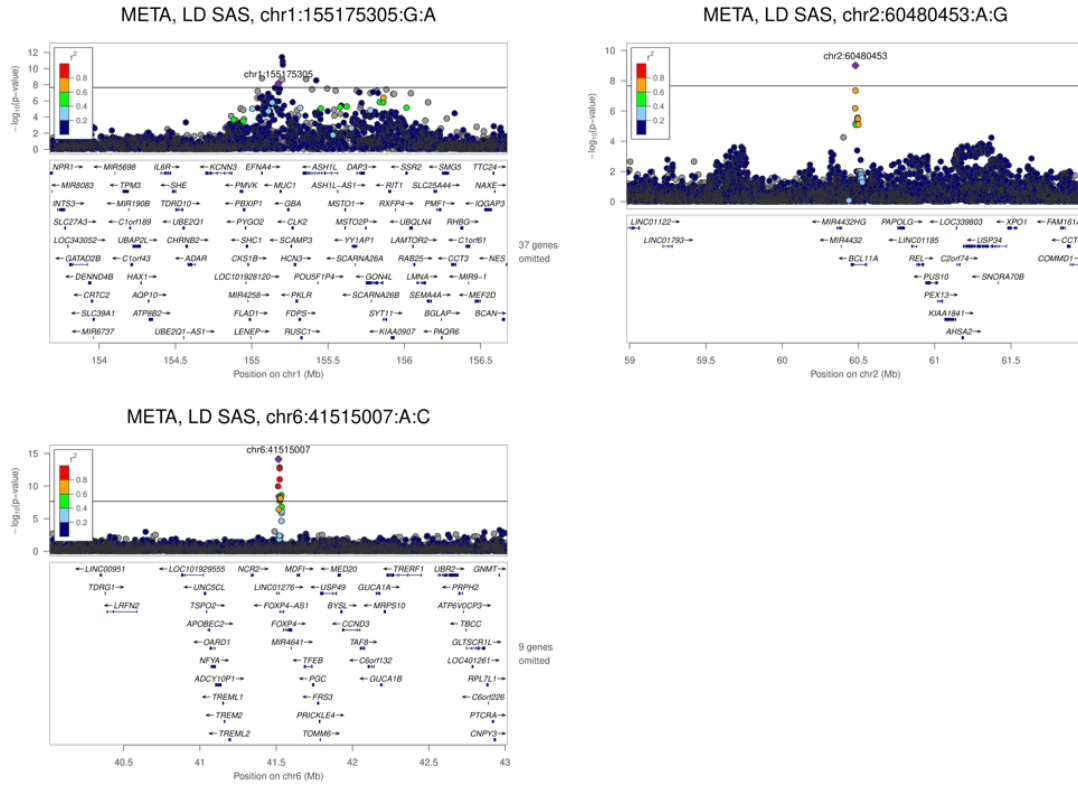

Figure 17: Locuszoom figures for the transethnic meta-analysis signals with different panels for LD calculated in the four populations of this study (AFR, EAS, EUR, SAS).

109 **Stratified analysis**

110 We performed sex- (< 60 vs. ≥ 60) and age-stratified analyses. We did not obtain significant  
111 evidence for sex- specific effects (Supplementary Figure 18). The locus at chr3:45801750:G:A  
112 (rs13071258) in the European population had a significantly stronger effect in the younger age group  
113 ( $OR = 3.34, 95\%CI = 2.98 - 3.75$  vs.  $OR = 2.1, 95\%CI = 1.88 - 2.34$ ).

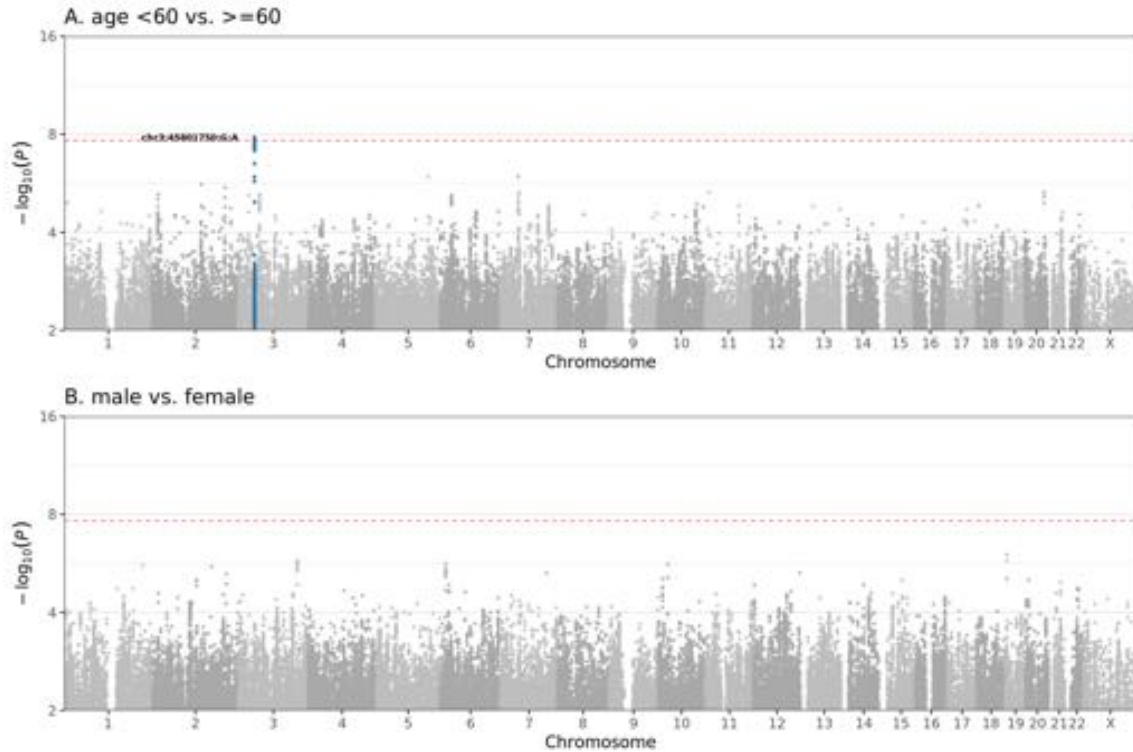

Figure 18: Manhattan plot for  $t$ -test  $P$ -values obtained from comparison of stratified GWAS analyses by age and sex. GWAS analyses were run for stratified subsets of the severe vs. mild+100K analysis for individuals with (A) age >60 vs. ≥60 and (B) males vs. females. For each analysis we then performed a  $t$ -test comparing between-group effect sizes per variant. Red dashed line corresponds to Bonferroni-corrected  $P$ -value =  $2 \times 10^{-8}$ .



114 TWAS

115 eQTL TWAS

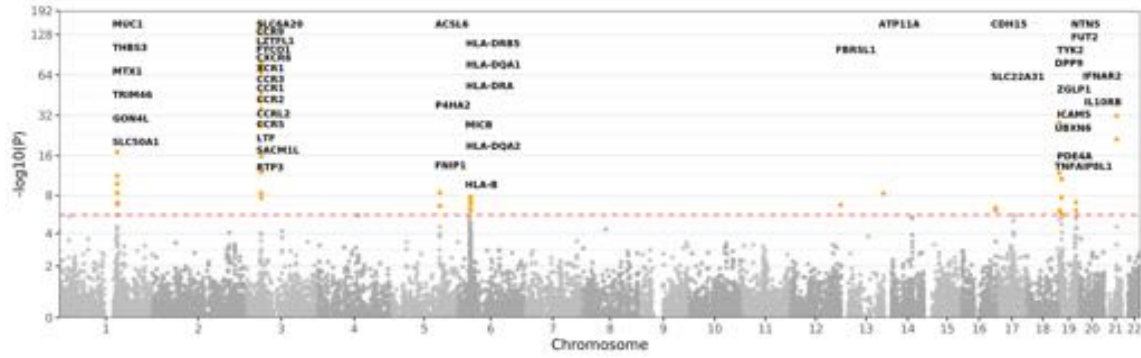

Figure 19: TWAS results from meta-analysis of eQTL models from all tissues in GTExv8. All significant genes at  $P < 2.3 \times 10^{-6}$  (red dashed line) are annotated.

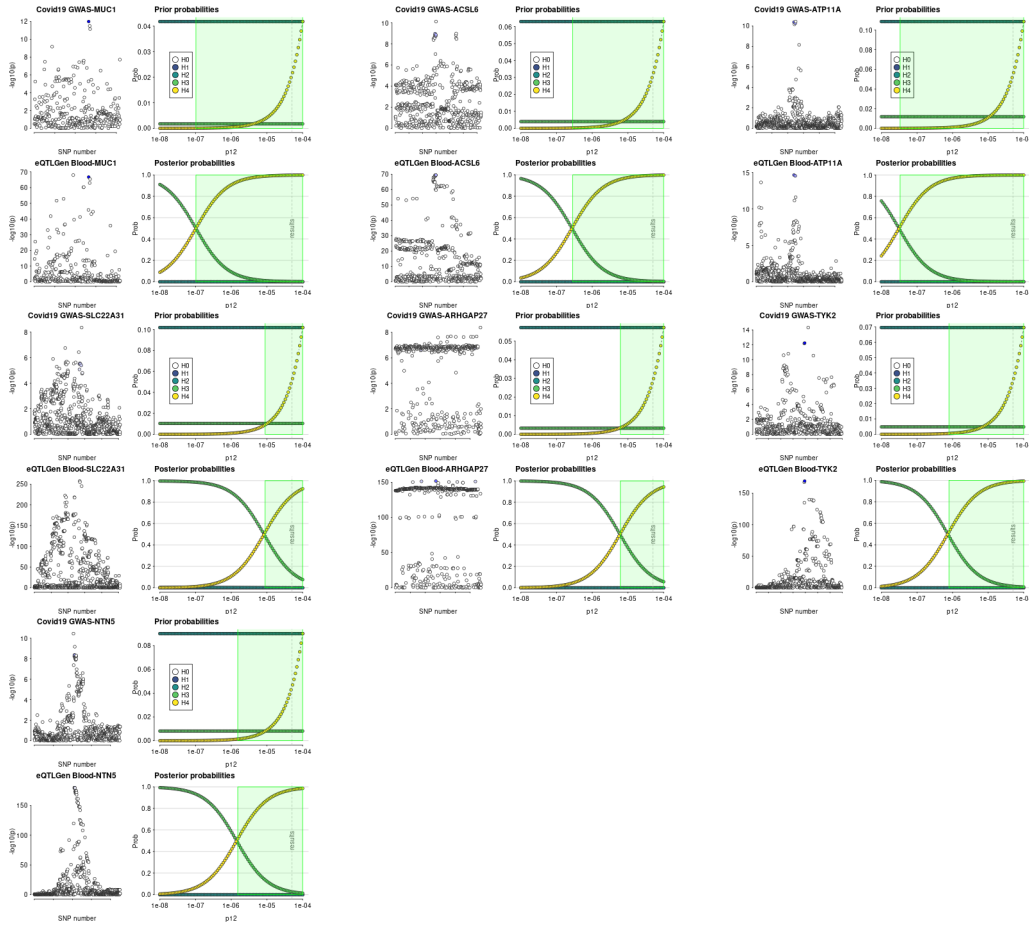

Figure 20: Sensitivity analysis for colocalisation of TWAS-significant loci in blood (eQTLgen data) with GWAS signals. Evidence for the following hypotheses is plotted across a range of prior probabilities: H0 - neither trait has a genetic association in the region; H1 - only trait 1 has a genetic association in the region; H2 - only trait 2 has a genetic association in the region; H3 - both traits are associated, but with different causal variants; H4 - both traits are associated and share a single causal variant.



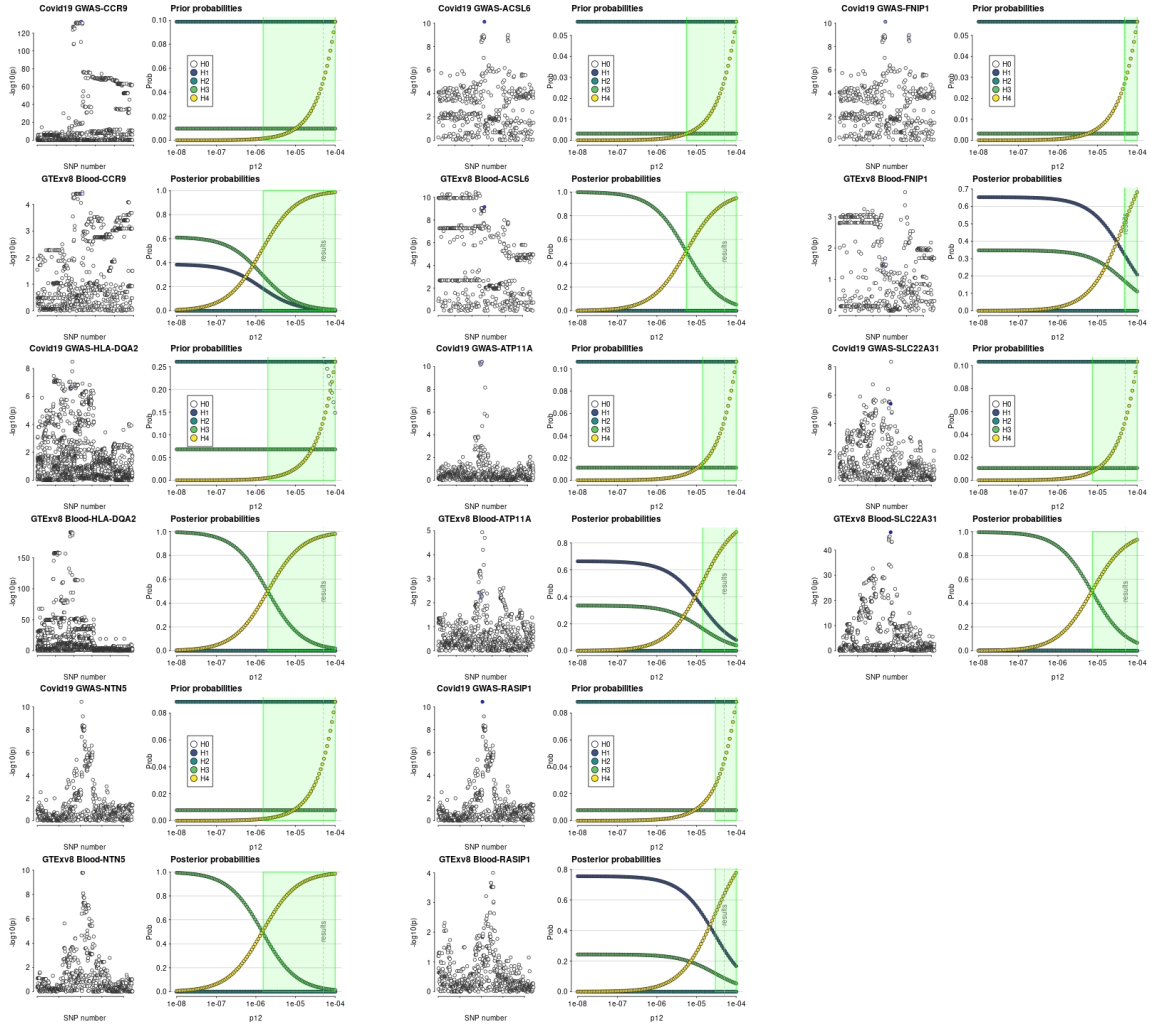

Figure 21: Sensitivity analysis for colocalisation of TWAS-significant loci in blood (GTExv8 data) with GWAS signals. Evidence for the following hypotheses is plotted across a range of prior probabilities: H0 - neither trait has a genetic association in the region; H1 - only trait 1 has a genetic association in the region; H2 - only trait 2 has a genetic association in the region; H3 - both traits are associated, but with different causal variants; H4 - both traits are associated and share a single causal variant.

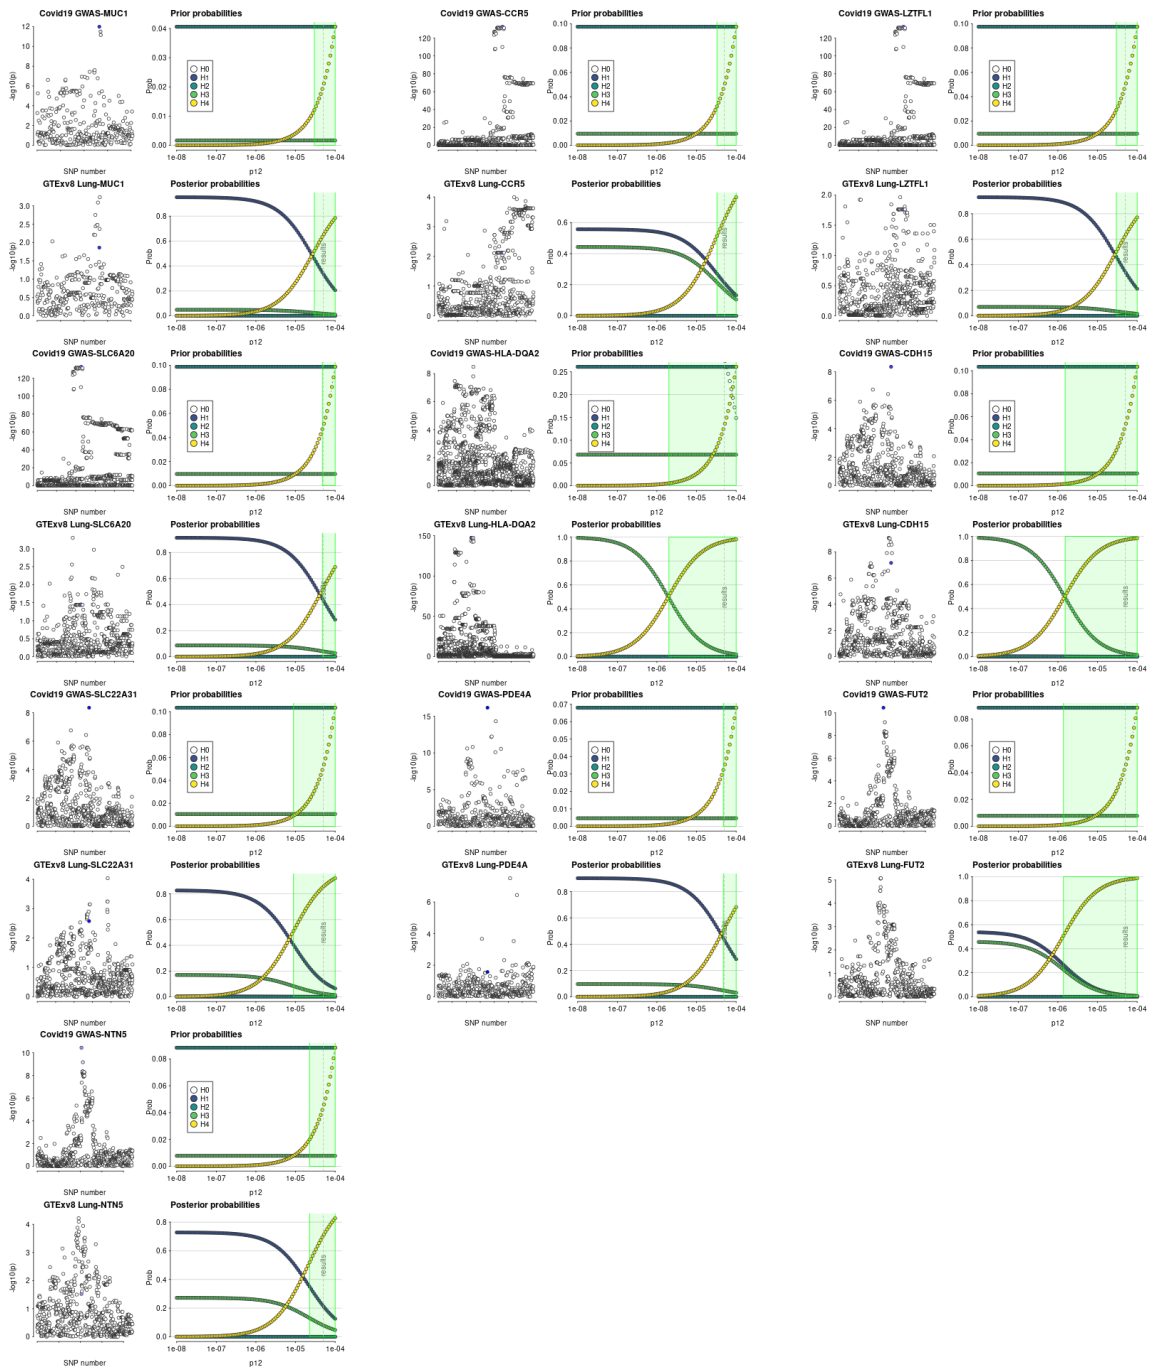

Figure 22: Sensitivity analysis for colocalisation of TWAS-significant loci in lung (GTExv8 data) with GWAS signals. Evidence for the following hypotheses is plotted across a range of prior probabilities: H0 - neither trait has a genetic association in the region; H1 - only trait 1 has a genetic association in the region; H2 - only trait 2 has a genetic association in the region; H3 - both traits are associated, but with different causal variants; H4 - both traits are associated and share a single causal variant.

## 117 **Aggregate variant testing (AVT)**

118 Aggregate variant testing on aggCOVID\_v4.2 was performed using SKAT-O as implemented in  
119 SAIGE-GENE v0.44.5<sup>6</sup>. Variant and sample QC for the preparation of the aggregate files has been  
120 described elsewhere. In addition, the following filters were applied to the masked aggregate dataset:

- 121 • Bi-allelic SNPs only
- 122 • Minor allele frequency < 0.005
- 123 • Site wide missingness < 0.05
- 124 • Differential missingness between cases and controls, mid-p value < 10<sup>-5</sup>

125 All the variants in the dataset were annotated using VEP v99.

## 126 **Masks and Model**

127 Two functional annotation masks were applied on top of the filters detailed. The first is a strict  
128 putative loss of function (*pLoF*) filter, where only variants that are annotated by Loftee as high  
129 confidence loss of function are included. The second is a more lenient filter (*missense*) where all  
130 variants from the strict filter are included, together with all variants that have a consequence of  
131 missense or worse as annotated by VEP, with a CADD\_PHRED score of  $\geq 10$  (CADD version 1.5).  
132 The covariates used in the model were the same as for the single variant analysis: *sex*, *age*, *age*<sup>2</sup>,  
133 *age \* sex* and 20 (population-specific) principal components generated from common variants (MAF  
134  $\geq 5\%$ ).

135 The tests were run separately by genetically predicted ancestry, on all protein-coding genes as  
136 annotated by Ensembl.

## 137 **AVT results**

138 Supplementary table 4 shows the number of tested genes per mask per predicted ancestry. These  
139 numbers were used to apply a Bonferonni correction on the SKAT-O *P*-values from SAIGE-GENE  
140 on a per population basis. The *P*-value thresholds for gene-wide significance were taken as  $0.05/n * 2$ ,  
141 with *n* being the number of tested genes in that population, divided by 2 (the number of masks  
142 used). This makes the assumption that each gene was tested by both masks, which is conservative  
143 for the missense threshold.

| Cohort | Tested genes,<br>pLoF mask | <i>P</i> -value threshold,<br>pLoF mask | Tested genes,<br>missense mask | <i>P</i> -value threshold,<br>missense mask |
|--------|----------------------------|-----------------------------------------|--------------------------------|---------------------------------------------|
| EUR    | 7,352                      | 3.4e-06                                 | 18,631                         | 1.3e-06                                     |
| SAS    | 1,435                      | 1.7e-05                                 | 17,291                         | 1.4e-06                                     |
| AFR    | 763                        | 3.3e-05                                 | 16,125                         | 1.6e-06                                     |
| EAS    | 265                        | 9.4e-05                                 | 12,519                         | 2.0e-06                                     |

Table 4: Number of tested genes per mask per predicted ancestry, with *P*-values used to assess gene-wide significance.

144 No significant associations were found across any of the populations. Supplementary figure 23 shows  
145 the Manhattan and Q-Q plots for each predicted ancestry using the *pLoF* mask, and supplementary

146 figure 24 shows the Manhattan and Q-Q plots for each predicted ancestry using the *missense* mask.  
 147 Supplementary File AVTsuppinfo.xlsx, sheet A and sheet B, show the top ten genes by *P*-value for  
 148 each predicted ancestry and all combined ancestries, respectively.

149 Supplementary File AVTsuppinfo.xlsx, sheet C, shows the top genes that were highlighted as part of  
 150 the GWAS analysis, ranked by p value per predicted ancestry. Supplementary File AVTsuppinfo.xlsx,  
 151 sheet D shows the SKAT-O *P*-values for the 13 genes involved in the regulation of type I and III  
 152 interferon immunity that were implicated in severe COVID-19 pneumonia<sup>7</sup>, ranked by p value per  
 153 predicted ancestry.

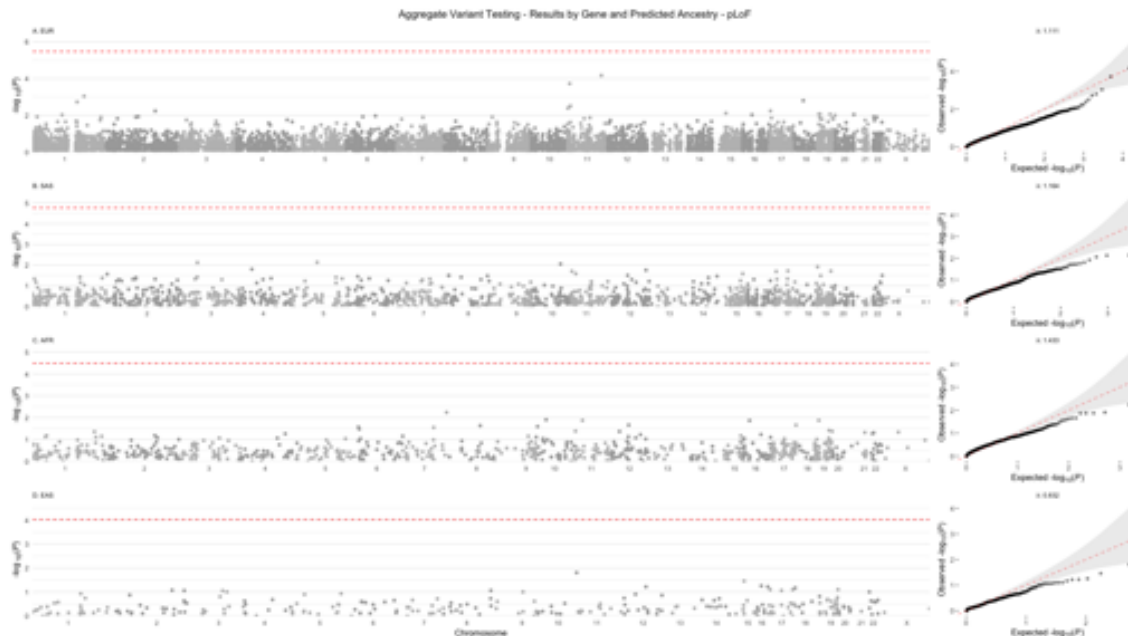

Figure 23: Gene-level manhattan and Q-Q plots per predicted ancestry for the *pLof* mask. Each point in the manhattan plot represents a gene. Panels from top to bottom are for EUR (A), SAS (B), AFR (C) and EAS (D). The red dashed lines indicate Bonferonni corrected "gene-wide" *P*-values (see Table 4).

## 154 HLA Inference and Association Tests

### 155 HLA imputation using HIBAG

156 HLA types were imputed at two field (4-digit) resolution for all samples within aggV2 and ag-  
 157 gCOVID\_v4.2 for the following seven loci: HLA-A, HLA-C, HLA-B, HLA-DRB1, HLA-DQA1,  
 158 HLA-DQB1, and HLA-DPB1 using the HIBAG package in R<sup>8</sup>. We used ancestry specific pre-fit  
 159 classifiers trained on the Illumina 1M Duo genotyping array on individuals of either European,  
 160 Asian, and African ancestry dependent on the assigned ancestry of the sample in hand. The list of  
 161 HLA alleles represented in the reference panel is shown in Supplementary File HLAsuppinfo.xlsx

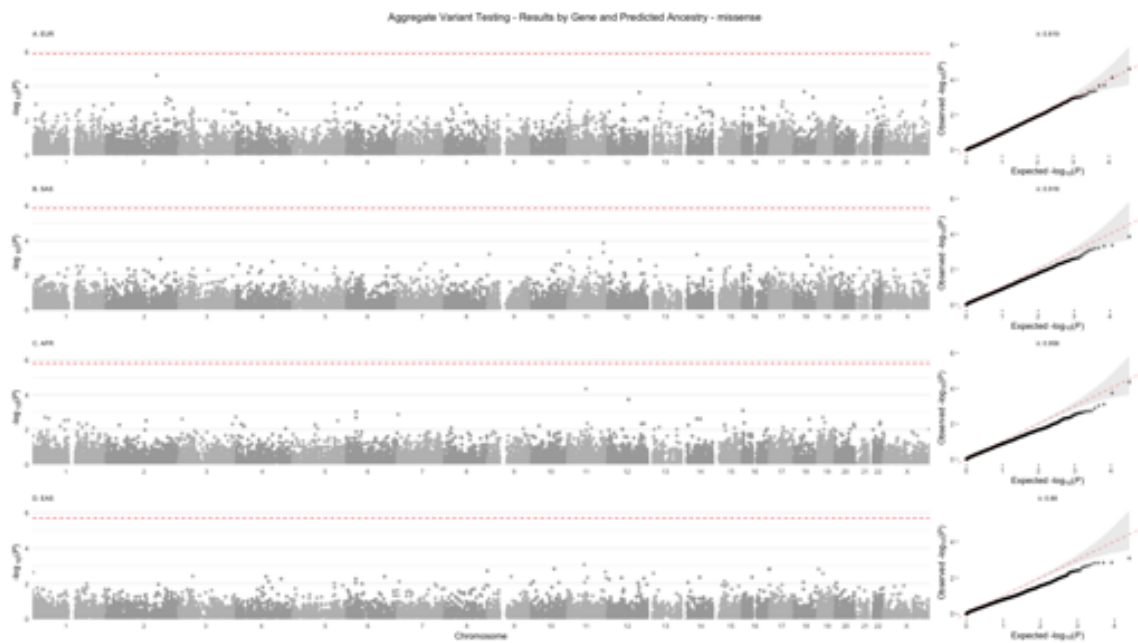

Figure 24: Gene-level manhattan and Q-Q plots per predicted ancestry for the *missense* mask. Each point in the manhattan plot represents a gene. Panels from top to bottom are for EUR (A), SAS (B), AFR (C) and EAS (D). The red dashed lines indicate Bonferonni corrected "gene-wide"  $P$ -values (see Table 4).

162 (Sheet A). HIBAG requires genotyped data in PLINK format as input. We lifted over the GRCh38  
163 variant calls from aggV2 and aggCOVID\_v4.2 for the extended (xMHC) region to hg19, keeping  
164 the variants included in the pre-trained classifiers for the seven HLA loci which were present in both  
165 the aggV2 and aggCOVID\_v4.2 call-sets to ensure that the variants used for the imputation were  
166 the same across the two datasets. We applied a threshold of  $T=0.5$  on the posterior probabilities  
167 returned by HIBAG, as in the original publication.

## 168 **HLA inference using HLA\*LA and concordance between HIBAG and** 169 **HLA\*LA callsets**

170 We used a second HLA inference method, HLA\*LA<sup>9</sup>, to assess concordance and ensure call rates  
171 were comparable between the two methods. HLA\*LA (version fe00f82) was used with GRCh38  
172 IMGT population reference graphs to infer classical HLA types at G-group resolution for the three  
173 class I genes (HLA-A, HLA-C, HLA-B) and four class II genes (HLA-DRB1, HLA-DQA1, HLA-  
174 DQB1, HLA-DPB1) that were also imputed with HIBAG. HLA\*LA implements a graph alignment  
175 model for HLA type inference, based on the projection of linear alignments onto a variation graph.  
176 Whole-genome sequencing BAM/CRAM files including unmapped reads were used as input. Where  
177 CRAM files were used (alignments from aggCOVID\_v4.2 cohort), the reference genome FASTA file  
178 used for the original alignment was also provided.

179 Note that at time of writing, only 82% of aggV2 and aggCOVID\_v4.2 samples had their HLA  
180 types inferred by HLA\*LA (Supplementary File HLA suppinfo.xlsx (Sheet B)). All samples had their  
181 HLA types imputed using HIBAG.

182 For samples for which we had both HIBAG and HLA\*LA calls (n=45,796), we compared the 4-digit  
183 resolution alleles called from HIBAG with the alleles called from HLA\*LA. As HLA\*LA calls alleles  
184 at G-group resolution, we took all 4-digit alleles belonging to each G-Group and compared these to  
185 the HIBAG calls. For example, if a sample is called as A\*01:01:01G, the mapped HLA alleles at  
186 4-digit resolution within HLA\*LA are 01:01, 01:04, 01:10, 01:13, 01:14, 01:15, 01:22, 01:32, 01:37,  
187 01:45, 01:56, 01:81, 01:87. These were compared against the HIBAG 4-digit calls. If the 4-digits  
188 matched exactly (in either diploid combination - i.e. 01:01 / 01:04 vs 01:04 / 01:01), then sample  
189 alleles were deemed concordant. We found that >96% of calls were identical between HIBAG and  
190 HLA\*LA.

191 The percentage of concordant calls between HIBAG and HLA\*LA by ancestry and locus is shown in  
192 Supplementary File HLA suppinfo.xlsx (Sheet C).

## 193 **HLA Association Tests**

194 HLA calls from HIBAG were aggregated into a single multi-sample VCF file containing sample  
195 genotypes for all observed HLA calls. Per sample, the genotypes of any allele call with posterior  
196 probability < 0.5 were set to missing. If a sample then had a missing genotype for a particular  
197 allele, all other alleles at that locus were also set to missing. For each locus, samples that did not  
198 harbour a specific HLA allele (either in a heterozygous or homozygous alternate state), were set to  
199 homozygous reference; unless already set to missing from the above mask.

200 HLA association analysis (single variant association tests) was run under an additive model using  
201 SAIGE (logistic mixed-model regression) version 0.44.5; in an identical fashion to the SNV GWAS.

202 The multi-sample VCF of aggregated HLA type calls from HIBAG were used as input. The set  
203 of 60K high-quality common SNPs `aggCOVID_v4.2_aggV2_HQSNPs` were used to create the  
204 GRM and variance ratio files. HLA association tests were run per ancestry (EUR, SAS, EAS, AFR)  
205 on unrelated individuals for the `sev_vs_mld_aggV2` cohort. Each HLA association test was run  
206 using: *sex*, *age*, *age*<sup>2</sup>, *age* × *sex*, and the first 20 ancestral principle components as covariates. No  
207 minimum minor allele count / frequency threshold was set. Results can be seen in Supplementary  
208 File `HLAsuppinfo.xlsx` (Sheet D). Note this table combines the results for all ancestries (EUR, SAS,  
209 EAS, and AFR) - which is referenced in the first column of the table. The table is sorted by ancestry  
210 and alphabetically by allele.

211 HLA-DRB1\*:04:01 was the only genome-wide significant HLA allele ( $OR = 0.80$ ,  $95\%CI = 0.75 -$   
212  $0.86$ ,  $P = 1.6 \times 10^{-10}$ , in EUR), having a protective effect (casesMAF: 9.6%, controlsMAF: 11.7%).  
213 In Europeans, the DRB1\*04:01 allele had a low rate of missingness (call rate >0.92 at T=0.5  
214 posterior probability threshold), and was in Hardy-Weinberg equilibrium for both cases ( $p=0.32$ )  
215 and controls ( $p=0.17$ ). The observed allele frequency for HLA-DRB1\*04:01 was 0.1%, 0.08%, and  
216 0.02% for AFR, EAS, and SAS cohorts respectively. A meta-analysis was performed using METAL  
217 with an inverse-variance weighted method across the four populations. DRB1\*04:01 remained the  
218 only significant association ( $OR = 0.80$ ,  $95\%CI = 0.75 - 0.86$ ,  $P = 1.4 \times 10^{-10}$ ), Supplementary File  
219 `HLAsuppinfo.xlsx` (Sheet E).

## 220 Conditional Analysis

221 We conducted a conditional analysis, controlling for the HLA-DRB1\*04:01 allele, on the main  
222 GWAS results within the extended MHC region. This analysis was performed on the European  
223 `sev_vs_mld_aggV2` cohort. To do this, we firstly regressed out the effect of DRB1\*04:01 (including  
224 *age*, *sex*, *age* × *sex*, *age*<sup>2</sup>, and the first 20 population PCs), and performed linear regression on  
225 the residuals using the GWAS variant genotypes as the dependent variable. No variants within  
226 the extended MHC remained genome-wide significant upon conditioning on DRB1\*04:01. The top  
227 GWAS signal (chr6:32623820 T/C;  $OR = 0.88$ ,  $95\%CI = 0.84 - 0.92$ ,  $P = 3.3 \times 10^{-9}$ ) was attenuated  
228 following conditional analysis ( $P = 0.001$ ). Figure 25 shows the results of the combined HLA and  
229 GWAS association results and the conditional analysis.

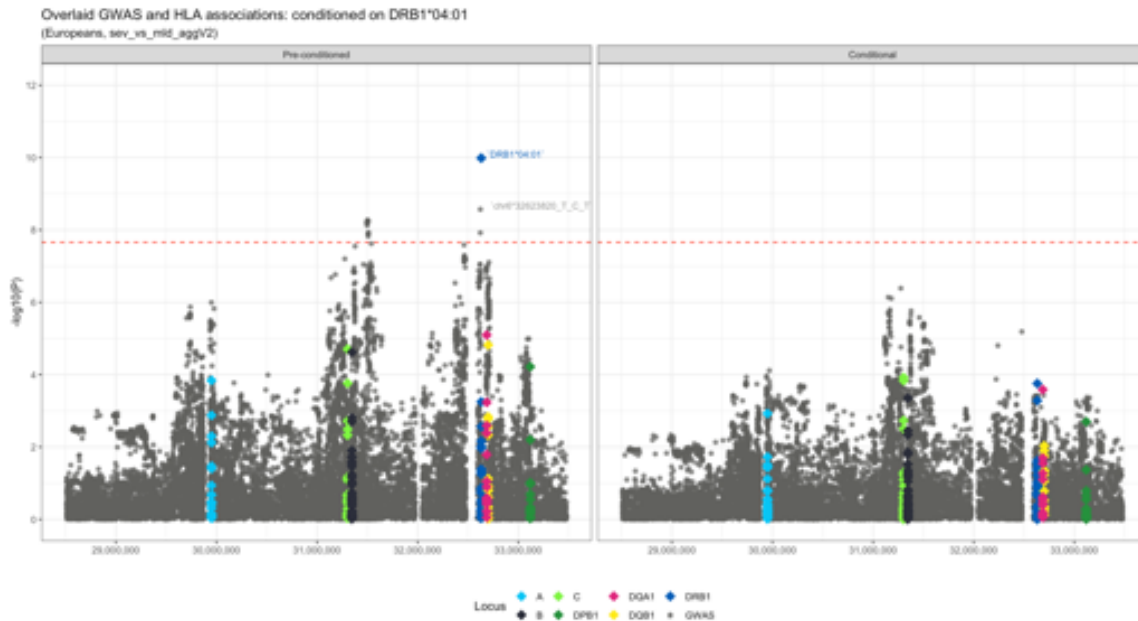

Figure 25: Manhattan plot of HLA and GWAS signal across the extended MHC region for the European sev\_vs\_mld\_aggV2 cohort. Grey circles mark the GWAS (small variant) associations and diamonds represent the HLA each allele association, coloured by locus. The lead variant from the GWAS and lead allele from HLA are labelled. The left-panel shows the raw association  $-\log_{10}(p\text{-values})$  per variant - prior to conditional analysis. The right-panel shows the  $-\log_{10}(p\text{-values})$  per variant following conditioning on DRB1\*04:01. The dashed red line is the genome-wide significance threshold for Europeans.



230 **Meta-analysis by information content (MAIC)**

231 In order to put the results in the context of existing knowledge of host genes implicated in SARS-  
 232 CoV-2 replication or pathophysiology of COVID-19, we use meta-analysis by information content  
 233 (MAIC)<sup>10</sup> to incorporate lists of named genes from a large systematic review of in vitro and in vivo  
 234 studies.<sup>11</sup> Remarkably, the top 2000 named genes in our metaTAS contributes 19.5% of the total  
 235 information content in this composite analysis (Supplementary Figure 26). Full results are available  
 236 at [baillielab.net/maic/covid](http://baillielab.net/maic/covid).

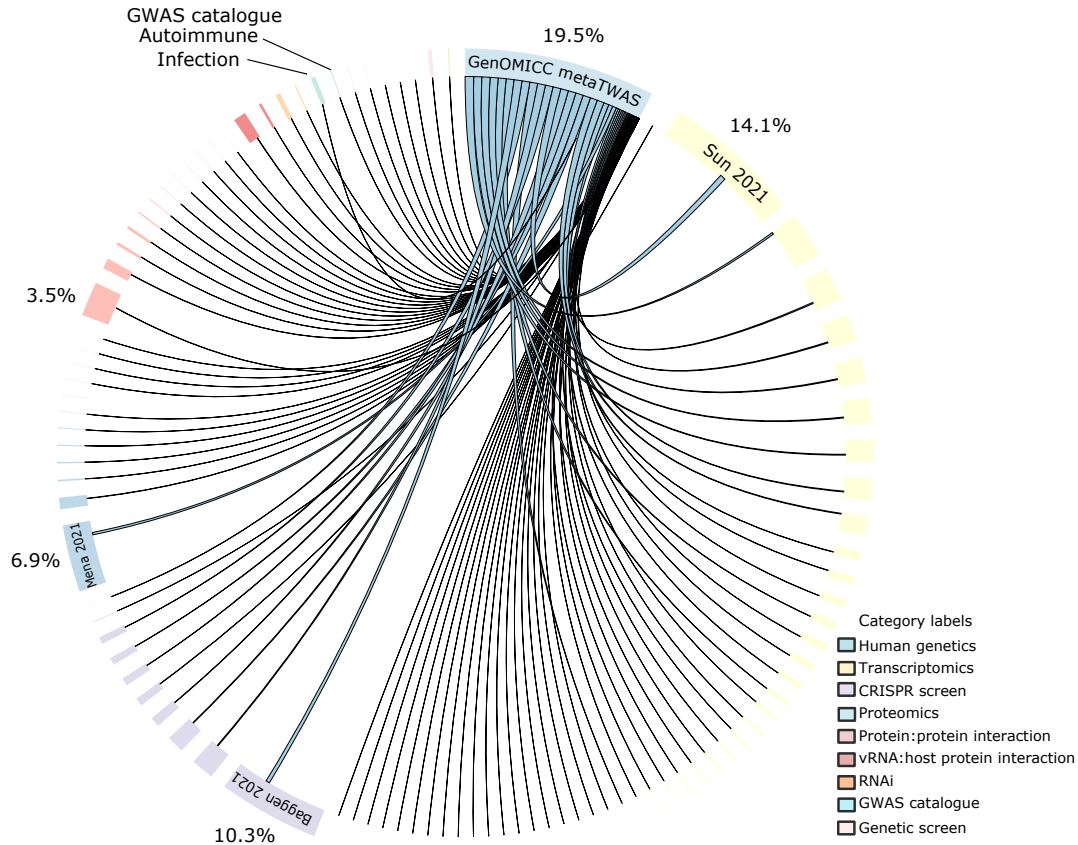

Figure 26: Circular diagram of shared information content among data sources using MAIC analysis. Each data source is represented by a coloured block on the outer ring of the circle; the size of data source blocks is proportional to the summed information content of the input list—that is, the total contribution that this data source makes to the aggregate, calculated as the sum of the MAIC gene scores contributed by that list and represented numerically for datasets with the highest information content. Lines are coloured according to the dominant data source. Data sources within the same category share the same colour (legend). The largest categories and data sources are labelled. An interactive version of this figure is available at [baillielab.net/maic/covid](http://baillielab.net/maic/covid).

## References

- [1] Consortium, T. G. The GTEx Consortium atlas of genetic regulatory effects across human tissues. *Science* **369**, 1318–1330 (2020). URL <https://science.sciencemag.org/content/369/6509/1318>. Publisher: American Association for the Advancement of Science \_eprint: <https://science.sciencemag.org/content/369/6509/1318.full.pdf>.
- [2] Ellinghaus, D. *et al.* Genomewide association study of severe covid-19 with respiratory failure. *The New England journal of medicine* **383**, 1522–1534 (2020).
- [3] The COVID-19 Host Genetics Initiative & Ganna, A. Mapping the human genetic architecture of COVID-19 by worldwide meta-analysis. *medRxiv* 2021.03.10.21252820 (2021).
- [4] Degenhardt, F. *et al.* New susceptibility loci for severe COVID-19 by detailed GWAS analysis in European populations (2021).
- [5] Pairo-Castineira, E. *et al.* Genetic mechanisms of critical illness in Covid-19. *Nature* 1–1 (2020).
- [6] Zhou, W. *et al.* Scalable generalized linear mixed model for region-based association tests in large biobanks and cohorts. *Nature Genetics* **52**, 634–639 (2020). URL <https://www.nature.com/articles/s41588-020-0621-6>.
- [7] Zhang, Q. *et al.* Inborn errors of type I IFN immunity in patients with life-threatening COVID-19. *Science (New York, N.y.)* **370**, eabd4570 (2020). URL <https://www.ncbi.nlm.nih.gov/pmc/articles/PMC7857407/>.
- [8] Zheng, X. *et al.* HIBAG - HLA genotype imputation with attribute bagging. *Pharmacogenomics Journal* **14**, 192–200 (2014).
- [9] Diltthey, A. T. *et al.* HLA\*LA—HLA typing from linearly projected graph alignments. *Bioinformatics* **35**, 4394–4396 (2019). URL <https://doi.org/10.1093/bioinformatics/btz235>. <https://academic.oup.com/bioinformatics/article-pdf/35/21/4394/30330845/btz235.pdf>.
- [10] Li, B. *et al.* Genome-wide CRISPR screen identifies host dependency factors for influenza A virus infection. *Nature Communications* **11**, 164 (2020).
- [11] Parkinson, N. *et al.* Dynamic data-driven meta-analysis for prioritisation of host genes implicated in COVID-19. *Scientific Reports* **10**, 22303 (2020).

## GenOMICC Investigators

**GenOMICC Co-Investigator** J. Kenneth Baillie<sup>1,2</sup>, Colin Begg<sup>3</sup>, Sara Clohisey<sup>1</sup>, Charles Hinds<sup>4</sup>, Peter Horby<sup>5</sup>, Julian Knight<sup>6</sup>, David Maslove<sup>7</sup>, Danny McAuley<sup>8,9</sup>, Johnny Millar<sup>1</sup>, Hugh Montgomery<sup>10</sup>, Alistair Nichol<sup>11</sup>, Peter J.M. Openshaw<sup>12,13</sup>, Chris P Ponting<sup>14</sup>, Kathy Rowan<sup>15</sup>, Malcolm G Semple<sup>16,17</sup>, Manu Shankar-Hari<sup>18</sup>, Charlotte Summers<sup>19</sup>, Timothy Walsh<sup>2</sup>.

269 **Management and Laboratory team** Ruth Armstrong<sup>1</sup>, J. Kenneth Baillie<sup>1,2</sup>, Heather Biggs<sup>20</sup>,  
270 Ceilia Boz<sup>1</sup>, Adam Brown<sup>1</sup>, Richard Clark<sup>21</sup>, Sara Clohisey<sup>1</sup>, Audrey Coutts<sup>21</sup>, Judy Coyle<sup>1</sup>, Louise  
271 Cullum<sup>1</sup>, Nicky Day<sup>1</sup>, Lorna Donnelly<sup>21</sup>, Esther Duncan<sup>1</sup>, Angie Fawkes<sup>21</sup>, Paul Finernan<sup>1</sup>, Max  
272 Head Fourman<sup>1</sup>, Anita Furlong<sup>20</sup>, James Furniss<sup>1</sup>, Bernadette Gallagher<sup>1</sup>, Tammy Gilchrist<sup>21</sup>,  
273 Ailsa Golightly<sup>1</sup>, Fiona Griffiths<sup>1</sup>, Katarzyna Hafezi<sup>21</sup>, Debbie Hamilton<sup>1</sup>, Ross Hendry<sup>1</sup>, Andy  
274 Law<sup>1</sup>, Dawn Law<sup>1</sup>, Rachel Law<sup>1</sup>, Sarah Law<sup>1</sup>, Rebecca Lidstone-Scott<sup>1</sup>, Louise Macgillivray<sup>21</sup>, Alan  
275 Maclean<sup>21</sup>, Hanning Mal<sup>1</sup>, Sarah McCafferty<sup>21</sup>, Ellie McMaster<sup>1</sup>, Jen Meikle<sup>1</sup>, Shona C Moore<sup>16</sup>,  
276 Kirstie Morrice<sup>21</sup>, Lee Murphy<sup>21</sup>, Wilna Oosthuizen<sup>1</sup>, Nick Parkinson<sup>1</sup>, Trevor Paterson<sup>1</sup>, Katherine  
277 Schon<sup>20</sup>, Andrew Stenhouse<sup>1</sup>, Maaike Swets<sup>1,22</sup>, Helen Szoor-McElhinney<sup>1</sup>, Filip Taneski<sup>1</sup>, Lance  
278 Turtle<sup>16</sup>, Tony Wackett<sup>1</sup>, Mairi Ward<sup>1</sup>, Jane Weaver<sup>1</sup>, Nicola Wrobel<sup>21</sup>, Marie Zechner<sup>1</sup>, Mybaya  
279 Hellen<sup>1</sup>.

280 **Guys and St Thomas' Hospital, London, UK** Gill Arbane<sup>23</sup>, Aneta Bociek<sup>23</sup>, Sara  
281 Campos<sup>‡,23</sup>, Neus Grau<sup>23</sup>, Tim Owen Jones<sup>23</sup>, Rosario Lim<sup>23</sup>, Martina Marotti<sup>23</sup>, Marlies  
282 Ostermann<sup>\*,23</sup>, Manu Shankar-Hari<sup>\*,23</sup>, Christopher Whitton<sup>23</sup>.

283 **Barts Health NHS Trust, London, UK** Zoe Alldis<sup>24</sup>, Raine Astin-Chamberlain<sup>24</sup>, Fatima  
284 Bibi<sup>24</sup>, Jack Biddle<sup>24</sup>, Sarah Blow<sup>24</sup>, Matthew Bolton<sup>24</sup>, Catherine Borra<sup>24</sup>, Ruth Bowles<sup>24</sup>, Mau-  
285 drian Burton<sup>24</sup>, Yasmin Choudhury<sup>24</sup>, David Collier<sup>\*,24</sup>, Amber Cox<sup>24</sup>, Amy Easthope<sup>24</sup>, Patrizia  
286 Ebano<sup>24</sup>, Stavros Fotiadis<sup>24</sup>, Jana Gurasashvili<sup>24</sup>, Rosslyn Halls<sup>24</sup>, Pippa Hartridge<sup>24</sup>, Delordson  
287 Kallon<sup>24</sup>, Jamila Kassam<sup>24</sup>, Ivone Lancoma-Malcolm<sup>24</sup>, Maninderpal Matharu<sup>24</sup>, Peter May<sup>24</sup>, Oliver  
288 Mitchelmore<sup>24</sup>, Tabitha Newman<sup>24</sup>, Mital Patel<sup>24</sup>, Jane Pheby<sup>24</sup>, Irene Pinzuti<sup>24</sup>, Zoe Prime<sup>24</sup>,  
289 Oleksandra Prsyazhna<sup>24</sup>, Julian Shiel<sup>24</sup>, Melanie Taylor<sup>24</sup>, Carey Tierney<sup>24</sup>, Suzanne Wood<sup>‡,24</sup>,  
290 Anne Zak<sup>‡,24</sup>, Olivier Zongo<sup>24</sup>.

291 **James Cook University Hospital, Middlesbrough, UK** Stephen Bonner<sup>\*,25</sup>, Keith Hugill<sup>25</sup>,  
292 Jessica Jones<sup>25</sup>, Steven Liggett<sup>25</sup>, Evie Headlam<sup>25</sup>.

293 **Royal Stoke University Hospital, Staffordshire, UK** Nageswar Bandla<sup>\*,26</sup>, Minnie  
294 Gellamucho<sup>‡,26</sup>, Michelle Davies<sup>26</sup>, Christopher Thompson<sup>26</sup>.

295 **North Middlesex University Hospital NHS trust, London, UK** Marwa Abdelrazik<sup>27</sup>,  
296 Dhanalakshmi Bakthavatsalam<sup>‡,27</sup>, Munzir Elhassan<sup>27</sup>, Arunkumar Ganesan<sup>27</sup>, Anne Haldeos<sup>\*,27</sup>,  
297 Jeronimo Moreno-Cuesta<sup>\*,27</sup>, Dharam Purohit<sup>27</sup>, Rachel Vincent<sup>‡,27</sup>, Kugan Xavier<sup>27</sup>, kumar Rohit<sup>28</sup>,  
298 Frater Alasdair<sup>27</sup>, Malik Saleem<sup>27</sup>, Carter David<sup>27</sup>, Jenkins Samuel<sup>27</sup>, Zoe Lamond<sup>27</sup>, Wall Alanna<sup>27</sup>.

299 **The Royal Liverpool University Hospital, Liverpool, UK** Jaime Fernandez-Roman<sup>29</sup>,  
300 David O. Hamilton<sup>29</sup>, Emily Johnson<sup>29</sup>, Brian Johnston<sup>29</sup>, Maria Lopez Martinez<sup>29</sup>, Suleman  
301 Mulla<sup>29</sup>, David Shaw<sup>29</sup>, Alicia A.C. Waite<sup>29</sup>, Victoria Waugh<sup>‡,29</sup>, Ingeborg D. Welters<sup>\*,29</sup>, Karen  
302 Williams<sup>29</sup>.

303 **King's College Hospital, London, UK** Anna Cavazza<sup>30</sup>, Maeve Cockrell<sup>30</sup>, Eleanor Corcoran<sup>30</sup>,  
304 Maria Depante<sup>30</sup>, Clare Finney<sup>30</sup>, Ellen Jerome<sup>30</sup>, Mark McPhail<sup>\*,30</sup>, Monalisa Nayak<sup>30</sup>, Harriet  
305 Noble<sup>30</sup>, Kevin O'Reilly<sup>30</sup>, Evita Pappa<sup>30</sup>, Rohit Saha<sup>30</sup>, Sian Saha<sup>30</sup>, John Smith<sup>30</sup>, Abigail  
306 Knighton<sup>30</sup>.

307 **Charing Cross Hospital, St Mary's Hospital and Hammersmith Hospital, London, UK**  
308 David Antcliffe<sup>\*,31</sup>, Dorota Banach<sup>31</sup>, Stephen Brett<sup>31</sup>, Phoebe Coghlan<sup>31</sup>, Ziortza Fernandez<sup>31</sup>,  
309 Anthony Gordon<sup>\*,31</sup>, Roceld Rojo<sup>31</sup>, Sonia Sousa Arias<sup>31</sup>, Maie Templeton<sup>‡,31</sup>.

310 **Nottingham University Hospital, Nottingham, UK** Megan Meredith<sup>\*,32</sup>, Lucy Morris<sup>\*,32</sup>,  
311 Lucy Ryan<sup>32</sup>, Amy Clark<sup>32</sup>, Julia Sampson<sup>32</sup>, Cecilia Peters<sup>32</sup>, Martin Dent<sup>32</sup>, Margaret Langley<sup>32</sup>,  
312 Saima Ashraf<sup>32</sup>, Shuying Wei<sup>32</sup>, Angela Andrew<sup>32</sup>.

313 **John Radcliffe Hospital, Oxford, UK** Archana Bashyal<sup>33</sup>, Neil Davidson<sup>33</sup>, Paula Hutton<sup>‡,33</sup>,  
314 Stuart McKechnie<sup>\*,33</sup>, Jean Wilson<sup>33</sup>.

315 **Kingston Hospital, Surrey, UK** David Baptista<sup>34</sup>, Rebecca Crowe<sup>34</sup>, Rita Fernandes<sup>34</sup>, Ros-  
316 aleen Herdman-Grant<sup>‡,34</sup>, Anna Joseph<sup>\*,34</sup>, Adam Loveridge<sup>34</sup>, India McKenley<sup>34</sup>, Eriko Morino<sup>34</sup>,  
317 Andres Naranjo<sup>34</sup>, Richard Simms<sup>34</sup>, Kathryn Sollesta<sup>34</sup>, Andrew Swain<sup>34</sup>, Harish Venkatesh<sup>34</sup>,  
318 Jacyntha Khera<sup>34</sup>, Jonathan Fox<sup>34</sup>.

319 **Royal Infirmary of Edinburgh, Edinburgh, UK** Gillian Andrew<sup>35</sup>, J. Kenneth Baillie<sup>\*,35</sup>,  
320 Lucy Barclay<sup>‡,35</sup>, Marie Callaghan<sup>35</sup>, Rachael Campbell<sup>35</sup>, Sarah Clark<sup>35</sup>, Dave Hope<sup>35</sup>, Lucy  
321 Marshall<sup>35</sup>, Corrienne McCulloch<sup>35</sup>, Kate Briton<sup>35</sup>, Jo Singleton<sup>35</sup>, Sophie Birch<sup>35</sup>.

322 **Queen Alexandra Hospital, Portsmouth, UK** Lutece Brimfield<sup>36</sup>, Zoe Daly<sup>36</sup>, David  
323 Pogson<sup>\*,36</sup>, Steve Rose<sup>‡,36</sup>.

324 **Morrison Hospital, Swansea, UK** Ceri Battle<sup>\*,37</sup>, Elaine Brinkworth<sup>37</sup>, Rachel Harford<sup>37</sup>,  
325 Carl Murphy<sup>37</sup>, Luke Newey<sup>\*,37</sup>, Tabitha Rees<sup>‡,37</sup>, Marie Williams<sup>37</sup>, Sophie Arnold<sup>37</sup>.

326 **Addenbrooke's Hospital, Cambridge, UK** Petra Polgarova<sup>‡,38</sup>, Katerina Stroud<sup>38</sup>, Charlotte  
327 Summers<sup>\*,38</sup>, Eoghan Meaney<sup>38</sup>, Megan Jones<sup>38</sup>, Anthony Ng<sup>38</sup>, Shruti Agrawal<sup>38</sup>, Nazima Pathan<sup>38</sup>,  
328 Deborah White<sup>38</sup>, Esther Daubney<sup>38</sup>, Kay Elston<sup>38</sup>.

329 **BHRUT (Barking Havering) - Queens Hospital and King George Hospital, Essex, UK**  
330 Lina Grauslyte<sup>39</sup>, Musarat Hussain<sup>\*,39</sup>, Mandeep Phull<sup>\*,39</sup>, Tatiana Pogreban<sup>‡,39</sup>, Lace Rosaroso<sup>‡,39</sup>,  
331 Erika Salciute<sup>39</sup>, George Franke<sup>39</sup>, Joanna Wong<sup>39</sup>, Aparna George<sup>39</sup>.

332 **Royal Sussex County Hospital, Brighton, UK** Laura Ortiz-Ruiz de Gordo<sup>40</sup>, Emily  
333 Peasgood<sup>40</sup>, Claire Phillips<sup>\*,40</sup>, Laura Ortiz-Ruiz de Gordo<sup>40</sup>, Emily Peasgood<sup>40</sup>, Claire  
334 Phillips<sup>\*,40</sup>.

335 **Queen Elizabeth Hospital, Birmingham, UK** Michelle Bates<sup>41</sup>, Jo Dasgin<sup>41</sup>, Jaspret Gill<sup>41</sup>,  
336 Annette Nilsson<sup>41</sup>, James Scriven<sup>\*,41</sup>.

337 **St George's Hospital, London, UK** Carlos Castro Delgado<sup>42</sup>, Deborah Dawson<sup>42</sup>, Lijun Ding<sup>42</sup>,  
338 Georgia Durrant<sup>42</sup>, Obiageri Ezeobu<sup>42</sup>, Sarah Farnell-Ward<sup>\*,42</sup>, Abiola Harrison<sup>42</sup>, Rebecca Kanu<sup>42</sup>,  
339 Susannah Leaver<sup>\*,42</sup>, elena Maccacari<sup>‡,42</sup>, Soumendu Manna<sup>\*,42</sup>, Romina Pepermans Saluzzio<sup>42</sup>,  
340 Joana Queiroz<sup>‡,42</sup>, Tinashe Samakomva<sup>42</sup>, Christine Sicat<sup>42</sup>, Joana Texeira<sup>42</sup>, Edna Fernandes Da  
341 Gloria<sup>42</sup>, Ana Lisboa<sup>42</sup>, John Rawlins<sup>42</sup>, Jisha Mathew<sup>42</sup>, Ashley Kinch<sup>42</sup>, William James Hurt<sup>42</sup>,  
342 Nirav Shah<sup>42</sup>, Victoria Clark<sup>42</sup>, Maria Thanasi<sup>42</sup>, Nikki Yun<sup>42</sup>, Kamal Patel<sup>42</sup>.

343 **Stepping Hill Hospital, Stockport, UK** Sara Bennett<sup>43</sup>, Emma Goodwin<sup>43</sup>, Matthew  
344 Jackson<sup>\*,43</sup>, Alissa Kent<sup>43</sup>, Clare Tibke<sup>‡,43</sup>, Wiesia Woodyatt<sup>43</sup>, Ahmed Zaki<sup>\*,43</sup>.

345 **Countess of Chester Hospital, Chester, UK** Azmerelda Abraheem<sup>44</sup>, Peter Bamford<sup>\*,44</sup>,  
346 Kathryn Cawley<sup>‡,44</sup>, Charlie Dunmore<sup>44</sup>, Maria Faulkner<sup>‡,44</sup>, Rumanah Girach<sup>44</sup>, Helen Jeffrey<sup>‡,44</sup>,  
347 Rhianna Jones<sup>44</sup>, Emily London<sup>44</sup>, Imrun Nagra<sup>44</sup>, Farah Nasir<sup>44</sup>, Hannah Sainsbury<sup>44</sup>, Clare  
348 Smedley<sup>44</sup>.

349 **Royal Blackburn Teaching Hospital, Blackburn, UK** Tahera Patel<sup>45</sup>, Matthew Smith<sup>45</sup>,  
350 Srikanth Chukkambotla<sup>45</sup>, Aayesha Kazi<sup>45</sup>, Janice Hartley<sup>45</sup>, Joseph Dykes<sup>45</sup>, Muhammad Hijazi<sup>45</sup>,  
351 Sarah Keith<sup>45</sup>, Meherunnisa Khan<sup>45</sup>, Janet Ryan-Smith<sup>45</sup>, Philippa Springle<sup>45</sup>, Jacqueline Thomas<sup>45</sup>,  
352 Nick Truman<sup>45</sup>, Samuel Saad<sup>45</sup>, Dabheoc Coleman<sup>45</sup>, Christopher Fine<sup>45</sup>, Roseanna Matt<sup>45</sup>, Bethan  
353 Gay<sup>45</sup>, Jack Dalziel<sup>45</sup>, Syamlan Ali<sup>45</sup>, Drew Goodchild<sup>45</sup>, Rhiannan Harling<sup>45</sup>, Ravi Bhatteejee<sup>45</sup>,  
354 Wendy Goddard<sup>45</sup>, Chloe Davison<sup>45</sup>, Stephen Duberly<sup>45</sup>, Jeanette Hargreaves<sup>45</sup>, Rachel Bolton<sup>45</sup>.

355 **The Tunbridge Wells Hospital and Maidstone Hospital, Kent, UK** Miriam Davey<sup>\*,46</sup>,  
356 David Golden<sup>\*,46</sup>, Rebecca Seaman<sup>46</sup>.

357 **Royal Gwent Hospital, Newport, UK** Shiney Cherian<sup>‡,47</sup>, Sean Cutler<sup>47</sup>, Anne Emma  
358 Heron<sup>‡,47</sup>, Anna Roynon-Reed<sup>47</sup>, Tamas Szakmany<sup>\*,47</sup>, Gemma Williams<sup>47</sup>, Owen Richards<sup>47</sup>,  
359 Yusuf Cheema<sup>47</sup>.

360 **Pinderfields General Hospital, Wakefield, UK** Hollie Brooke<sup>48</sup>, Sarah Buckley<sup>‡,48</sup>, Jose  
361 Cebrian Suarez<sup>48</sup>, Ruth Charlesworth<sup>48</sup>, Karen Hansson<sup>48</sup>, John Norris<sup>48</sup>, Alice Poole<sup>48</sup>, Alas-  
362 tair Rose<sup>\*,48</sup>, Rajdeep Sandhu<sup>48</sup>, Brendan Sloan<sup>\*,48</sup>, Elizabeth Smithson<sup>48</sup>, Muthu Thirumaran<sup>48</sup>,  
363 Veronica Wagstaff<sup>48</sup>, Alexandra Metcalfe<sup>48</sup>.

364 **Royal Berkshire NHS Foundation Trust, Berkshire, UK** Mark Brunton<sup>49</sup>, Jess Caterson<sup>49</sup>,  
365 Holly Coles<sup>49</sup>, Matthew Frise<sup>\*,49</sup>, Sabi Gurung Rai<sup>49</sup>, Nicola Jacques<sup>‡,49</sup>, Liza Keating<sup>49</sup>, Emma  
366 Tilney<sup>49</sup>, Shauna Bartley<sup>49</sup>, Parminder Bhuie<sup>49</sup>.

367 **Broomfield Hospital, Chelmsford, UK** Sian Gibson<sup>50</sup>, Amanda Lyle<sup>50</sup>, Fiona McNeela<sup>50</sup>,  
368 Jayachandran Radhakrishnan<sup>\*,50</sup>, Alistair Hughes<sup>\*,50</sup>.

369 **Northumbria Healthcare NHS Foundation Trust, North Shields, UK** Bryan Yates<sup>\*,51</sup>,  
370 Jessica Reynolds<sup>‡,51</sup>, Helen Campbell<sup>51</sup>, Maria Thompson<sup>51</sup>, Steve Dodds<sup>51</sup>, Stacey Duffy<sup>51</sup>.

371 **Whiston Hospital, Prescot, UK** Sandra Greer<sup>‡,52</sup>, Karen Shuker<sup>‡,52</sup>, Ascanio Tridente<sup>\*,52</sup>.

372 **Croydon University Hospital, Croydon, UK** Reena Khade<sup>‡,53</sup>, Ashok Sundar<sup>\*,53</sup>, George  
373 Tsinaslanidis<sup>53</sup>.

374 **York Hospital, York, UK** Isobel Birkinshaw<sup>‡,54</sup>, Joseph Carter<sup>\*,54</sup>, Kate Howard<sup>54</sup>, Joanne  
375 Ingham<sup>54</sup>, Rosie Joy<sup>54</sup>, Harriet Pearson<sup>54</sup>, Samantha Roche<sup>54</sup>, Zoe Scott<sup>54</sup>.

376 **Heartlands Hospital, Birmingham, UK** Hollie Bancroft<sup>55</sup>, Mary Bellamy<sup>55</sup>, Margaret  
377 Carmody<sup>55</sup>, Jacqueline Daghish<sup>55</sup>, Faye Moore<sup>55</sup>, Joanne Rhodes<sup>55</sup>, Mirriam Sangombe<sup>55</sup>, Salma  
378 Kadiri<sup>55</sup>, James Scriven<sup>\*,55</sup>.

379 **Ashford and St Peter's Hospital, Surrey, UK** Maria Croft<sup>‡,56</sup>, Ian White<sup>\*,56</sup>, Victoria  
380 Frost<sup>56</sup>, Maia Aquino<sup>56</sup>.

381 **Barnet Hospital, London, UK** Rajeev Jha<sup>\*,57</sup>, Vinodh Krishnamurthy<sup>57</sup>, Lai Lim<sup>57</sup>, Rajeev  
382 Jha<sup>\*,57</sup>, Vinodh Krishnamurthy<sup>57</sup>, Li Lim<sup>‡,57</sup>.

383 **East Surrey Hospital, Redhill, UK** Edward Combes<sup>\*,58</sup>, Teishel Joefield<sup>58</sup>, Sonja Monnery<sup>58</sup>,  
384 Valerie Beech<sup>58</sup>, Sallyanne Trotman<sup>58</sup>.

385 **Ninewells Hospital, Dundee, UK** Christine Almaden-Boyle<sup>59</sup>, Pauline Austin<sup>59</sup>, Louise  
386 Cabrelli<sup>‡,59</sup>, Stephen Cole<sup>59</sup>, Matt Casey<sup>59</sup>, Susan Chapman<sup>59</sup>, Stephen Cole<sup>\*,59</sup>, Clare Whyte<sup>59</sup>.

387 **Worthing Hospital, Worthing, UK and St Richard's Hospital, Chichester, UK** Yolanda  
388 Baird<sup>‡,60</sup>, Aaron Butler<sup>60</sup>, Indra Chadbourn<sup>60</sup>, Linda Folkes<sup>60</sup>, Heather Fox<sup>60</sup>, Amy Gardner<sup>60</sup>,  
389 Raquel Gomez<sup>‡,60</sup>, Gillian Hobden<sup>60</sup>, Luke Hodgson<sup>\*,60</sup>, Kirsten King<sup>60</sup>, Michael Margaron<sup>\*,60</sup>,  
390 Tim Martindale<sup>60</sup>, Emma Meadows<sup>60</sup>, Dana Raynard<sup>60</sup>, Yvette Thirlwall<sup>60</sup>, David Helm<sup>60</sup>, Jordi  
391 Margalef<sup>60</sup>.

392 **Southampton General Hospital, Southampton, UK** Kristine Criste<sup>61</sup>, Rebecca Cusack<sup>\*,61</sup>,  
393 Kim Golder<sup>\*,61</sup>, Hannah Golding<sup>61</sup>, Oliver Jones<sup>‡,61</sup>, Samantha Leggett<sup>61</sup>, Michelle Male<sup>61</sup>, Martyna  
394 Marani<sup>61</sup>, Kirsty Prager<sup>61</sup>, Toran Williams<sup>61</sup>, Belinda Roberts<sup>61</sup>, Karen Salmon<sup>61</sup>.

395 **The Alexandra Hospital, Redditch and Worcester Royal Hospital, Worcester, UK** Pe-  
396 ter Anderson<sup>62</sup>, Katie Archer<sup>62</sup>, Karen Austin<sup>62</sup>, caroline Davis<sup>62</sup>, Alison Durie<sup>62</sup>, Olivia Kelsall<sup>\*,62</sup>,  
397 Jessica Thrush<sup>62</sup>, Charlie Vigurs<sup>62</sup>, Laura Wild<sup>62</sup>, Hannah-Louise Wood<sup>62</sup>, Helen Tranter<sup>62</sup>, Alison  
398 Harrison<sup>62</sup>, Nicholas Cowley<sup>62</sup>, Michael McAlindon<sup>62</sup>, Andrew Burtenshaw<sup>62</sup>, Stephen Digby<sup>62</sup>,  
399 Emma Low<sup>62</sup>, Aled Morgan<sup>62</sup>, Naiara Cother<sup>62</sup>, Tobias Rankin<sup>62</sup>, Sarah Clayton<sup>62</sup>, Alex McCurdy<sup>62</sup>.

400 **Sandwell General Hospital and City Hospital, Birmingham, UK** Cecilia Ahmed<sup>63</sup>, Balvin-  
401 der Baines<sup>63</sup>, Sarah Clamp<sup>63</sup>, Julie Colley<sup>63</sup>, Risna Haq<sup>63</sup>, Anne Hayes<sup>63</sup>, Jonathan Hulme<sup>\*,63</sup>,  
402 Samia Hussain<sup>‡,63</sup>, Sibet Joseph<sup>63</sup>, Rita Kumar<sup>63</sup>, Zahira Maqsood<sup>63</sup>, Manjit Purewal<sup>63</sup>.

403 **Blackpool Victoria Hospital, Blackpool, UK** Leonie Benham<sup>‡,64</sup>, Zena Bradshaw<sup>64</sup>, Joanna  
404 Brown<sup>64</sup>, Melanie Caswell<sup>64</sup>, Jason Cupitt<sup>\*,64</sup>, Sarah Melling<sup>64</sup>, Stephen Preston<sup>64</sup>, Nicola Slawson<sup>64</sup>,  
405 Emma Stoddard<sup>‡,64</sup>, Scott Warden<sup>64</sup>.

406 **Royal Glamorgan Hospital, Pontyclun, UK** Bethan Deacon<sup>65</sup>, Ceri Lynch<sup>\*,65</sup>, Carla  
407 Potheary<sup>65</sup>, Lisa Roche<sup>‡,65</sup>, Gwenllian Sera Howe<sup>65</sup>, Jayaprakash Singh<sup>65</sup>, Keri Turner<sup>65</sup>, Hannah  
408 Ellis<sup>65</sup>, Natalie Stroud<sup>65</sup>.

409 **The Royal Oldham Hospital, Manchester, UK** Jodie Hunt<sup>66</sup>, Joy Dearden<sup>‡,66</sup>, Emma  
410 Dobson<sup>66</sup>, Andy Drummond<sup>\*,66</sup>, Michelle Mulcahy<sup>66</sup>, Sheila Munt<sup>66</sup>, Grainne O'Connor<sup>66</sup>, Jennifer  
411 Philbin<sup>66</sup>, Chloe Rishton<sup>66</sup>, Redmond Tully<sup>\*,66</sup>, Sarah Winnard<sup>66</sup>.

412 **Glasgow Royal Infirmary, Glasgow, UK** Susanne Cathcart<sup>‡,67</sup>, Katharine Duffy<sup>67</sup>, Alex  
413 Puxty<sup>\*,67</sup>, Kathryn Puxty<sup>67</sup>, Lynne Turner<sup>67</sup>, Jane Ireland<sup>67</sup>, Gary Semple<sup>67</sup>.

414 **St James's University Hospital and Leeds General Infirmary, Leeds, UK** Kate Long<sup>68</sup>,  
415 Simon Whiteley<sup>\*,68</sup>, Elizabeth Wilby<sup>‡,68</sup>, Bethan Ogg<sup>68</sup>.

416 **University Hospital North Durham, Darlington, UK and Darlington Memorial Hos-  
417 pital, Darlington, UK** Amanda Cowton<sup>\*,69</sup>, Andrea Kay<sup>69</sup>, Melanie Kent<sup>69</sup>, Kathryn Potts<sup>69</sup>,  
418 Ami Wilkinson<sup>69</sup>, Suzanne Campbell<sup>\*,69</sup>, Ellen Brown<sup>‡,69</sup>.

419 **Fairfield General Hospital, Bury, UK** Julie Melville<sup>70</sup>, Jay Naisbitt<sup>\*,70</sup>, Rosane Joseph<sup>70</sup>,  
420 Maria Lazo<sup>70</sup>, Olivia Walton<sup>70</sup>, Alan Neal<sup>70</sup>.

421 **Wythenshawe Hospital, Manchester, UK** Peter Alexander<sup>\*,71</sup>, Schvearn Allen<sup>71</sup>, Joanne  
422 Bradley-Potts<sup>‡,71</sup>, Craig Brantwood<sup>\*,71</sup>, Jasmine Egan<sup>71</sup>, Timothy Felton<sup>71</sup>, Grace Padden<sup>71</sup>, Luke  
423 Ward<sup>71</sup>, Stuart Moss<sup>71</sup>, Susannah Glasgow<sup>71</sup>.

424 **Royal Alexandra Hospital, Paisley, UK** Lynn Abel<sup>‡,72</sup>, Michael Brett<sup>72</sup>, Brian Digby<sup>72</sup>, Lisa  
425 Gemmell<sup>72</sup>, James Hornsby<sup>72</sup>, Patrick MacGoey<sup>72</sup>, Pauline O'Neil<sup>72</sup>, Richard Price<sup>72</sup>, Natalie  
426 Rodden<sup>‡,72</sup>, Kevin Rooney<sup>\*,72</sup>, Radha Sundaram<sup>72</sup>, Nicola Thomson<sup>‡,72</sup>.

427 **Good Hope Hospital, Birmingham, UK** Bridget Hopkins<sup>73</sup>, James Scriven<sup>\*,73</sup>, Laura  
428 Thrasyvoulou<sup>73</sup>, Heather Willis<sup>73</sup>.

429 **Tameside General Hospital, Ashton Under Lyne, UK** Martyn Clark<sup>74</sup>, Martina Coulding<sup>74</sup>,  
430 Edward Jude<sup>\*,74</sup>, Jacqueline McCormick<sup>74</sup>, Oliver Mercer<sup>74</sup>, Darsh Potla<sup>74</sup>, Hafiz Rehman<sup>74</sup>, Heather  
431 Savill<sup>74</sup>, Victoria Turner<sup>‡,74</sup>.

432 **Royal Derby Hospital, Derby, UK** Charlotte Downes<sup>75</sup>, Kathleen Holding<sup>\*,75</sup>, Katie Riches<sup>‡,75</sup>,  
433 Mary Hilton<sup>75</sup>, Mel Hayman<sup>75</sup>, Deepak Subramanian<sup>\*,75</sup>, Priya Daniel<sup>\*,75</sup>.

434 **Medway Maritime Hospital, Gillingham, UK** Oluronke Adanini<sup>76</sup>, Nikhil Bhatia<sup>\*,76</sup>, Maines  
435 Msiska<sup>‡,76</sup>.

436 **Royal Victoria Infirmary, Newcastle Upon Tyne, UK** Ian Clement<sup>\*,77</sup>, Bijal Patel<sup>77</sup>, A  
437 Gulati<sup>77</sup>, Carole Hays<sup>‡,77</sup>, K Webster<sup>77</sup>, Anne Hudson<sup>‡,77</sup>, Andrea Webster<sup>77</sup>, Elaine Stephenson<sup>77</sup>,  
438 Louise McCormack<sup>77</sup>, Victoria Slater<sup>77</sup>, Rachel Nixon<sup>77</sup>, Helen Hanson<sup>77</sup>, Maggie fearby<sup>77</sup>, Sinead  
439 Kelly<sup>77</sup>, Victoria Bridgett<sup>77</sup>, Philip Robinson<sup>77</sup>.

440 **Poole Hospital, Poole, UK** Julie Camsooksai<sup>‡,78</sup>, Charlotte Humphrey<sup>78</sup>, Sarah Jenkins<sup>78</sup>,  
441 Henrik Reschreiter<sup>\*,78</sup>, Beverley Wadams<sup>78</sup>, Yasmin Death<sup>78</sup>.

442 **Bedford Hospital, Bedford, UK** Victoria Bastion<sup>79</sup>, Daphene Clarke<sup>79</sup>, Beena David<sup>‡,79</sup>,  
443 Harriet Kent<sup>79</sup>, Rachel Lorusso<sup>79</sup>, Gamu Lubimbi<sup>79</sup>, Sophie Murdoch<sup>79</sup>, Melchizedek Penacerrada<sup>79</sup>,  
444 Alastair Thomas<sup>79</sup>, Jennifer Valentine<sup>79</sup>, Ana Vochin<sup>\*,79</sup>, Retno Wulandari<sup>79</sup>, Brice Djeugam<sup>79</sup>.

445 **Queens Hospital Burton, Burton-On-Trent, UK** Gillian Bell<sup>‡,80</sup>, Katy English<sup>\*,80</sup>, Amro  
446 Katary<sup>\*,80</sup>, Louise Wilcox<sup>‡,80</sup>.

447 **North Manchester General Hospital, Manchester, UK** Michelle Bruce<sup>81</sup>, Karen Connolly<sup>81</sup>,  
448 Tracy Duncan<sup>\*,81</sup>, Helen T-Michael<sup>81</sup>, Gabriella Lindergard<sup>81</sup>, Samuel Hey<sup>81</sup>, Claire Fox<sup>81</sup>, Jordan  
449 Alfonso<sup>81</sup>, Laura Jayne Durrans<sup>81</sup>, Jacinta Guerin<sup>81</sup>, Bethan Blackledge<sup>81</sup>, Jade Harris<sup>81</sup>, Martin  
450 Hruska<sup>81</sup>, Ayaa Eltayeb<sup>81</sup>, Thomas Lamb<sup>81</sup>, Tracey Hodgkiss<sup>81</sup>, Lisa Cooper<sup>81</sup>, Joanne Rothwell<sup>81</sup>.

451 **Aberdeen Royal Infirmary, Aberdeen, UK** Angela Allan<sup>82</sup>, Felicity Anderson<sup>‡,82</sup>, Callum  
452 Kaye<sup>\*,82</sup>, Jade Liew<sup>82</sup>, Jasmine Medhora<sup>82</sup>, Teresa Scott<sup>82</sup>, Erin Trumper<sup>82</sup>, Adriana Botello<sup>82</sup>.

453 **Derriford Hospital, Plymouth, UK** Liana Lankester<sup>‡,83</sup>, Nikitas Nikitas<sup>\*,83</sup>, Colin Wells<sup>83</sup>,  
454 Bethan Stowe<sup>83</sup>, Kayleigh Spencer<sup>83</sup>.

455 **Manchester Royal Infirmary, Manchester, UK** Craig Brandwood<sup>\*,84</sup>, Lara Smith<sup>84</sup>, Richard  
456 Clark<sup>84</sup>, Katie Birchall<sup>84</sup>, Laurel Kolakaluri<sup>84</sup>, Deborah Baines<sup>84</sup>, Anila Sukumaran<sup>84</sup>.

457 **Salford Royal Hospital, Manchester, UK** Elena Apetri<sup>85</sup>, Cathrine Basikolo<sup>85</sup>, Bethan  
458 Blackledge<sup>85</sup>, Laura Catlow<sup>85</sup>, Bethan Charles<sup>‡,85</sup>, Paul Dark<sup>85</sup>, Reece Doonan<sup>85</sup>, Jade Harris<sup>85</sup>, Al-  
459 lice Harvey<sup>85</sup>, Daniel Horner<sup>\*,85</sup>, Karen Knowles<sup>85</sup>, Stephanie Lee<sup>85</sup>, Diane Lomas<sup>85</sup>, Chloe Lyons<sup>85</sup>,  
460 Tracy Marsden<sup>85</sup>, Danielle McLaughlan<sup>‡,85</sup>, Liam McMorro<sup>85</sup>, Jessica Pendlebury<sup>85</sup>, Jane Perez<sup>85</sup>,  
461 Maria Poulaka<sup>85</sup>, Nicola Proudfoot<sup>85</sup>, Melanie Slaughter<sup>85</sup>, Kathryn Slevin<sup>85</sup>, Melanie Taylor<sup>85</sup>,  
462 Vicky Thomas<sup>85</sup>, Danielle Walker<sup>85</sup>, Angiy Michael<sup>85</sup>, Matthew Collis<sup>85</sup>.

463 **William Harvey Hospital, Ashford, UK** Tracey Cosier<sup>86</sup>, Gemma Millen<sup>86</sup>, Neil  
464 Richardson<sup>\*,86</sup>, Natasha Schumacher<sup>86</sup>, Heather Weston<sup>86</sup>, James Rand<sup>86</sup>.

465 **Queen Elizabeth University Hospital, Glasgow, UK** Nicola Baxter<sup>87</sup>, Steven Henderson<sup>\*,87</sup>,  
466 Sophie Kennedy-Hay<sup>‡,87</sup>, Christopher McParland<sup>87</sup>, Laura Rooney<sup>87</sup>, Malcolm Sim<sup>87</sup>, Gordan  
467 McCreath<sup>87</sup>.



468 **Bradford Royal Infirmary, Bradford, UK** Louise Akeroyd<sup>‡,88</sup>, Shereen Bano<sup>88</sup>, Matt  
469 Bromley<sup>88</sup>, Lucy Gurr<sup>88</sup>, Tom Lawton<sup>88</sup>, James Morgan<sup>\*,88</sup>, Kirsten Sellick<sup>88</sup>, Deborah Warren<sup>88</sup>,  
470 Brian Wilkinson<sup>88</sup>, Janet McGowan<sup>88</sup>, Camilla Ledgard<sup>88</sup>, Amelia Stacey<sup>88</sup>, Kate Pye<sup>88</sup>, Ruth  
471 Bellwood<sup>88</sup>, Michael Bentley<sup>88</sup>.

472 **Bristol Royal Infirmary, Bristol, UK** Jeremy Bewley<sup>\*,89</sup>, Zoe Garland<sup>89</sup>, Lisa Grimmer<sup>89</sup>,  
473 Bethany Gumbrell<sup>89</sup>, Rebekah Johnson<sup>89</sup>, Katie Sweet<sup>‡,89</sup>, Denise Webster<sup>89</sup>, Georgia Efford<sup>89</sup>.

474 **Norfolk and Norwich University hospital (NNUH), Norwich, UK** Karen Convery<sup>‡,90</sup>,  
475 Deirdre Fottrell-Gould<sup>90</sup>, Lisa Hudig<sup>90</sup>, Jocelyn Keshet-Price<sup>90</sup>, Georgina Randell<sup>\*,90</sup>, Katie  
476 Stammers<sup>90</sup>.

477 **Queen Elizabeth Hospital Gateshead, Gateshead, UK** Maria Bokhari<sup>91</sup>, Vanessa  
478 Linnett<sup>\*,91</sup>, Rachael Lucas<sup>91</sup>, Wendy McCormick<sup>91</sup>, Jenny Ritzema<sup>‡,91</sup>, Amanda Sanderson<sup>‡,91</sup>,  
479 Helen Wild<sup>91</sup>.

480 **Sunderland Royal Hospital, Sunderland, UK** Anthony Rostron<sup>\*,92</sup>, Alistair Roy<sup>\*,92</sup>, Lindsey  
481 Woods<sup>‡,92</sup>, Sarah Cornell<sup>92</sup>, Fiona Wakintosh<sup>92</sup>, Kimberley Rogerson<sup>92</sup>, Jordan Jarmain<sup>92</sup>.

482 **Aintree University Hospital, Liverpool, UK** Robert Parker<sup>\*,93</sup>, Amie Reddy<sup>93</sup>, Ian Turner-  
483 Bone<sup>‡,93</sup>, Laura Wilding<sup>93</sup>, Peter Harding<sup>93</sup>.

484 **Hull Royal Infirmary, Hull, UK** Caroline Abernathy<sup>94</sup>, Louise Foster<sup>94</sup>, Andrew Gratrix<sup>\*,94</sup>,  
485 Vicky Martinson<sup>94</sup>, Priyai Parkinson<sup>94</sup>, Elizabeth Stones<sup>94</sup>, Lluucia Carbral-Ortega<sup>95</sup>.

486 **University College Hospital, London, UK** Georgia Bercades<sup>‡,96</sup>, David Brealey<sup>\*,96</sup>, Ingrid  
487 Hass<sup>96</sup>, Niall MacCallum<sup>\*,96</sup>, Gladys Martir<sup>96</sup>, Eamon Raith<sup>\*,96</sup>, Anna Reyes<sup>96</sup>, Deborah Smyth<sup>96</sup>.

488 **Royal Devon and Exeter Hospital, Exeter, UK** Letizia Zitter<sup>\*,97</sup>, Sarah Benyon<sup>97</sup>, Suzie  
489 Marriott<sup>97</sup>, Linda Park<sup>97</sup>, Samantha Keenan<sup>97</sup>, Elizabeth Gordon<sup>97</sup>, Helen Quinn<sup>97</sup>, Kizzy Baines<sup>97</sup>.

490 **The Royal Papworth Hospital, Cambridge, UK** Lenka Cagova<sup>98</sup>, Adama Fofano<sup>98</sup>, Lu-  
491 cie Garner<sup>98</sup>, Helen Holcombe<sup>98</sup>, Sue Mephram<sup>98</sup>, Alice Michael Mitchell<sup>98</sup>, Lucy Mwaura<sup>\*,98</sup>,  
492 Krithivasan Praman<sup>98</sup>, Alain Vuylsteke<sup>\*,98</sup>, Julie Zamikula<sup>‡,98</sup>.

493 **Ipswich Hospital, Ipswich, UK** Bally Purewal<sup>\*,99</sup>.

494 **Southmead Hospital, Bristol, UK** Hayley Blakemore<sup>100</sup>, Borislava Borislavova<sup>100</sup>, Bever-  
495 ley Faulkner<sup>‡,100</sup>, Emma Gendall<sup>100</sup>, Elizabeth Goff<sup>100</sup>, Kati Hayes<sup>100</sup>, Matt Thomas<sup>\*,100</sup>, Ruth  
496 Worner<sup>100</sup>, Kerry Smith<sup>100</sup>, Deanna Stephens<sup>100</sup>.

497 **Milton Keynes University Hospital, Milton Keynes, UK** Louise Mew<sup>‡,101</sup>, Esther  
498 Mwaura<sup>‡,101</sup>, Richard Stewart<sup>\*,101</sup>, Felicity Williams<sup>101</sup>, Lynn Wren<sup>‡,101</sup>, Sara-Beth Sutherland  
499 <sup>‡,101</sup>.

500 **Royal Hampshire County Hospital, Hampshire, UK** Emily Bevan<sup>102</sup>, Jane Martin<sup>‡,102</sup>,  
501 Dawn Trodd<sup>102</sup>, Geoff Watson<sup>\*,102</sup>, Caroline Wrey Brown<sup>102</sup>.

502 **Queen Elizabeth Hospital, Woolwich, London, UK** Amy Collins<sup>‡,103</sup>, Waqas Khaliq<sup>\*,103</sup>,  
503 Estefania Treus Gude<sup>103</sup>.

504 **Great Ormond St Hospital and UCL Great Ormond St Institute of Child Health NIHR**  
505 **Biomedical Research Centre, London, UK** Olugbenga Akinkugbe<sup>104</sup>, Alasdair Bamford<sup>104</sup>,  
506 Emily Beech<sup>104</sup>, Holly Belfield<sup>104</sup>, Michael Bell<sup>104</sup>, Charlene Davies<sup>104</sup>, Gareth A. L. Jones<sup>104</sup>, Tara  
507 McHugh<sup>104</sup>, Hamza Meghari<sup>104</sup>, Lauran O'Neill<sup>‡,104</sup>, Mark J. Peters<sup>\*,104</sup>, Samiran Ray<sup>104</sup>, Ana  
508 Luisa Tomas<sup>104</sup>.

509 **Stoke Mandeville Hospital, Buckinghamshire, UK** Iona Burn<sup>105</sup>, Geraldine Hambrook<sup>‡,105</sup>,  
510 Katarina Manso<sup>105</sup>, Ruth Penn<sup>105</sup>, Pradeep Shanmugasundaram<sup>\*,105</sup>, Julie Tebbutt<sup>105</sup>, Danielle  
511 Thornton<sup>105</sup>.

512 **University Hospital of Wales, Cardiff, UK** Jade Cole<sup>\*,106</sup>, Michelle Davies<sup>106</sup>, Rhys Davies<sup>106</sup>,  
513 Donna Duffin<sup>106</sup>, Helen Hill<sup>106</sup>, Ben Player<sup>106</sup>, Emma Thomas<sup>106</sup>, Angharad Williams<sup>106</sup>.

514 **Basingstoke and North Hampshire Hospital, Basingstoke, UK** Denise Griffin<sup>107</sup>, Ny-  
515 cola Muchenje<sup>107</sup>, Mcdonald Mupudzi<sup>107</sup>, Richard Partridge<sup>\*,107</sup>, Jo-Anna Conyngham<sup>107</sup>, Rachel  
516 Thomas<sup>107</sup>, Mary Wright<sup>107</sup>, Maria Alvarez Corral<sup>107</sup>.

517 **Arrowe Park Hospital, Wirral, UK** Reni Jacob<sup>108</sup>, Cathy Jones<sup>108</sup>, Craig Denmade<sup>\*,108</sup>.

518 **Chesterfield Royal Hospital Foundation Trust, Chesterfield, UK** Sarah Beavis<sup>\*,109</sup>, Katie  
519 Dale<sup>109</sup>, Rachel Gascoyne<sup>109</sup>, Joanne Hawes<sup>109</sup>, Kelly Pritchard<sup>109</sup>, Lesley Stevenson<sup>109</sup>, Amanda  
520 Whileman<sup>‡,109</sup>.

521 **Musgrove Park Hospital, Taunton, UK** Patricia Doble<sup>‡,110</sup>, Joanne Hutter<sup>110</sup>, corinne  
522 Pawley<sup>110</sup>, Charmaine Shovelton<sup>110</sup>, Marius Vaida<sup>\*,110</sup>.

523 **Peterborough City Hospital, Peterborough, UK and Hinchingsbrooke Hospital, Hunt-**  
524 **ingdon, UK** Deborah Butcher<sup>111</sup>, Susie O'Sullivan<sup>‡,111</sup>, Nicola Butterworth-Cowin<sup>\*,111</sup>.

525 **Royal Hallamshire Hospital and Northern General Hospital, Sheffield, UK** Norfaizan  
526 Ahmad<sup>112</sup>, Joann Barker<sup>112</sup>, Kris Bauchmuller<sup>112</sup>, Sarah Bird<sup>112</sup>, Kay Cawthron<sup>112</sup>, Kate  
527 Harrington<sup>112</sup>, Yvonne Jackson<sup>112</sup>, Faith Kibutu<sup>112</sup>, Becky Lenagh<sup>112</sup>, Shamiso Masuko<sup>112</sup>, Gary  
528 H Mills<sup>\*,112</sup>, Ajay Raithatha<sup>112</sup>, Matthew Wiles<sup>112</sup>, Jayne Willson<sup>‡,112</sup>, Helen Newell<sup>112</sup>, Alison  
529 Lye<sup>112</sup>, Lorenza Nwafor<sup>112</sup>, Claire Jarman<sup>112</sup>, Sarah Rowland-Jones<sup>112</sup>, David Foote<sup>112</sup>, Joby  
530 Cole<sup>112</sup>, Roger Thompson<sup>112</sup>, James Watson<sup>112</sup>, Lisa Hesseldon<sup>112</sup>, Irene Macharia<sup>112</sup>, Luke Chetam  
531 <sup>112</sup>, Jacqui Smith<sup>112</sup>, Amber Ford<sup>112</sup>, Samantha Anderson<sup>112</sup>, Kathryn Birchall<sup>112</sup>, Kay Housley<sup>112</sup>,  
532 Sara Walker<sup>112</sup>, Leanne Milner<sup>112</sup>, Helena Hanratty<sup>112</sup>, Helen Trower<sup>112</sup>, Patrick Phillips<sup>112</sup>, Simon  
533 Oxspring<sup>112</sup>, Ben Donne<sup>112</sup>.

534 **Dumfries and Galloway Royal Infirmary, Dumfries, UK** Catherine Jardine<sup>‡,113</sup>, Dewi  
535 Williams<sup>\*,113</sup>, Alasdair Hay<sup>\*,113</sup>.

536 **Royal Bolton Hospital, Bolton, UK** Rebecca Flanagan<sup>114</sup>, Gareth Hughes<sup>\*,114</sup>, scott  
537 Latham<sup>‡,114</sup>, Emma McKenna<sup>‡,114</sup>, Jennifer Anderson<sup>‡,114</sup>, Robert Hull<sup>114</sup>, Kat Rhead<sup>114</sup>.

538 **Lister Hospital, Stevenage, UK** Carina Cruz<sup>‡,115</sup>, Natalie Pattison<sup>\*,115</sup>.

539 **Craigavon Area Hospital, County Armagh, NI** Rob Charnock<sup>\*,116</sup>, Denise McFarland<sup>116</sup>,  
540 Denise Cosgrove<sup>116</sup>.

541 **Southport and Formby District General Hospital, Ormskirk, UK** Ashar Ahmed<sup>\*,117</sup>,  
542 Anna Morris<sup>117</sup>, Srinivas Jakkula<sup>\*,117</sup>.

543 **Calderdale Royal Hospital, Halifax, UK and Huddersfield Royal Infirmary, Hudders-**  
544 **field, UK** Asifa Ali<sup>118</sup>.

545 **Calderdale Royal Hospital, Halifax, UK** Megan Brady<sup>118</sup>, Sam Dale<sup>118</sup>, Annalisa Dance<sup>118</sup>,  
546 Lisa Gledhill<sup>118</sup>, Jill Greig<sup>118</sup>, Kathryn Hanson<sup>118</sup>, Kelly Holdroyd<sup>118</sup>, Marie Home<sup>118</sup>, Diane  
547 Kelly<sup>118</sup>, Ross Kitson<sup>\*,118</sup>, Lear Matapure<sup>118</sup>, Deborah Melia<sup>118</sup>, Samantha Mellor<sup>118</sup>, Tonicha  
548 Nortcliffe<sup>118</sup>, Jez Pinnell<sup>\*,118</sup>, Matthew Robinson<sup>118</sup>, Lisa Shaw<sup>118</sup>, Ryan Shaw<sup>118</sup>, Lesley Thomis<sup>118</sup>,  
549 Alison Wilson<sup>‡,118</sup>, Tracy Wood<sup>118</sup>, Lee-Ann Bayo<sup>118</sup>, Ekta Merwaha<sup>118</sup>, Tahira Ishaq<sup>118</sup>, Sarah  
550 Hanley<sup>118</sup>.

551 **Prince Charles Hospital, Merthyr Tydfil, UK** Bethan Deacon<sup>119</sup>, Meg Hibbert<sup>119</sup>, Carla  
552 Potheary<sup>119</sup>, Dariusz Tetla<sup>\*,119</sup>, Chrisopher Woodford<sup>119</sup>, Latha Durga<sup>119</sup>, Gareth Kennard-Holden  
553 119.

554 **Royal Bournemouth Hospital, Bournemouth, UK** Debbie Branney<sup>‡,120</sup>, Jordan  
555 Frankham<sup>120</sup>, Sally Pitts<sup>‡,120</sup>, Nigel White<sup>120</sup>.

556 **Royal Preston Hospital, Preston, UK** Shondipon Laha<sup>121</sup>, Mark Verlander<sup>121</sup>, Alexandra  
557 Williams<sup>\*,121</sup>.

558 **Whittington Hospital, London, UK** Abdelhakim Altabaibeh<sup>\*,122</sup>, Ana Alvaro<sup>122</sup>, Kayleigh  
559 Gilbert<sup>122</sup>, Louise Ma<sup>122</sup>, Loreta Mostoles<sup>‡,122</sup>, Chetan Parmar<sup>\*,122</sup>, Kathryn Simpson<sup>122</sup>, Champa  
560 Jetha<sup>122</sup>, Lauren Booker<sup>122</sup>, Anezka Pratley<sup>122</sup>.

561 **Princess Royal Hospital, Telford and Royal Shrewsbury Hospital, Shrewsbury, UK**  
562 Colene Adams<sup>123</sup>, Anita Agason<sup>123</sup>, Tracie Arden<sup>123</sup>, Amy Bowes<sup>123</sup>, Pauline Boyle<sup>123</sup>, Mandy  
563 Beekes<sup>123</sup>, Heather Button<sup>123</sup>, Nigel Capps<sup>\*,123</sup>, Mandy Carnahan<sup>123</sup>, Anne Carter<sup>123</sup>, Danielle  
564 Childs<sup>123</sup>, Denise Donaldson<sup>‡,123</sup>, Kelly Hard<sup>123</sup>, Fran Hurford<sup>123</sup>, Yasmin Hussain<sup>123</sup>, Ayesha  
565 Javaid<sup>123</sup>, James Jones<sup>123</sup>, Sanal Jose<sup>123</sup>, Michael Leigh<sup>123</sup>, Terry Martin<sup>123</sup>, Helen Millward<sup>123</sup>,  
566 Nichola Motherwell<sup>123</sup>, Rachel Rikunenko<sup>123</sup>, Jo Stickley<sup>123</sup>, Julie Summers<sup>123</sup>, Louise Ting<sup>123</sup>,  
567 Helen Tivenan<sup>123</sup>, Louise Tonks<sup>123</sup>, Rebecca Wilcox<sup>123</sup>.

568 **Macclesfield District General Hospital, Macclesfield, UK** Maureen Holland<sup>124</sup>, Natalie  
569 Keenan<sup>124</sup>, Marc Lyons<sup>\*,124</sup>, Helen Wassall<sup>124</sup>, Chris Marsh<sup>124</sup>, Mervin Mahenthiran<sup>124</sup>, Emma  
570 Carter<sup>124</sup>, Thomas Kong<sup>124</sup>.

571 **Royal Surrey County Hospital, Guildford, UK** Helen Blackman<sup>‡,125</sup>, Ben Creagh-  
572 Brown<sup>\*,125</sup>, Sinead Donlon<sup>125</sup>, Natalia Michalak-Glinska<sup>125</sup>, Sheila Mtuwa<sup>125</sup>, Veronika  
573 Pristopan<sup>125</sup>, Armored Salberg<sup>‡,125</sup>, Eleanor Smith<sup>125</sup>, Sarah Stone<sup>125</sup>, Charles Piercy<sup>125</sup>, Jerik  
574 Verula<sup>125</sup>, Dorota Burda<sup>125</sup>, Rugia Montaser<sup>125</sup>, Lesley Harden<sup>125</sup>, Irving Mayangao<sup>125</sup>, Cheryl  
575 Marriott<sup>‡,125</sup>, Paul Bradley<sup>125</sup>, Celia Harris<sup>125</sup>.

576 **Hereford County Hospital, Hereford, UK** Susan Anderson<sup>‡,126</sup>, Eleanor Andrews<sup>126</sup>, Janine  
577 Birch<sup>‡,126</sup>, Emma Collins<sup>‡,126</sup>, Kate Hammerton<sup>126</sup>, Ryan O'Leary<sup>\*,126</sup>.

578 **University Hospital of North Tees, Stockton on Tees, UK** Michele Clark<sup>\*,127</sup>, Sarah  
579 Purvis<sup>\*,127</sup>.

580 **Lincoln County Hospital, Lincoln, UK** Russell Barber<sup>\*,128</sup>, Claire Hewitt<sup>128</sup>, Annette  
581 Hildrith<sup>128</sup>, Karen Jackson-Lawrence<sup>128</sup>, Sarah Shepardson<sup>128</sup>, Maryanne Wills<sup>128</sup>, Susan Butler  
582 <sup>128</sup>, Silvia Tavares<sup>‡,128</sup>, Amy Cunningham<sup>128</sup>, Julia Hindale<sup>128</sup>, Sarwat Arif<sup>128</sup>.

583 **Royal Cornwall Hospital, Truro, UK** Sarah Bean<sup>129</sup>, Karen Burt<sup>129</sup>, Michael Spivey<sup>\*,129</sup>.

584 **Royal United Hospital, Bath, UK** Carrie Demetriou<sup>130</sup>, Charlotte Eckbad<sup>130</sup>, Sarah  
585 Hierons<sup>‡,130</sup>, Lucy Howie<sup>130</sup>, Sarah Mitchard<sup>130</sup>, Lidia Ramos<sup>130</sup>, Alfredo Serrano-Ruiz<sup>\*,130</sup>, Katie  
586 White<sup>130</sup>, Fiona Kelly<sup>\*,130</sup>.

587 **Royal Brompton Hospital, London, UK** Daniele Cristiano<sup>131</sup>, Natalie Dormand<sup>131</sup>, Zohreh  
588 Farzad<sup>131</sup>, Mahitha Gummadi<sup>131</sup>, Kamal Liyanage<sup>131</sup>, Brijesh Patel<sup>\*,131</sup>, Sara Salmi<sup>131</sup>, Geraldine  
589 Sloane<sup>131</sup>, Vicky Thwaites<sup>‡,131</sup>, Mathew Varghese<sup>131</sup>, Anelise C Zborowski<sup>131</sup>.

590 **University Hospital Crosshouse, Kilmarnock, UK** John Allan<sup>132</sup>, Tim Geary<sup>132</sup>, Gordon  
591 Houston<sup>\*,132</sup>, Alistair Meikle<sup>132</sup>, Peter O'Brien<sup>132</sup>.

592 **Basildon Hospital, Basildon, UK** Miranda Forsey<sup>133</sup>, Agilan Kaliappan<sup>\*,133</sup>, Anne  
593 Nicholson<sup>133</sup>, Joanne Riches<sup>133</sup>, Mark Vertue<sup>‡,133</sup>, Miranda Forsey<sup>133</sup>, Agilan Kaliappan<sup>\*,133</sup>, Anne  
594 Nicholson<sup>133</sup>, Joanne Riches<sup>133</sup>, Mark Vertue<sup>‡,133</sup>.

595 **Glan Clwyd Hospital, Bodelwyddan, UK** Elizabeth Allan<sup>134</sup>, Kate Darlington<sup>134</sup>, Ffyon  
596 Davies<sup>134</sup>, Jack Easton<sup>134</sup>, Sumit Kumar<sup>134</sup>, Richard Lean<sup>134</sup>, Daniel Menzies<sup>\*,134</sup>, Richard  
597 Pugh<sup>\*,134</sup>, Xinyi Qiu<sup>134</sup>, Llinos Davies<sup>134</sup>, Hannah Williams<sup>134</sup>, Jeremy Scanlon<sup>134</sup>, Gwyneth  
598 Davies<sup>134</sup>, Callum Mackay<sup>134</sup>, Joanne Lewis<sup>134</sup>, Stephanie Rees<sup>134</sup>.

599 **West Middlesex Hospital, Isleworth, UK** Metod Oblak<sup>135</sup>, Monica Popescu<sup>\*,135</sup>, Mini  
600 Thankachen<sup>135</sup>.

601 **Royal Lancaster Infirmary, Lancaster, UK** Andrew Higham<sup>\*,136</sup>, Kerry Simpson<sup>‡,136</sup>, Jayne  
602 Craig<sup>136</sup>.

603 **Western General Hospital, Edinburgh, UK** Rosie Baruah<sup>\*,137</sup>, Sheila Morris<sup>‡,137</sup>, Susie  
604 Ferguson<sup>137</sup>, Amy Shepherd<sup>137</sup>.

605 **Chelsea & Westminster NHS Foundation Trust, London, UK** Luke Stephen Prockter  
606 Moore<sup>138</sup>, Marcela Paola Vizcaychipi<sup>138</sup>, Laura Gomes de Almeida Martins<sup>138</sup>, Jaime Carungcong<sup>138</sup>.

607 **The Queen Elizabeth Hospital, King's Lynn, UK** Inthakab Ali Mohamed Ali<sup>139</sup>, Karen  
608 Beaumont<sup>139</sup>, Mark Blunt<sup>\*,139</sup>, Zoe Coton<sup>‡,139</sup>, Hollie Curgenvin<sup>139</sup>, Mohamed Elsaadany<sup>139</sup>, Kay  
609 Fernandes<sup>139</sup>, Sameena Mohamed Ally<sup>139</sup>, Harini Rangarajan<sup>139</sup>, Varun Sarathy<sup>139</sup>, Sivarupan  
610 Selvanayagam<sup>139</sup>, Dave Vedage<sup>139</sup>, Matthew White<sup>139</sup>.

611 **King's Mill Hospital, Nottingham, UK** Mandy Gill<sup>‡,140</sup>, Paul Paul<sup>\*,140</sup>, Valli Ratnam<sup>\*,140</sup>,  
612 Sarah Shelton<sup>140</sup>, Inez Wynter<sup>140</sup>.

613 **Watford General Hospital, Watford, UK** Siobhain Carmody<sup>‡,141</sup>, Valerie Joan Page<sup>\*,141</sup>.

614 **University Hospital Wishaw, Wishaw, UK** Claire Marie Beith<sup>142</sup>, Karen Black<sup>142</sup>, Suzanne  
615 Clements<sup>142</sup>, Alan Morrison<sup>142</sup>, Dominic Strachan<sup>\*,142</sup>, Margaret Taylor<sup>‡,142</sup>, Michelle Clarkson<sup>142</sup>,  
616 Stuart D'Sylva<sup>142</sup>, Kathryn Norman<sup>142</sup>.

617 **Forth Valley Royal Hospital, Falkirk, UK** Fiona Auld<sup>143</sup>, Joanne Donnachie<sup>143</sup>, Ian  
618 Edmond<sup>\*,143</sup>, Lynn Prentice<sup>143</sup>, Nikole Runciman<sup>143</sup>, Dario Salutous<sup>‡,143</sup>, Lesley Symon<sup>143</sup>, Anne  
619 Todd<sup>143</sup>, Patricia Turner<sup>143</sup>, Abigail Short<sup>143</sup>, Laura Sweeney<sup>143</sup>, Euan Murdoch<sup>143</sup>, Dhaneesha  
620 Senaratne<sup>143</sup>.

621 **George Eliot Hospital NHS Trust, Nuneaton, UK** Michaela Hill<sup>144</sup>, Thogulava Kannan<sup>\*,144</sup>,  
622 Wild Laura<sup>144</sup>.

623 **Barnsley Hospital, Barnsley, UK** Rikki Crawley<sup>145</sup>, Abigail Crew<sup>145</sup>, Mishell Cunningham<sup>145</sup>,  
624 Allison Daniels<sup>145</sup>, Laura Harrison<sup>145</sup>, Susan Hope<sup>145</sup>, Ken Inweregbu<sup>\*,145</sup>, Sian Jones<sup>145</sup>, Nicola  
625 Lancaster<sup>145</sup>, Jamie Matthews<sup>145</sup>, Alice Nicholson<sup>‡,145</sup>, Gemma Wray<sup>145</sup>.

626 **The Great Western Hospital, Swindon, UK** Helen Langton<sup>146</sup>, Rachel Prout<sup>\*,146</sup>, Malcolm  
627 Watters<sup>\*,146</sup>, Catherine Novis<sup>146</sup>.

628 **Harefield Hospital, London, UK** Anthony Barron<sup>147</sup>, Ciara Collins<sup>147</sup>, Sundeep Kaul<sup>147</sup>,  
629 Heather Passmore<sup>147</sup>, Claire Prendergast<sup>147</sup>, Anna Reed<sup>\*,147</sup>, Paula Rogers<sup>147</sup>, Rajvinder Shokkar<sup>147</sup>,  
630 Meriel Woodruff<sup>147</sup>, Hayley Middleton<sup>147</sup>, Oliver Polgar<sup>147</sup>, Claire Nolan<sup>147</sup>, Vicky Thwaites<sup>‡,147</sup>,  
631 Kanta Mahay<sup>‡,147</sup>.

632 **Rotherham General Hospital, Rotherham, UK** Dawn Collier<sup>148</sup>, Anil Hormis<sup>\*,148</sup>, Rachel  
633 Walker<sup>‡,148</sup>, Victoria Maynard<sup>148</sup>.

634 **Ysbyty Gwynedd, Bangor, UK** Ellen Knights<sup>149</sup>, Alicia Price<sup>149</sup>, Alice Thomas<sup>‡,149</sup>, Chris  
635 Thorpe<sup>\*,149</sup>.

636 **Diana Princess of Wales Hospital, Grimsby, UK** Teresa Behan<sup>150</sup>, Caroline Burnett<sup>150</sup>,  
637 Jonathan Hatton<sup>150</sup>, Elaine Heeney<sup>150</sup>, Atideb Mitra<sup>\*,150</sup>, Maria Newton<sup>150</sup>, Rachel Pollard<sup>150</sup>,  
638 Rachael Stead<sup>‡,150</sup>.

639 **Russell's Hall Hospital, Dudley, UK** Vishal Amin<sup>\*,151</sup>, Elena Anastasescu<sup>‡,151</sup>, Vikram  
640 Anumakonda<sup>151</sup>, Komala Karthik<sup>151</sup>, Rizwana Kausar<sup>151</sup>, Karen Reid<sup>‡,151</sup>, Jacqueline Smith<sup>151</sup>,  
641 Janet Imeson-Wood<sup>151</sup>.

642 **Princess Royal Hospital** Denise Skinner<sup>152</sup>, Jane Gaylard<sup>152</sup>, Dee Mullan<sup>152</sup>, Julie Newman<sup>152</sup>.

643 **Princess Royal Hospital, Haywards Heath, UK** Denise Skinner<sup>152</sup>, Jane Gaylard<sup>152</sup>, Dee  
644 Mullan<sup>152</sup>, Julie Newman<sup>152</sup>.

645 **St Mary's Hospital, Newport, UK** Alison Brown<sup>153</sup>, Vikki Crickmore<sup>153</sup>, Gabor  
646 Debreceni<sup>\*,153</sup>, Joy Wilkins<sup>153</sup>, Liz Nicol<sup>153</sup>.

647 **University Hospital Lewisham, London, UK** Waqas Khaliq<sup>\*,154</sup>, Rosie Reece-Anthony<sup>‡,154</sup>,  
648 Mark Birt<sup>154</sup>.

649 **Colchester General Hospital, Colchester, UK** Alison Ghosh<sup>\*,155</sup>, Emma Williams<sup>155</sup>.

650 **Queen Elizabeth the Queen Mother Hospital, Margate, UK** Louise Allen<sup>156</sup>, Eva  
651 Beranova<sup>156</sup>, Nikki Crisp<sup>156</sup>, Joanne Deery<sup>156</sup>, Tracy Hazelton<sup>156</sup>, Alicia Knight<sup>156</sup>, Carly Price<sup>156</sup>,  
652 Sorrell Tilbey<sup>156</sup>, Salah Turki<sup>\*,156</sup>, Sharon Turney<sup>156</sup>.

653 **Royal Albert Edward Infirmary, Wigan, UK** Joshua Cooper<sup>157</sup>, Cheryl Finch<sup>‡,157</sup>, Sarah  
654 Lidert<sup>157</sup>, Alison Quinn<sup>\*,157</sup>, Natalia Waddington<sup>157</sup>.

655 **Victoria Hospital, Kirkcaldy, UK** Tina Coventry<sup>158</sup>, Susan Fowler<sup>‡,158</sup>, Michael  
656 MacMahon<sup>\*,158</sup>, Amanda McGregor<sup>158</sup>.

657 **Eastbourne District General Hospital, East Sussex, UK and Conquest Hospital, East  
658 Sussex, UK** Anne Cowley<sup>‡,159</sup>, Judith Highgate<sup>\*,159</sup>, Anne Cowley<sup>‡,159</sup>, Judith Highgate<sup>\*,159</sup>.

659 **Cumberland Infirmary, Carlisle, UK** Alison Brown<sup>160</sup>, Jane Gregory<sup>‡,160</sup>, Susan O'Connell<sup>160</sup>,  
660 Tim Smith<sup>\*,160</sup>, Luigi Barberis<sup>160</sup>.

661 **New Cross Hospital, Wolverhampton, UK** Shameer Gopal<sup>\*,161</sup>, Nichola Harris<sup>‡,161</sup>, Victoria  
662 Lake<sup>‡,161</sup>, Stella Metherell<sup>161</sup>, Elizabeth Radford<sup>161</sup>.

663 **The Princess Alexandra Hospital, Harlow, UK** Amelia Daniel<sup>162</sup>, Joanne Finn<sup>162</sup>, Rajnish  
664 Saha<sup>\*,162</sup>, Nikki White<sup>‡,162</sup>, Amy Easthope<sup>162</sup>.

665 **Salisbury District Hospital, Salisbury, UK** Phil Donnison<sup>\*,163</sup>, Fiona Trim<sup>163</sup>, Beena  
666 Eapen<sup>163</sup>.

667 **Dorset County Hospital, Dorchester, UK** Jenny Birch<sup>164</sup>, Laura Bough<sup>164</sup>, Josie Goodsell<sup>164</sup>,  
668 Rebecca Tutton<sup>164</sup>, Patricia Williams<sup>‡,164</sup>, Sarah Williams<sup>\*,164</sup>, Barbara Winter-Goodwin<sup>164</sup>.

669 **University College Dublin, St Vincent's University Hospital, Dublin, Ireland** Ailstair  
670 Nichol<sup>\*,165</sup>, Kathy Brickell<sup>‡,165</sup>, Michelle Smyth<sup>165</sup>, Lorna Murphy<sup>165</sup>.

671 **Glangwili General Hospital, Camarthen, UK** Samantha Coetzee<sup>‡,166</sup>, Alistair Gales<sup>\*,166</sup>,  
672 Igor Otahal<sup>\*,166</sup>, Meena Raj<sup>166</sup>, Craig Sell<sup>\*,166</sup>.

673 **Gloucestershire Royal Hospital, Gloucester, UK** Paula Hilltout<sup>\*,167</sup>, Jayne Evitts<sup>167</sup>,  
674 Amanda Tyler<sup>167</sup>, Joanne Waldron<sup>167</sup>.

675 **Yeovil Hospital, Yeovil, UK** Kate Beesley<sup>168</sup>, Sarah Board<sup>168</sup>, Agnieszka Kubisz-Pudelko<sup>\*,168</sup>,  
676 Alison Lewis<sup>168</sup>, Jess Perry<sup>168</sup>, Lucy Pippard<sup>168</sup>, Di Wood<sup>‡,168</sup>, Clare Buckley<sup>168</sup>.

677 **Leicester Royal Infirmary, Leicester, UK** Peter Barry<sup>\*,169</sup>, Neil Flint<sup>\*,169</sup>, Patel Rekha<sup>‡,169</sup>,  
678 Dawn Hales<sup>‡,169</sup>.

679 **Royal Manchester Children's Hospital, Manchester, UK** Lara Bunni<sup>170</sup>, Claire  
680 Jennings<sup>‡,170</sup>, Monica Latif<sup>170</sup>, Rebecca Marshall<sup>‡,170</sup>, Gayathri Subramanian<sup>\*,170</sup>.

681 **Royal Victoria Hospital, Belfast, NI** Peter J McGuigan<sup>\*,171</sup>, Christopher Wasson<sup>171</sup>,  
682 Stephanie Finn<sup>171</sup>, Jackie Green<sup>171</sup>, Erin Collins<sup>171</sup>, Bernadette King<sup>171</sup>.

683 **Wrexham Maelor Hospital, Wrexham, Wales** Andy Campbell<sup>\*,172</sup>, Sara Smuts<sup>172</sup>, Joseph  
684 Duffield<sup>172</sup>, Oliver Smith<sup>172</sup>, Lewis Mallon<sup>172</sup>, Watkins Claire<sup>172</sup>.

685 **Walsall Manor Hospital, Walsall, UK** Liam Botfield<sup>173</sup>, Joanna Butler<sup>‡,173</sup>, Catherine  
686 Dexter<sup>173</sup>, Jo Fletcher<sup>173</sup>, Atul Garg<sup>\*,173</sup>, Aditya Kuravi<sup>\*,173</sup>, Poonam Ranga<sup>‡,173</sup>, Emma  
687 Virgilio<sup>‡,173</sup>.

688 **Darent Valley Hospital, Dartford, UK** Zakaula Belagodu<sup>\*,174</sup>, Bridget Fuller<sup>174</sup>, Anca  
689 Gherman<sup>174</sup>, Olumide Olufuwa<sup>‡,174</sup>, Remi Paramsothy<sup>174</sup>, Carmel Stuart<sup>174</sup>, Naomi Oakley<sup>174</sup>,  
690 Charlotte Kamundi<sup>174</sup>, David Tyl<sup>174</sup>, Katy Collins<sup>174</sup>, Pedro Silva<sup>174</sup>, June Taylor<sup>174</sup>, Laura King<sup>174</sup>,  
691 Charlotte Coates<sup>174</sup>, Maria Crowley<sup>174</sup>, Phillipa Wakefield<sup>174</sup>, Jane Beadle<sup>174</sup>, Laura Johnson<sup>174</sup>,  
692 Janet Sargeant<sup>174</sup>, Madeleine Anderson<sup>174</sup>.

693 **Warrington General Hospital, Warrington, UK** Ailbhe Brady<sup>175</sup>, Rebekah Chan<sup>175</sup>, Jeff  
694 Little<sup>\*,175</sup>, Shane McIvor<sup>175</sup>, Helena Prady<sup>175</sup>, Helen Whittle<sup>175</sup>, Bijoy Mathew<sup>175</sup>.

695 **Warwick Hospital, Warwick, UK** Ben Attwood<sup>\*,176</sup>, Penny Parsons<sup>‡,176</sup>.

696 **University Hospitals Coventry & Warwickshire NHS Trust, Coventry, UK** Geraldine  
697 Ward<sup>177</sup>, Pamela Bremmer<sup>177</sup>.

698 **University Hospital Monklands, Airdrie, UK** West Joe<sup>178</sup>, Baird Tracy<sup>178</sup>, Ruddy Jim<sup>178</sup>.

699 **Princess of Wales Hospital, Llantrisant, UK** Ellie Davies<sup>179</sup>, Lisa Roche<sup>179</sup>, Sonia Sathe<sup>\*,179</sup>.

700 **Northwick Park Hospital, London, UK** Catherine Dennis<sup>180</sup>, Alastair McGregor<sup>\*,180</sup>, Victoria  
701 Parris<sup>\*,180</sup>, Sinduya Srikanan<sup>180</sup>, Anisha Sukha<sup>180</sup>.

702 **Raigmore Hospital, Inverness, UK** Rachael Campbell<sup>‡,181</sup>, Noreen Clarke<sup>181</sup>, Jonathan  
703 Whiteside<sup>\*,181</sup>, Mairi Mascarenhas<sup>181</sup>, Avril Donaldson<sup>181</sup>, Joanna Matheson<sup>181</sup>, Fiona Barrett<sup>181</sup>,  
704 Marianne O'Hara<sup>181</sup>, Laura Okeefe<sup>181</sup>, Clare Bradley<sup>181</sup>.

705 **Royal Free Hospital, London, UK** Christine Eastgate-Jackson<sup>182</sup>, Helder Filipe<sup>‡,182</sup>, Daniel  
706 Martin<sup>\*,182</sup>, Amitaa Maharajh<sup>182</sup>, Sara Mingo Garcia<sup>182</sup>, Mark De Neef<sup>‡182</sup>.

707 **Scunthorpe General Hospital, Scunthorpe, UK** Kathy Dent<sup>‡,183</sup>, Elizabeth Horsley<sup>183</sup>,  
708 Muhmmad Nauman Akhtar<sup>\*,183</sup>, Sandra Pearson<sup>183</sup>, Dorota Potoczna<sup>‡,183</sup>, Sue Spencer<sup>183</sup>.

709 **West Cumberland Hospital, Whitehaven, UK** Melanie Clapham<sup>‡,184</sup>, Rosemary Harper<sup>184</sup>,  
710 Una Poultney<sup>184</sup>, Polly Rice<sup>184</sup>, Tim Smith<sup>184</sup>, Rachel Mutch<sup>184</sup>, Luigi Barberis<sup>\*,184</sup>.

711 **Airedale General Hospital, Keighley, UK** Lisa Armstrong<sup>185</sup>, Hayley Bates<sup>‡,185</sup>, Emma  
712 Dooks<sup>‡,185</sup>, Fiona Farquhar<sup>‡,185</sup>, Brigid Hairsine<sup>\*,185</sup>, Chantal McParland<sup>185</sup>, Sophie Packham<sup>‡,185</sup>.

713 **Birmingham Children's Hospital, Birmingham, UK** Rehana Bi<sup>‡,186</sup>, Barney Scholefield<sup>\*,186</sup>,  
714 Lydia Ashton<sup>‡,186</sup>.

715 **Liverpool Heart and Chest Hospital, Liverpool, UK** Linsha George<sup>‡,187</sup>, Sophie Twiss<sup>187</sup>,  
716 David Wright<sup>\*,187</sup>.

717 **Pilgrim Hospital, Lincoln, UK** Manish Chablani<sup>\*,188</sup>, Amy Kirkby<sup>188</sup>, Kimberley  
718 Netherton<sup>188</sup>.

719 **Prince Philip Hospital, Lianelli, UK** Kim Davies<sup>189</sup>, Linda O'Brien<sup>‡,189</sup>, Zohra Omar<sup>189</sup>, Igor  
720 Otahal<sup>\*,189</sup>, Emma Perkins<sup>189</sup>, Tracy Lewis<sup>189</sup>, Isobel Sutherland<sup>189</sup>.

721 **Furness General Hospital, Barrow-in-Furness, UK** Karen Burns<sup>‡,190</sup>, Andrew Higham<sup>\*,190</sup>.



722 **Scarborough General Hospital, Scarborough, UK** Dr Ben Chandler<sup>191</sup>, Kerry Elliott<sup>\*,191</sup>,  
723 Janine Mallinson<sup>\*,191</sup>, Alison Turnbull<sup>191</sup>.

724 **Southend University Hospital, Westcliff-on-Sea, UK** Prisca Gondo<sup>\*,192</sup>, Bernard  
725 Hadebe<sup>192</sup>, Abdul Kayani<sup>192</sup>, Bridgett Masunda<sup>‡,192</sup>.

726 **Alder Hey Children's Hospital, Liverpool, UK** Taya Anderson<sup>193</sup>, Dan Hawcutt<sup>\*,193</sup>, Laura  
727 O'Malley<sup>‡,193</sup>, Laura Rad<sup>193</sup>, Naomi Rogers<sup>193</sup>, Paula Saunderson<sup>193</sup>, Kathryn Sian Allison<sup>193</sup>,  
728 Deborah Afolabi<sup>193</sup>, jennifer whitbread<sup>193</sup>, Dawn jones<sup>193</sup>, Rachael Dore<sup>193</sup>.

729 **Torbay Hospital, Torquay, UK** Matthew Halkes<sup>\*,194</sup>, Pauline Mercer<sup>‡,194</sup>, Lorraine  
730 Thornton<sup>194</sup>.

731 **Borders General Hospital, Melrose, UK** Joy Dawson<sup>‡,195</sup>, Sweyn Garrioch<sup>\*,195</sup>, Melanie  
732 Tolson<sup>195</sup>, Jonathan Aldridge<sup>195</sup>.

733 **Kent & Canterbury Hospital, Canterbury, UK** Ritoo Kapoor<sup>\*,196</sup>, David Loader<sup>196</sup>, Karen  
734 Castle<sup>196</sup>.

735 **West Suffolk Hospital, Bury St Edmunds, UK** Sally humphreys<sup>\*,197</sup>, Ruth Tampsett<sup>197</sup>.

736 **James Paget University Hospital NHS Trust, Great Yarmouth, UK** Katherine  
737 Mackintosh<sup>\*,198</sup>, Amanda Ayers<sup>198</sup>, Wendy Harrison<sup>‡,198</sup>, Julie North<sup>198</sup>.

738 **The Christie NHS Foundation Trust, Manchester, UK** Suzanne Allibone<sup>‡,199</sup>, Roman  
739 Genetu<sup>199</sup>, Vidya Kasipandian<sup>199</sup>, Amit Patel<sup>\*,199</sup>, Ainhi Mac<sup>199</sup>, Anthony Murphy<sup>199</sup>, Parisa  
740 Mahjoob<sup>199</sup>, Roonak Nazari<sup>199</sup>, Lucy Worsley<sup>199</sup>, Andrew Fagan<sup>199</sup>.

741 **The Royal Marsden Hospital, London, UK** Thomas Bemand<sup>200</sup>, Ethel Black<sup>‡,200</sup>, Arnold  
742 Dela Rosa<sup>200</sup>, Ryan Howle<sup>200</sup>, Shaman Jhanji<sup>\*,200</sup>, Ravishankar Rao Baikady<sup>200</sup>, Kate Colette  
743 Tatham<sup>\*,200</sup>, Benjamin Thomas<sup>200</sup>.

744 **University Hospital Hairmyres, East Kilbride, UK** Dina Bell<sup>201</sup>, Rosalind Boyle<sup>201</sup>, Katie  
745 Douglas<sup>201</sup>, Lynn Glass<sup>201</sup>, Emma Lee<sup>201</sup>, Liz Lennon<sup>201</sup>, Austin Rattray<sup>\*,201</sup>.

746 **Withybush General Hospital, Pembrokeshire, Wales** Abigail Taylor<sup>202</sup>, Rachel Anne  
747 Hughes<sup>202</sup>, Helen Thomas<sup>202</sup>, Alun Rees<sup>202</sup>, Michaela Duskova<sup>202</sup>, Janet Phipps<sup>202</sup>, Suzanne  
748 Brooks<sup>202</sup>, Michelle Edwards<sup>202</sup>.

749 **Ealing Hospital, Southall, UK** Victoria Parris<sup>\*,203</sup>, Sheena Quaid<sup>‡,203</sup>, Ekaterina Watson<sup>203</sup>.

750 **North Devon District Hospital, Barnstaple, UK** Adam Brayne<sup>204</sup>, Emma Fisher<sup>204</sup>, Jane  
751 Hunt<sup>‡,204</sup>, Peter Jackson<sup>204</sup>, Duncan Kaye<sup>204</sup>, Nicholas Love<sup>\*,204</sup>, Juliet Parkin<sup>204</sup>, Victoria  
752 Tuckey<sup>204</sup>, Lynne Van Koutrik<sup>204</sup>, Sasha Carter<sup>204</sup>, Benedict Andrew<sup>204</sup>, Louise Findlay<sup>204</sup>, Katie  
753 Adams<sup>204</sup>.

754 **St John's Hospital Livingston, Livingston, UK** Alison Williams<sup>205</sup>, Claire Cheyne<sup>205</sup>, Anne  
755 Saunderson<sup>205</sup>, Sam Moultrie<sup>\*,205</sup>, Miranda Odam<sup>205</sup>.

756 **Northampton General Hospital NHS Trust, Northampton, UK** Kathryn Hall<sup>206</sup>, Ishe-  
757 unesu Mapfunde<sup>206</sup>.

758 **Harrogate and District NHS Foundation Trust, Harrogate, UK** Chunda Sri-Chandana<sup>207</sup>,  
759 Joslan Scherewode<sup>207</sup>, Lorraine Stephenson<sup>207</sup>, Sarah Marsh<sup>207</sup>.

760 **National Hospital for Neurology and Neurosurgery, London, UK** David Brealey<sup>\*,208</sup>,  
761 John Hardy<sup>208</sup>, Henry Houlden<sup>208</sup>, Eleanor Moncur<sup>208</sup>, Eamon Raith<sup>\*,208</sup>, Ambreen Tariq<sup>‡,208</sup>,  
762 Arianna Tucci<sup>208</sup>.

763 **Bronglais General Hospital, Aberystwyth, UK** Maria Hobrok<sup>\*,209</sup>, Ronda Loosley<sup>209</sup>,  
764 Heather McGuinness<sup>209</sup>, Helen Tench<sup>‡,209</sup>, Rebecca Wolf-Roberts<sup>209</sup>.

765 **Golden Jubilee National Hospital, Clydebank, UK** Val Irvine<sup>‡,210</sup>, Benjamin Shelley<sup>\*,210</sup>.

766 **Homerton University Hospital Foundation NHS Trust, London UK** Amy Easthope<sup>211</sup>,  
767 Claire Gorman<sup>211</sup>, Abhinav Gupta<sup>\*,211</sup>, Elizabeth Timlick<sup>‡,211</sup>, Rebecca Brady<sup>211</sup>.

768 **Royal Hospital for Children, Glasgow, UK** Colin Begg<sup>\*,3</sup>, Barry Milligan<sup>3</sup>.

769 **Sheffield Children's Hospital, Sheffield, UK** Arianna Bellini<sup>‡,212</sup>, Jade Bryant<sup>212</sup>, Anton  
770 Mayer<sup>\*,212</sup>, Amy Pickard<sup>212</sup>, Nicholas Roe<sup>212</sup>, Jason Sowter<sup>212</sup>, Alex Howlett<sup>212</sup>.

771 ‡ - Team Lead

772 \* - PI

773 <sup>1</sup>Roslin Institute, University of Edinburgh, Easter Bush, Edinburgh, EH25 9RG, UK

774 <sup>2</sup>Intensive Care Unit, Royal Infirmary of Edinburgh, 54 Little France Drive, Edinburgh, EH16 5SA,  
775 UK

776 <sup>3</sup>Royal Hospital for Children, Glasgow, UK

777 <sup>4</sup>William Harvey Research Institute, Barts and the London School of Medicine and Dentistry, Queen  
778 Mary University of London, London EC1M 6BQ, UK

779 <sup>5</sup>Centre for Tropical Medicine and Global Health, Nuffield Department of Medicine, University of  
780 Oxford, Old Road Campus, Roosevelt Drive, Oxford, OX3 7FZ, UK

781 <sup>6</sup>Wellcome Centre for Human Genetics, University of Oxford, Oxford, UK

782 <sup>7</sup>Department of Critical Care Medicine, Queen's University and Kingston Health Sciences Centre,  
783 Kingston, ON, Canada

784 <sup>8</sup>Wellcome-Wolfson Institute for Experimental Medicine, Queen's University Belfast, Belfast, North-  
785 ern Ireland, UK

786 <sup>9</sup>Department of Intensive Care Medicine, Royal Victoria Hospital, Belfast, Northern Ireland, UK

787 <sup>10</sup>UCL Centre for Human Health and Performance, London, W1T 7HA, UK

788 <sup>11</sup>Clinical Research Centre at St Vincent's University Hospital, University College Dublin, Dublin,

789 Ireland  
790 <sup>12</sup>National Heart and Lung Institute, Imperial College London, London, UK  
791 <sup>13</sup>Imperial College Healthcare NHS Trust:London,London,UK  
792 <sup>14</sup>MRC Human Genetics Unit, Institute of Genetics and Molecular Medicine, University of Edin-  
793 burgh, Western General Hospital, Crewe Road, Edinburgh, EH4 2XU, UK  
794 <sup>15</sup>Intensive Care National Audit & Research Centre, London, UK  
795 <sup>16</sup>NIHR Health Protection Research Unit for Emerging and Zoonotic Infections, Institute of Infection,  
796 Veterinary and Ecological Sciences University of Liverpool, Liverpool, L69 7BE, UK  
797 <sup>17</sup>Respiratory Medicine, Alder Hey Children’s Hospital, Institute in The Park, University of Liver-  
798 pool, Alder Hey Children’s Hospital, Liverpool, UK  
799 <sup>18</sup>Department of Intensive Care Medicine, Guy’s and St. Thomas NHS Foundation Trust, London,  
800 UK  
801 <sup>19</sup>Department of Medicine, University of Cambridge, Cambridge, UK  
802 <sup>20</sup>Cambridge University Hospitals NHS Foundation Trust, Hills Road, Cambridge, CB2 0QQ, UK  
803 <sup>21</sup>Edinburgh Clinical Research Facility, Western General Hospital, University of Edinburgh, EH4  
804 2XU, UK  
805 <sup>22</sup>Department of Infectious Diseases, Leiden University Medical Center, Leiden, The Netherlands  
806 <sup>23</sup>Guys and St Thomas’ Hospital, London, UK  
807 <sup>24</sup>Barts Health NHS Trust, London, UK  
808 <sup>25</sup>James Cook University Hospital, Middlesbrough, UK  
809 <sup>26</sup>Royal Stoke University Hospital, Staffordshire, UK  
810 <sup>27</sup>North Middlesex University Hospital NHS trust, London, UK  
811 <sup>28</sup>north Middlesex University Hospital NHS trust, London, UK  
812 <sup>29</sup>The Royal Liverpool University Hospital, Liverpool, UK  
813 <sup>30</sup>King’s College Hospital, London, UK  
814 <sup>31</sup>Charing Cross Hospital, St Mary’s Hospital and Hammersmith Hospital, London, UK  
815 <sup>32</sup>Nottingham University Hospital, Nottingham, UK  
816 <sup>33</sup>John Radcliffe Hospital, Oxford, UK  
817 <sup>34</sup>Kingston Hospital, Surrey, UK  
818 <sup>35</sup>Royal Infirmary of Edinburgh, Edinburgh, UK  
819 <sup>36</sup>Queen Alexandra Hospital, Portsmouth, UK  
820 <sup>37</sup>Morrison Hospital, Swansea, UK  
821 <sup>38</sup>Addenbrooke’s Hospital, Cambridge, UK  
822 <sup>39</sup>BHRUT (Barking Havering) - Queens Hospital and King George Hospital, Essex, UK  
823 <sup>40</sup>Royal Sussex County Hospital, Brighton, UK  
824 <sup>41</sup>Queen Elizabeth Hospital, Birmingham, UK  
825 <sup>42</sup>St George’s Hospital, London, UK  
826 <sup>43</sup>Stepping Hill Hospital, Stockport, UK  
827 <sup>44</sup>Countess of Chester Hospital, Chester, UK  
828 <sup>45</sup>Royal Blackburn Teaching Hospital, Blackburn, UK  
829 <sup>46</sup>The Tunbridge Wells Hospital and Maidstone Hospital, Kent, UK  
830 <sup>47</sup>Royal Gwent Hospital, Newport, UK  
831 <sup>48</sup>Pinderfields General Hospital, Wakefield, UK  
832 <sup>49</sup>Royal Berkshire NHS Foundation Trust, Berkshire, UK  
833 <sup>50</sup>Broomfield Hospital, Chelmsford, UK  
834 <sup>51</sup>Northumbria Healthcare NHS Foundation Trust, North Shields, UK

835 <sup>52</sup>Whiston Hospital, Prescot, UK  
836 <sup>53</sup>Croydon University Hospital, Croydon, UK  
837 <sup>54</sup>York Hospital, York, UK  
838 <sup>55</sup>Heartlands Hospital, Birmingham, UK  
839 <sup>56</sup>Ashford and St Peter's Hospital, Surrey, UK  
840 <sup>57</sup>Barnet Hospital, London, UK  
841 <sup>58</sup>East Surrey Hospital, Redhill, UK  
842 <sup>59</sup>Ninewells Hospital, Dundee, UK  
843 <sup>60</sup>Worthing Hospital, Worthing, UK and St Richard's Hospital, Chichester, UK  
844 <sup>61</sup>Southampton General Hospital, Southampton, UK  
845 <sup>62</sup>The Alexandra Hospital, Redditch and Worcester Royal Hospital, Worcester, UK  
846 <sup>63</sup>Sandwell General Hospital and City Hospital, Birmingham, UK  
847 <sup>64</sup>Blackpool Victoria Hospital, Blackpool, UK  
848 <sup>65</sup>Royal Glamorgan Hospital, Pontyclun, UK  
849 <sup>66</sup>The Royal Oldham Hospital, Manchester, UK  
850 <sup>67</sup>Glasgow Royal Infirmary, Glasgow, UK  
851 <sup>68</sup>St James's University Hospital and Leeds General Infirmary, Leeds, UK  
852 <sup>69</sup>University Hospital North Durham, Darlington, UK and Darlington Memorial Hospital, Darlington,  
853 UK  
854 <sup>70</sup>Fairfield General Hospital, Bury, UK  
855 <sup>71</sup>Wythenshawe Hospital, Manchester, UK  
856 <sup>72</sup>Royal Alexandra Hospital, Paisley, UK  
857 <sup>73</sup>Good Hope Hospital, Birmingham, UK  
858 <sup>74</sup>Tameside General Hospital, Ashton Under Lyne, UK  
859 <sup>75</sup>Royal Derby Hospital, Derby, UK  
860 <sup>76</sup>Medway Maritime Hospital, Gillingham, UK  
861 <sup>77</sup>Royal Victoria Infirmary, Newcastle Upon Tyne, UK  
862 <sup>78</sup>Poole Hospital, Poole, UK  
863 <sup>79</sup>Bedford Hospital, Bedford, UK  
864 <sup>80</sup>Queens Hospital Burton, Burton-On-Trent, UK  
865 <sup>81</sup>North Manchester General Hospital, Manchester, UK  
866 <sup>82</sup>Aberdeen Royal Infirmary, Aberdeen, UK  
867 <sup>83</sup>Derriford Hospital, Plymouth, UK  
868 <sup>84</sup>Manchester Royal Infirmary, Manchester, UK  
869 <sup>85</sup>Salford Royal Hospital, Manchester, UK  
870 <sup>86</sup>William Harvey Hospital, Ashford, UK  
871 <sup>87</sup>Queen Elizabeth University Hospital, Glasgow, UK  
872 <sup>88</sup>Bradford Royal Infirmary, Bradford, UK  
873 <sup>89</sup>Bristol Royal Infirmary, Bristol, UK  
874 <sup>90</sup>Norfolk and Norwich University hospital (NNUH), Norwich, UK  
875 <sup>91</sup>Queen Elizabeth Hospital Gateshead, Gateshead, UK  
876 <sup>92</sup>Sunderland Royal Hospital, Sunderland, UK  
877 <sup>93</sup>Aintree University Hospital, Liverpool, UK  
878 <sup>94</sup>Hull Royal Infirmary, Hull, UK  
879 <sup>95</sup>Hull Royal Infirmary, Hull, UK  
880 <sup>96</sup>University College Hospital, London, UK

881 <sup>97</sup>Royal Devon and Exeter Hospital, Exeter, UK  
882 <sup>98</sup>The Royal Papworth Hospital, Cambridge, UK  
883 <sup>99</sup>Ipswich Hospital, Ipswich, UK  
884 <sup>100</sup>Southmead Hospital, Bristol, UK  
885 <sup>101</sup>Milton Keynes University Hospital, Milton Keynes, UK  
886 <sup>102</sup>Royal Hampshire County Hospital, Hampshire, UK  
887 <sup>103</sup>Queen Elizabeth Hospital, Woolwich, London, UK  
888 <sup>104</sup>Great Ormond St Hospital and UCL Great Ormond St Institute of Child Health NIHR Biomedical  
889 Research Centre, London, UK  
890 <sup>105</sup>Stoke Mandeville Hospital, Buckinghamshire, UK  
891 <sup>106</sup>University Hospital of Wales, Cardiff, UK  
892 <sup>107</sup>Basingstoke and North Hampshire Hospital, Basingstoke, UK  
893 <sup>108</sup>Arrove Park Hospital, Wirral, UK  
894 <sup>109</sup>Chesterfield Royal Hospital Foundation Trust, Chesterfield, UK  
895 <sup>110</sup>Musgrove Park Hospital, Taunton, UK  
896 <sup>111</sup>Peterborough City Hospital, Peterborough, UK and Hinchingsbrooke Hospital, Huntingdon, UK  
897 <sup>112</sup>Royal Hallamshire Hospital and Northern General Hospital, Sheffield, UK  
898 <sup>113</sup>Dumfries and Galloway Royal Infirmary, Dumfries, UK  
899 <sup>114</sup>Royal Bolton Hospital, Bolton, UK  
900 <sup>115</sup>Lister Hospital, Stevenage, UK  
901 <sup>116</sup>Craigavon Area Hospital, County Armagh, NI  
902 <sup>117</sup>Southport and Formby District General Hospital, Ormskirk, UK  
903 <sup>118</sup>Calderdale Royal Hospital, Halifax, UK and Huddersfield Royal Infirmary, Huddersfield, UK  
904 <sup>119</sup>Prince Charles Hospital, Merthyr Tydfil, UK  
905 <sup>120</sup>Royal Bournemouth Hospital, Bournemouth, UK  
906 <sup>121</sup>Royal Preston Hospital, Preston, UK  
907 <sup>122</sup>Whittington Hospital, London, UK  
908 <sup>123</sup>Princess Royal Hospital, Telford and Royal Shrewsbury Hospital, Shrewsbury, UK  
909 <sup>124</sup>Macclesfield District General Hospital, Macclesfield, UK  
910 <sup>125</sup>Royal Surrey County Hospital, Guildford, UK  
911 <sup>126</sup>Hereford County Hospital, Hereford, UK  
912 <sup>127</sup>University Hospital of North Tees, Stockton on Tees, UK  
913 <sup>128</sup>Lincoln County Hospital, Lincoln, UK  
914 <sup>129</sup>Royal Cornwall Hospital, Truro, UK  
915 <sup>130</sup>Royal United Hospital, Bath, UK  
916 <sup>131</sup>Royal Brompton Hospital, London, UK  
917 <sup>132</sup>University Hospital Crosshouse, Kilmarnock, UK  
918 <sup>133</sup>Basildon Hospital, Basildon, UK  
919 <sup>134</sup>Glan Clwyd Hospital, Bodelwyddan, UK  
920 <sup>135</sup>West Middlesex Hospital, Isleworth, UK  
921 <sup>136</sup>Royal Lancaster Infirmary, Lancaster, UK  
922 <sup>137</sup>Western General Hospital, Edinburgh, UK  
923 <sup>138</sup>Chelsea & Westminster NHS Foundation Trust, London, UK  
924 <sup>139</sup>The Queen Elizabeth Hospital, King's Lynn, UK  
925 <sup>140</sup>King's Mill Hospital, Nottingham, UK  
926 <sup>141</sup>Watford General Hospital, Watford, UK

927 142 University Hospital Wishaw, Wishaw, UK  
928 143 Forth Valley Royal Hospital, Falkirk, UK  
929 144 George Eliot Hospital NHS Trust, Nuneaton, UK  
930 145 Barnsley Hospital, Barnsley, UK  
931 146 The Great Western Hospital, Swindon, UK  
932 147 Harefield Hospital, London, UK  
933 148 Rotherham General Hospital, Rotherham, UK  
934 149 Ysbyty Gwynedd, Bangor, UK  
935 150 Diana Princess of Wales Hospital, Grimsby, UK  
936 151 Russell's Hall Hospital, Dudley, UK  
937 152 Princess Royal Hospital, Haywards Heath, UK  
938 153 St Mary's Hospital, Newport, UK  
939 154 University Hospital Lewisham, London, UK  
940 155 Colchester General Hospital, Colchester, UK  
941 156 Queen Elizabeth the Queen Mother Hospital, Margate, UK  
942 157 Royal Albert Edward Infirmary, Wigan, UK  
943 158 Victoria Hospital, Kirkcaldy, UK  
944 159 Eastbourne District General Hospital, East Sussex, UK and Conquest Hospital, East Sussex, UK  
945 160 Cumberland Infirmary, Carlisle, UK  
946 161 New Cross Hospital, Wolverhampton, UK  
947 162 The Princess Alexandra Hospital, Harlow, UK  
948 163 Salisbury District Hospital, Salisbury, UK  
949 164 Dorset County Hospital, Dorchester, UK  
950 165 University College Dublin, St Vincent's University Hospital, Dublin, Ireland  
951 166 Glangwili General Hospital, Camarthen, UK  
952 167 Gloucestershire Royal Hospital, Gloucester, UK  
953 168 Yeovil Hospital, Yeovil, UK  
954 169 Leicester Royal Infirmary, Leicester, UK  
955 170 Royal Manchester Children's Hospital, Manchester, UK  
956 171 Royal Victoria Hospital, Belfast, NI  
957 172 Wrexham Maelor Hospital, Wrexham, Wales  
958 173 Walsall Manor Hospital, Walsall, UK  
959 174 Darent Valley Hospital, Dartford, UK  
960 175 Warrington General Hospital, Warrington, UK  
961 176 Warwick Hospital, Warwick, UK  
962 177 University Hospitals Coventry & Warwickshire NHS Trust, Coventry, UK  
963 178 University Hospital Monklands, Airdrie, UK  
964 179 Princess of Wales Hospital, Llantrisant, UK  
965 180 Northwick Park Hospital, London, UK  
966 181 Raigmore Hospital, Inverness, UK  
967 182 Royal Free Hospital, London, UK  
968 183 Scunthorpe General Hospital, Scunthorpe, UK  
969 184 West Cumberland Hospital, Whitehaven, UK  
970 185 Airedale General Hospital, Keighley, UK  
971 186 Birmingham Children's Hospital, Birmingham, UK  
972 187 Liverpool Heart and Chest Hospital, Liverpool, UK

973 188 Pilgrim Hospital, Lincoln, UK  
974 189 Prince Philip Hospital, Lianelli, UK  
975 190 Furness General Hospital, Barrow-in-Furness, UK  
976 191 Scarborough General Hospital, Scarborough, UK  
977 192 Southend University Hospital, Westcliff-on-Sea, UK  
978 193 Alder Hey Children's Hospital, Liverpool, UK  
979 194 Torbay Hospital, Torquay, UK  
980 195 Borders General Hospital, Melrose, UK  
981 196 Kent & Canterbury Hospital, Canterbury, UK  
982 197 West Suffolk Hospital, Bury St Edmunds, UK  
983 198 James Paget University Hospital NHS Trust, Great Yarmouth, UK  
984 199 The Christie NHS Foundation Trust, Manchester, UK  
985 200 The Royal Marsden Hospital, London, UK  
986 201 University Hospital Hairmyres, East Kilbride, UK  
987 202 Withybush General Hospital, Pembrokeshire, Wales  
988 203 Ealing Hospital, Southall, UK  
989 204 North Devon District Hospital, Barnstaple, UK  
990 205 St John's Hospital Livingston, Livingston, UK  
991 206 Northampton General Hospital NHS Trust, Northampton, UK  
992 207 Harrogate and District NHS Foundation Trust, Harrogate, UK  
993 208 National Hospital for Neurology and Neurosurgery, London, UK  
994 209 Bronglais General Hospital, Aberystwyth, UK  
995 210 Golden Jubilee National Hospital, Clydebank, UK  
996 211 Homerton University Hospital Foundation NHS Trust, London UK  
997 212 Sheffield Children's Hospital, Sheffield, UK

## 998 Covid-19 Human Genetics Initiative

999 A full list of contributors to this project is available at [www.covid19hg.org/acknowledgements](http://www.covid19hg.org/acknowledgements).

## 1000 23andMe Investigators

1001 Janie F. Shelton\*<sup>1</sup>, Anjali J. Shastri\*<sup>1</sup>, Chelsea Ye<sup>1</sup>, Catherine H. Weldon<sup>1</sup>, Teresa Filshtein-Sonmez<sup>1</sup>,  
1002 Daniella Coker<sup>1</sup>, Antony Symons<sup>1</sup>, Jorge Esparza-Gordillo<sup>2</sup>, The 23andMe COVID-19 Team<sup>1</sup>, Stella  
1003 Aslibekyan<sup>1</sup>, Adam Auton<sup>1</sup>.

1004 \*These authors contributed equally to this work. 1. 23andMe Inc., 223 N Mathilda Ave, Sunnyvale,  
1005 CA 94086 2. Human genetics - R&D, GSK Medicines Research Centre, Target Sciences-R&D,  
1006 Stevenage, UK

1007 We thank the 23andMe research participants who made this study possible. We would also like  
1008 to thank Altovise Ewing, Aaron Petrakovitz, Anne Park, Anne Silk, Aushawna Collins, Becky  
1009 Macintosh, Carolyn Kao, Courtney Ball, Christine Pai, David Hinds, Devyn Parry, Elo Ratchiff,  
1010 Emily Bullis, Eric Hall, Farwa Alam, Jacquie Haggarty, Jess Christenson, Jim Lawrence, Jimmy  
1011 Chau, Josie Shaw, Joe Cackler, Karl Heilbron, Katelyn Kukar, Katie Watson, Marianna Frendo,  
1012 Olivia Valenti, Ryan Workman, Rachel Lopatin, Robert Bell, Rose Eckert, Sam Rodgers, Sarah Rys,

1013 Shawna Averbeck, Shirin Fuller, Vanessa Lane, and Yunxuan Jiang for contributions and insights.

1014 We also thank the 23andMe Research Team: Barry Hicks, Chao Tian, Devika Dhamija, Elizabeth  
1015 Babalola, Elizabeth S. Noblin, Ethan M. Jewett, G. David Poznik, Gabriel Cuellar Partida, Jared  
1016 O’Connell, Jingchunzi Shi, Joanna L. Mountain, Joyce Y. Tung, Katarzyna Bryc, Karen E. Huber,  
1017 Keng-Han Lin, Kimberly F. McManus, Kipper Fletez-Brant, Marie K. Luff, Matthew H. McIntyre,  
1018 Maya Lowe, Meghan E. Moreno, Peter Wilton, Pierre Fontanillas, Priyanka Nandakumar, Sahar V.  
1019 Mozaffari, Sarah L. Elson, Sayantan Das, Steven J. Micheletti, Suyash Shringarpure, Vinh Tran,  
1020 Wei Wang, Will Freyman, and Xin Wang.

1021 Members of the 23andMe COVID-19 Team are: Adam Auton, Adrian Chubb, Alison Fitch, Alison  
1022 Kung, Amanda Altman, Andy Kill, Anjali Shastri, Catherine Weldon, Chelsea Ye, Daniella Coker,  
1023 Janie Shelton, Jason Tan, Jeff Pollard, Jennifer McCreight, Jess Bielenberg, John Matthews, Johnny  
1024 Lee, Lindsey Tran, Michelle Agee, Monica Royce, Nate Tang, Pooja Gandhi, Raffaello d’Amore,  
1025 Ruth Tennen, Scott Dvorak, Scott Hadly, Stella Aslibekyan, Sungmin Park, Taylor Morrow, Teresa  
1026 Filshtein Sonmez, Trung Le, and Yiwen Zheng.
